# Supplementary material for: DNDMH-mediated direct nitration of aryl alkenes
Source: Royal Society of Chemistry journal article supplement (doi:10.1039/d3cc06275a), 2024-01-01
Supplement: d3cc06275a1.pdf [file d3cc06275a1.pdf]

## **DNDMH-Mediated Direct Nitration of Aryl Alkenes**

Lihua Niu<sup>†</sup>, Hao Guo<sup>†</sup>, Fuqiang Jia, Jiayu Shen, Yunxia Wang\* and  
Xiangdong Hu\*

*College of Chemistry & Materials Science, Key Laboratory of Synthetic and  
Natural Functional Molecule Chemistry of Ministry of Education of China,  
Northwest University, Xi'an 710127, China*

[<sup>†</sup>] These authors contributed equally to this work.

Corresponding authors: [wyx27210@nwu.edu.cn](mailto:wyx27210@nwu.edu.cn) and [xiangdonghu@nwu.edu.cn](mailto:xiangdonghu@nwu.edu.cn)

## TABLE OF CONTENTS

|                                                                                            |     |
|--------------------------------------------------------------------------------------------|-----|
| 1. General information .....                                                               | S3  |
| 2. Explorations on optimization of the direct nitration of <b>6a</b> with DNDMH .....      | S4  |
| 3. General procedure for preparation alkenes from corresponding aldehydes or ketones ..... | S7  |
| 4. General procedure for the direct nitration of aryl alkenes <b>6</b> with DNDMH .....    | S10 |
| 5. Copies of NMR spectre .....                                                             | S25 |
| References .....                                                                           | S65 |

## 1. General information

**For Solvent and Reagent:** Anhydrous tetrahydrofuran (THF) was dried and distilled from sodium and benzophenone. Other solvents and reagents were purchased commercially and used without further purification.

**For Reaction Operation:** Reactions were generally performed in round-bottom flask unless other specific illuminations, and monitored by thin-layer chromatography (TLC, 254 nm silica gel 60-F plates) with fluorescence upon 254 nm irradiation, potassium permanganate (KMnO<sub>4</sub>) stain, and phosphomolybdic acid (PMA) stain. Flash chromatographies were applied for the purification of reaction products with silica gel 200-300 mesh.

**For NMR Spectroscopy:** All NMR spectra were obtained at ambient temperature using Bruker AVANCE III-400MHz, JEOL-ZETA 400MHz or JEOL-ZETA 600MHz spectrometers. <sup>1</sup>H NMR and <sup>13</sup>C NMR spectra were recorded with CDCl<sub>3</sub> unless other specific illuminations. Spectra were referenced internally to the residual proton resonance of CDCl<sub>3</sub> ( $\delta$  7.26 ppm <sup>1</sup>H NMR,  $\delta$  77.16 ppm <sup>13</sup>C NMR) with tetramethylsilane (TMS,  $\delta$  0.00 ppm) as the standard. Chemical shifts ( $\delta$ ) were reported as part per million (ppm) in  $\delta$  scale downfield from TMS. <sup>1</sup>H NMR data were recorded as follows: multiplicity (s = singlet, d = doublet, t = triplet, m = multiplet, septet or unresolved), coupling constant (Hz), integration. <sup>13</sup>C NMR spectra were recorded with complete <sup>1</sup>H decoupling.

**For Mass Spectrometry:** High resolution mass spectrometry (HRMS) data were obtained on a MicrOTOF-Q II (hybrid quadrupolar/time-of-flight) API US system by electrospray ionization (ESI) in the positive or negative ion mode from Bruker Corporation.

**For IR Spectroscopy:** Infrared spectra were recorded on an INVENIO spectrometer from Bruker Corporation as thin films. Absorptions are given in wavenumbers (cm<sup>-1</sup>).

## 2. Explorations on optimization of the direct nitration of **6a** with DNDMH

### 2.1 Examinations of other Lewis Acids in direct nitration of **6a** with DNDMH

**Table S1:** Examinations different Lewis/Acid in direct nitration of **6a** with DNDMH

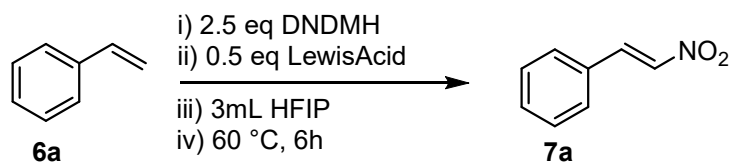

| Entry | LewisAcid                          | Yield/%     |
|-------|------------------------------------|-------------|
| 1     | Mg(ClO <sub>4</sub> ) <sub>2</sub> | trace       |
| 2     | Cu(OTf) <sub>2</sub>               | 3%          |
| 3     | Sn(OTf) <sub>2</sub>               | No reaction |
| 4     | Ni(OTf) <sub>2</sub>               | trace       |
| 5     | Zn(OTf) <sub>2</sub>               | trace       |
| 6     | Yb(OTf) <sub>2</sub>               | No reaction |
| 7     | AgOTf                              | No reaction |
| 8     | Sc(OTf) <sub>3</sub>               | No reaction |

### 2.2 Examinations of DNDMH mediated direct nitration of **6a** with TEMPO in various solvent

**Table S2:** Examinations of DNDMH mediated direct nitration of **6a** with TEMPO in various solvent

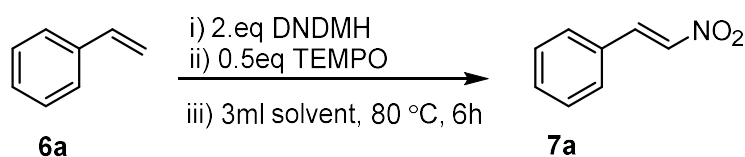

| Entry | solvent           | Yield/%     |
|-------|-------------------|-------------|
| 1     | DCE               | 40          |
| 2     | HFIP              | No reaction |
| 3     | Acetone           | No reaction |
| 4     | THF               | trace       |
| 5     | MTBE              | 38          |
| 6     | CCl <sub>4</sub>  | 31          |
| 7     | 1,4-Dioxane       | No reaction |
| 8     | EtOAc             | trace       |
| 9     | MeNO <sub>2</sub> | No reaction |
| 10    | MeCN              | trace       |

|    |     |             |
|----|-----|-------------|
| 11 | DMF | No reaction |
| 12 | TFE | No reaction |

### 2.3 Optimization of the amount of Cu(OAc)<sub>2</sub> in direct nitration of **6a** with DNDMH

**Table S3:** Optimization of the amount of Cu(OAc)<sub>2</sub> in direct nitration of **6a** with DNDMH

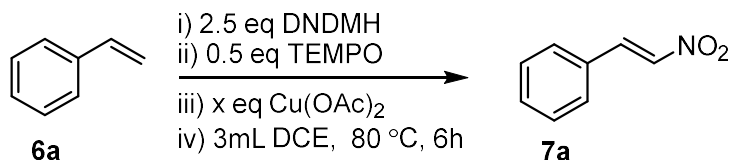

| Entry | Cu(OAc) <sub>2</sub> | Yield/% |
|-------|----------------------|---------|
| 1     | 0.7 eq               | 73      |
| 2     | 1 eq                 | 84      |
| 3     | 1.3 eq               | 81      |
| 4     | 1.7 eq               | 94      |
| 5     | 2 eq                 | 84      |

### 2.4 Optimization of the amount of TEMPO in direct nitration of **6a** with DNDMH

**Table S4:** Optimization of the amount of TEMPO in direct nitration of **6a** with DNDMH

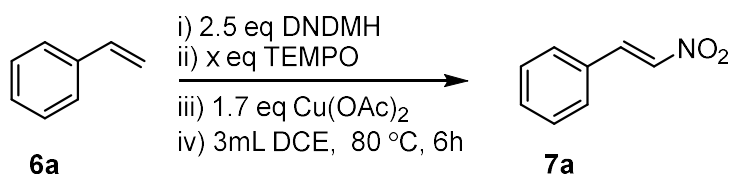

| Entry | TEMPO  | Yield/% |
|-------|--------|---------|
| 1     | 0.1 eq | 46      |
| 2     | 0.2 eq | 96      |
| 3     | 0.3 eq | 87      |
| 4     | 0.5 eq | 94      |
| 5     | 0.7 eq | 81      |
| 6     | 1 eq   | 78      |

### 2.5 Optimization of the amount of DNDMH in direct nitration of **6a** with DNDMH

**Table S5:** Optimization of the amount of DNDMH in direct nitration of **6a** with DNDMH

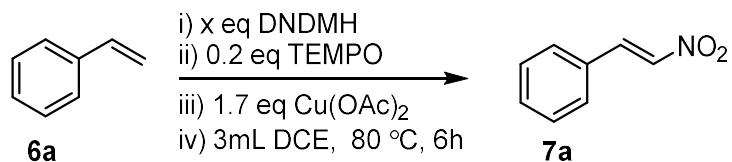

| Entry | DNDMH  | Yield/% |
|-------|--------|---------|
| 1     | 1.1 eq | 73      |
| 2     | 1.5 eq | 77      |
| 3     | 2 eq   | 93      |
| 4     | 2.5 eq | 96      |
| 5     | 3.5 eq | 90      |
| 6     | 4.5 eq | 91      |

## 2.6 Examinations of direct nitration of alkenes with alkyl substituents

**Table S6:** Examinations of direct nitration of alkenes with alkyl substituents (no expected product observed in every case )

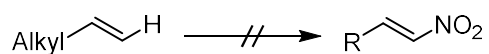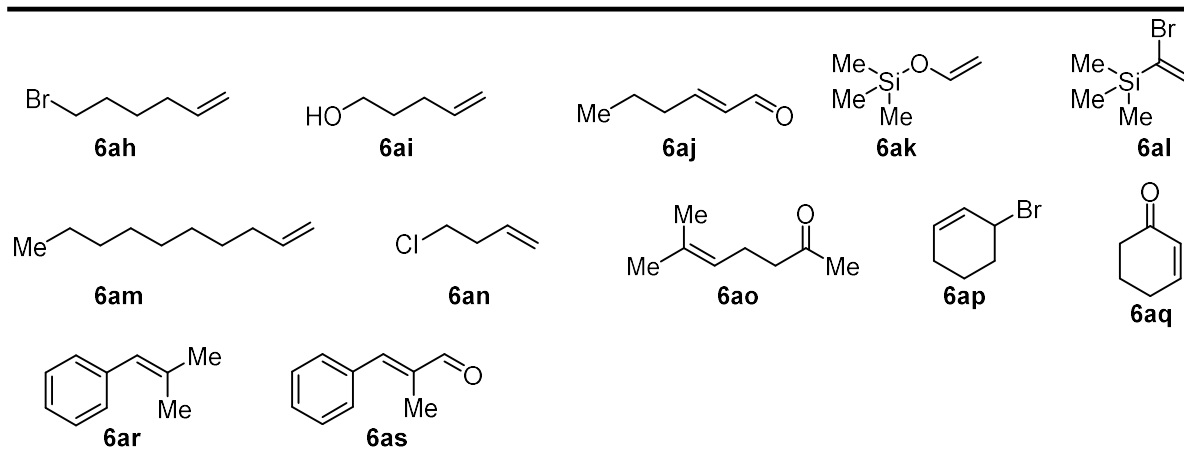

### 3. General procedure for preparation alkenes from corresponding aldehydes or ketones

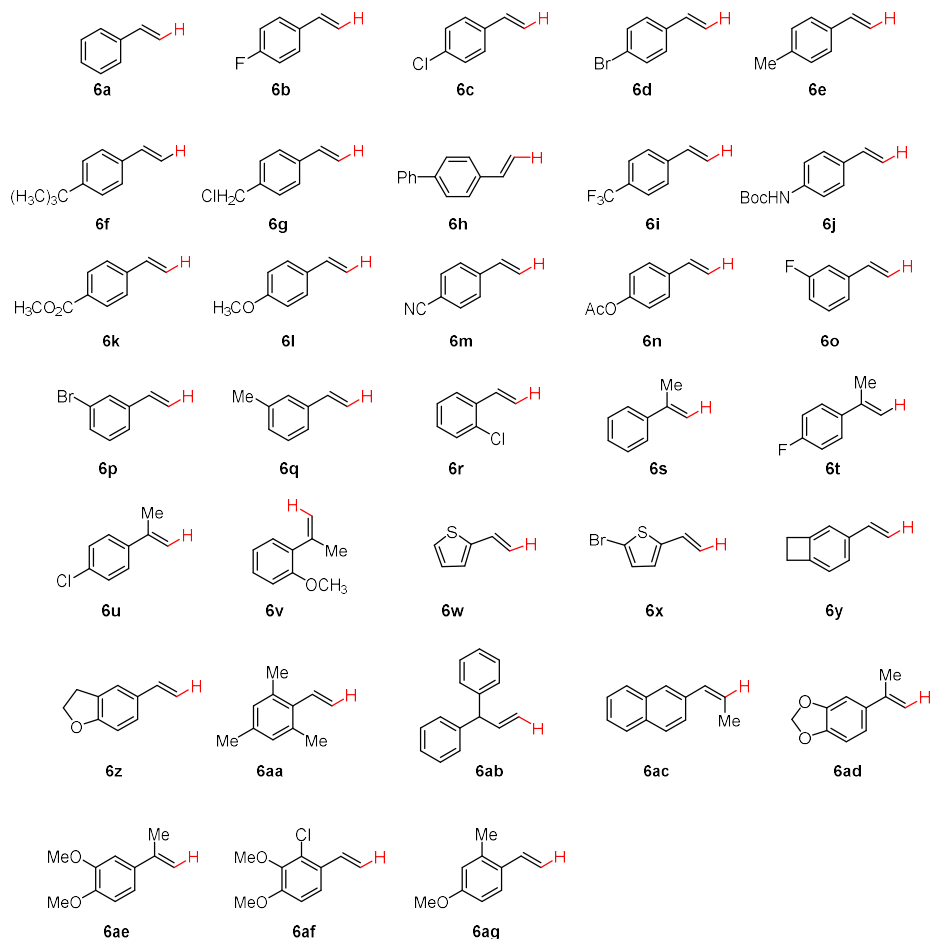

**3.1.** Substrates **6a**, **6b**, **6c**, **6d**, **6e**, **6f**, **6g**, **6h**, **6i**, **6k**, **6l**, **6m**, **6n**, **6o**, **6p**, **6q**, **6r**, **6s**, **6t**, **6u**, **6y**, **6aa**, **6ab**, **6ac** are commercially available.

**3.2.** Substrates **6v**, **6x**, **6z**, **6ad**, **6af**, **6ag** are known compounds and prepared according to the general procedure as below.

To a stirred suspension of (methyl)triphenylphosphonium bromide (4.57 mmol) in anhydrous THF, potassium tert-butoxide (3.96 mmol) was added under argon at 0 °C and stirred for 2 h. Then the solution of aromatic aldehyde or ketone (3.05 mmol) in anhydrous THF was added slowly and stirred for 30 minute. The mixture was mixed with water and the aqueous layer was extracted with ethyl acetate (3 x 15 mL). The combined organic extracts were dried over anhydrous Na<sub>2</sub>SO<sub>4</sub>, concentrated and

purified by silica gel column chromatography using petroleum ether and ethyl acetate as the diluent to afford expected product.

### Characteristic Data of Synthesized 6:

#### 1-Methoxy-2-(1-methylethenyl)benzene (6v)

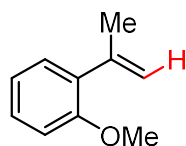

$^1\text{H NMR}$  (400 MHz,  $\text{CDCl}_3$ ):  $\delta$  7.31 – 7.21 (m, 2H), 7.00 – 6.89 (m, 2H), 5.25 – 5.06 (m, 2H), 3.87 (s, 3H), 2.19 – 2.14 (m, 3H) ppm;

$^{13}\text{C NMR}$  (100 MHz,  $\text{CDCl}_3$ ):  $\delta$  156.4, 144.1, 132.6, 129.2, 128.1, 120.3, 114.9, 110.6, 55.2, 23.0 ppm.

6v is a known compound.<sup>[S1]</sup>

#### 2-Bromo-5-ethenylthiophene (6x)

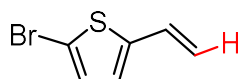

$^1\text{H NMR}$  (400 MHz,  $\text{CDCl}_3$ ):  $\delta$  6.90 (d,  $J = 3.7$  Hz, 1H), 6.78 – 6.63 (m, 2H), 5.46 (d,  $J = 17.2$  Hz, 1H), 5.13 (d,  $J = 11.0$  Hz, 1H) ppm;

$^{13}\text{C NMR}$  (100 MHz,  $\text{CDCl}_3$ ):  $\delta$  144.8, 130.3, 129.5, 126.2, 113.9, 111.4 ppm.

6x is a known compound.<sup>[S2]</sup>

#### 5-Ethenyl-2,3-dihydrobenzofuran (6z)

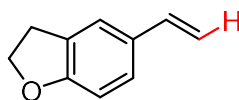

$^1\text{H NMR}$  (400 MHz,  $\text{CDCl}_3$ ):  $\delta$  7.30 (d,  $J = 1.9$  Hz, 1H), 7.16 (dd,  $J = 8.2, 1.8$  Hz, 1H), 6.77 – 6.61 (m, 2H), 5.58 (dt,  $J = 17.6, 1.0$  Hz, 1H), 5.13 – 5.05 (m, 1H), 4.58 (t,  $J = 8.7$  Hz, 2H), 3.20 (t,  $J = 8.7$  Hz, 2H) ppm;

$^{13}\text{C NMR}$  (100 MHz,  $\text{CDCl}_3$ ):  $\delta$  160.1, 136.7, 130.7, 127.5, 126.8, 122.5, 111.0, 109.3, 71.6, 29.7 ppm.

6z is a known compound.<sup>[S3]</sup>

#### 5-(1-Methylethenyl)-1,3-benzodioxole (6ad)



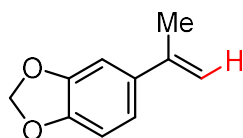

$^1\text{H NMR}$  (400 MHz,  $\text{CDCl}_3$ ):  $\delta$  7.02 – 6.92 (m, 2H), 6.78 (d,  $J = 8.1$  Hz, 1H), 5.95 (s, 2H), 5.26 (dd,  $J = 1.6, 0.8$  Hz, 1H), 5.00 (t,  $J = 1.5$  Hz, 1H), 2.17 – 2.08 (m, 3H) ppm;  
 $^{13}\text{C NMR}$  (100 MHz,  $\text{CDCl}_3$ ):  $\delta$  147.6, 146.8, 142.5, 135.4, 118.9, 111.1, 107.7, 105.8, 100.8, 21.9 ppm.

**6ad** is a known compound.<sup>[S4]</sup>

### 2-Chloro-1-ethenyl-3,4-dimethoxybenzene (6af)

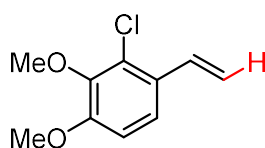

$^1\text{H NMR}$  (400 MHz,  $\text{CDCl}_3$ ):  $\delta$  7.29 (d,  $J = 8.7$  Hz, 1H), 7.03 (dd,  $J = 17.5, 11.0$  Hz, 1H), 6.82 (d,  $J = 8.7$  Hz, 1H), 5.62 (dd,  $J = 17.5, 1.2$  Hz, 1H), 5.27 (dd,  $J = 10.9, 1.2$  Hz, 1H), 3.87 (d,  $J = 7.0$  Hz, 6H) ppm;

$^{13}\text{C NMR}$  (100 MHz,  $\text{CDCl}_3$ ):  $\delta$  153.3, 145.5, 133.1, 129.6, 128.0, 121.5, 114.9, 110.8, 60.7, 56.2 ppm.

**6af** is a known compound.<sup>[S5]</sup>

### 1-Ethenyl-4-methoxy-2-methylbenzene (6ag)

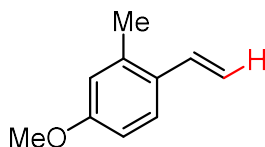

$^1\text{H NMR}$  (400 MHz,  $\text{CDCl}_3$ ):  $\delta$  7.44 (d,  $J = 8.5$  Hz, 1H), 6.89 (dd,  $J = 17.4, 11.0$  Hz, 1H), 6.79 – 6.69 (m, 2H), 5.55 (dd,  $J = 17.5, 1.5$  Hz, 1H), 5.19 (dd,  $J = 11.0, 1.5$  Hz, 1H), 3.81 (s, 3H), 2.35 (s, 3H) ppm;

$^{13}\text{C NMR}$  (100 MHz,  $\text{CDCl}_3$ ):  $\delta$  158.9, 136.7, 134.0, 129.4, 126.3, 115.2, 112.9, 111.4, 55.0, 19.7 ppm.

**6ag** is a known compound.<sup>[S6]</sup>

## 3.3 Substrate **6j** was prepared as following

### tert-Butyl (4-vinylphenyl)carbamate (**6j**)

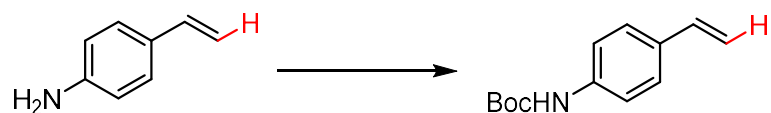

4-Vinylaniline (1.0 equiv., 12.8 mmol, 1.5 mL) was added to a solution of di-tert-butyl dicarbonate (1.1 equiv., 14 mmol, 3.06 g) and DMAP (0.01 eq, 0.13 mmol, 15.67 mg) in MeCN (16 mL). The reaction mixture was stirred for 23 h at ambient temperature. After that time ethyl acetate (30 mL) was added and the layers separated. The aqueous layer was extracted with ethyl acetate (3x10 mL). The combined organic layers were washed with brine and dried over anhydrous Na<sub>2</sub>SO<sub>4</sub>. After filtration the solvent was removed under reduced pressure. The crude product was purified by column chromatography through a silica gel column using petroleum ether/EtOAc (10:1) as eluent to afford **6j** (12 mmol, 2,70 g, 97%) as a white solid.

<sup>1</sup>H NMR (400 MHz, CDCl<sub>3</sub>): δ 7.33 (d, J = 2.6 Hz, 4H), 6.65 (dd, J = 17.6, 10.9 Hz, 1H), 6.48 (s, 1H), 5.65 (dd, J = 17.6, 0.9 Hz, 1H), 5.16 (dd, J = 10.8, 0.9 Hz, 1H), 1.52 (s, 9H) ppm;

<sup>13</sup>C NMR (100 MHz, CDCl<sub>3</sub>): δ 152.77, 138.06, 136.33, 132.65, 126.99, 118.54, 112.53, 28.47 ppm.

**6j** is a known compound.<sup>[S7]</sup>

#### 4. General procedure for the direct nitration of aryl alkenes **6** with DNDMH

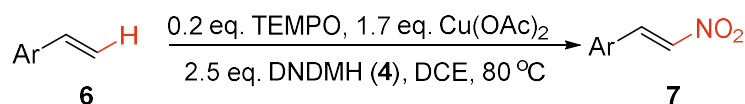

To an oven-dried reaction glass tube charged with a magnetic stir-bar was added alkenes **5** (0.48 mmol), TEMPO (0.096 mmol), DNDMH (0.96 mmol) and Cu(OAc)<sub>2</sub> (0.82 mmol). Under nitrogen atmosphere, 2 mL DCE was added with a laboratory syringe. The mixture was stirred at 80 °C into an oil bath for 6 h. The reaction was monitored by TLC analysis. Until the completion the solvent was evaporated under

reduced pressure. The residue was purified with silica gel column chromatography with petroleum ether/EtOAc as the eluent.

### Characteristic Data of Synthesized Nitralknes 7:

#### (E)-(2-nitrovinyl)benzene (7a)

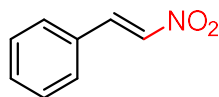

Yield of **7a** 96%, 74 mg; yellow solid; **mp** 57-58 °C;  $R_f = 0.5$  (silica, PE:EtOAc = 20:1);

**<sup>1</sup>H NMR** (400 MHz, CDCl<sub>3</sub>): 7.44 – 7.48 (m, 2H), 7.49 – 7.52 (m, 1H), 7.54 – 7.57 (m, 2H), 7.57 – 7.61 (dd,  $J = 13.7, 1.1$  Hz, 1H), 7.99 – 8.02 (dd,  $J = 13.7, 1.8$  Hz, 1H) ppm;

**<sup>13</sup>C NMR** (100 MHz, CDCl<sub>3</sub>):  $\delta$  139.2, 137.2, 132.3, 130.2, 129.5, 129.3 ppm;

**HRMS (ESI)**  $m/z$ :  $[M+Na]^+$  calculated for C<sub>8</sub>H<sub>7</sub>NNaO<sub>2</sub><sup>+</sup> 172.0369, found 172.0317;

**IR** (film)  $\nu_{max} = 3332, 2953, 2917, 2850, 1736, 1694, 1595, 1457, 1376, 1262, 1044, 1020, 890, 875, 807, 770, 742$ .

**7a** is a known compound.<sup>[S8]</sup>

#### (E)-1-fluoro-4-(2-nitrovinyl)benzene (7b)

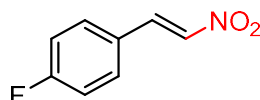

Yield of **7b** 80%, 50 mg; yellow solid; **mp** 102-103 °C;  $R_f = 0.5$  (silica, PE:EtOAc = 20:1);

**<sup>1</sup>H NMR** (400 MHz, CDCl<sub>3</sub>):  $\delta$  7.98 (d,  $J = 13.7$  Hz, 1H), 7.60 – 7.50 (m, 3H), 7.15 (t,  $J = 8.5$  Hz, 2H) ppm;

**<sup>13</sup>C NMR** (100 MHz, CDCl<sub>3</sub>):  $\delta$  165.4 (d,  $J = 177.52$  Hz), 138.0, 137.0, 131.4 (d,  $J = 9.0$  Hz), 126.5, 116.9 (d,  $J = 22.3$  Hz) ppm;

**HRMS (ESI)**  $m/z$ :  $[M+Na]^+$  calculated for C<sub>8</sub>H<sub>6</sub>FNNaO<sub>2</sub><sup>+</sup> 190.0274, found 190.0274;

**IR** (film)  $\nu_{max} = 3116, 2964, 2919, 2851, 1638, 1593, 1503, 1345, 1232, 1170, 978, 882$ .

**7b** is a known compound.<sup>[S8]</sup>

**(E)-1-chloro-4-(2-nitrovinyl)benzene (7c)**

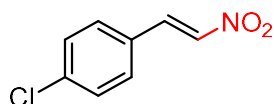

Yield of **7c** 64%, 42 mg; yellow solid; **mp** 113-114 °C;  $R_f = 0.5$  (silica, PE:EtOAc = 20:1);

**<sup>1</sup>H NMR** (400 MHz, CDCl<sub>3</sub>):  $\delta$  7.95 (dd,  $J = 13.7, 7.1$  Hz, 1H), 7.64 – 7.38 (m, 5H) ppm;

**<sup>13</sup>C NMR** (100 MHz, CDCl<sub>3</sub>):  $\delta$  137.9, 137.6, 132.9, 130.5, 130.4, 129.9 ppm;

**IR** (film)  $\nu_{\max} = 3365, 3184, 2925, 2845, 2361, 1723, 1638, 1458, 1424, 1368, 1086, 1018, 956, 810, 724, 640$ .

**7c** is a known compound.<sup>[S8]</sup>

**(E)-1-bromo-4-(2-nitrovinyl)benzene (7d)**

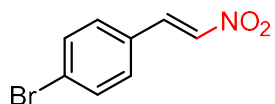

Yield of **7d** 48%, 30 mg; yellow solid; **mp** 141-144 °C;  $R_f = 0.5$  (silica, PE:EtOAc = 20:1);

**<sup>1</sup>H NMR** (400 MHz, CDCl<sub>3</sub>):  $\delta$  7.94 (d,  $J = 13.7$  Hz, 1H), 7.60 – 7.56 (m, 3H), 7.42 – 7.40 (m, 2H) ppm;

**<sup>13</sup>C NMR** (100 MHz, CDCl<sub>3</sub>):  $\delta$  137.9, 137.6, 132.9, 130.5, 129.1, 126.9 ppm;

**IR** (film)  $\nu_{\max} = 3743, 3111, 2919, 2857, 2366, 2343, 1633, 1520, 1351, 1250, 1187, 1080, 968, 815, 668$ .

**7d** is a known compound.<sup>[S9]</sup>

**(E)-1-methyl-4-(2-nitrovinyl)benzene (7e)**

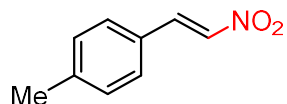

Yield of **7e** 98%, 42 mg; yellow solid; **mp** 106-107 °C;  $R_f = 0.5$  (silica, PE:EtOAc = 20:1);

**<sup>1</sup>H NMR** (400 MHz, CDCl<sub>3</sub>):  $\delta$  7.97 (d,  $J = 13.6$  Hz, 1H), 7.56 (d,  $J = 13.7$  Hz, 1H), 7.45 – 7.43 (m, 2H), 7.24 (s, 1H), 2.40 (s, 3H) ppm;

$^{13}\text{C}$  NMR (100 MHz,  $\text{CDCl}_3$ ):  $\delta$  143.2, 139.3, 136.3, 130.2, 129.3, 127.3, 21.7 ppm;

IR (film)  $\nu_{\text{max}}$  = 3111, 2925, 2863, 1644, 1599, 1520, 1503, 1424, 1340, 1272, 1182, 973, 815, 730.

**7e** is a known compound.<sup>[S8]</sup>

**(E)-(2-nitrovinyl)benzene (7f)**

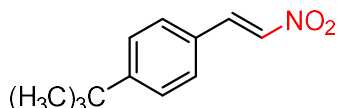

Yield of **7f** 92%, 62 mg; yellow liquid;  $R_f$  = 0.5 (silica, PE:EtOAc = 20:1);

$^1\text{H}$  NMR (400 MHz,  $\text{CDCl}_3$ ):  $\delta$  8.00 (d,  $J$  = 13.6 Hz, 1H), 7.58 (d,  $J$  = 13.7 Hz, 1H), 7.51 – 7.46 (m, 4H), 1.34 (s, 9H) ppm;

$^{13}\text{C}$  NMR (100 MHz,  $\text{CDCl}_3$ ):  $\delta$  156.3, 139.2, 136.6, 129.2, 127.4, 126.6, 35.3, 31.2 ppm;

HRMS (ESI)  $m/z$ :  $[\text{M}+\text{Na}]^+$  calculated for  $\text{C}_{12}\text{H}_{15}\text{NNaO}_2^+$  228.0995, found 228.0989;

IR (film)  $\nu_{\text{max}}$  = 3105, 2969, 2930, 2372, 2338, 1644, 1526, 1345, 1278, 1182, 1114, 973, 820, 674.

**7f** is a known compound.<sup>[S10]</sup>

**(E)-1-(chloromethyl)-4-(2-nitrovinyl)benzene (7g)**

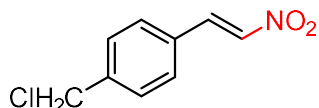

Yield of **7g** 94%, 66 mg; yellow solid;  $R_f$  = 0.5 (silica, PE:EtOAc = 20:1);

$^1\text{H}$  NMR (400 MHz,  $\text{CDCl}_3$ ):  $\delta$  8.00 (d,  $J$  = 13.7 Hz, 1H), 7.60 – 7.54 (m, 3H), 7.48 (d,  $J$  = 8.2 Hz, 2H), 4.61 (s, 2H) ppm;

$^{13}\text{C}$  NMR (100 MHz,  $\text{CDCl}_3$ ):  $\delta$  142.0, 138.4, 137.6, 130.2, 129.7, 129.6, 45.4 ppm;

HRMS (ESI)  $m/z$ :  $[\text{M}+\text{H}]^+$  calculated for  $\text{C}_{10}\text{H}_5\text{ClNNaO}_2^+$  198.0316, found 198.0355;

IR (film)  $\nu_{\text{max}}$  = 3122, 3049, 2969, 2930, 2845, 2372, 1633, 1526, 1509, 1413, 1345, 1272, 1204, 973, 820, 798, 730, 674.

**7g** is a known compound.<sup>[S9]</sup>

**(E)-4-(2-nitrovinyl)-1,1'-biphenyl (7h)**

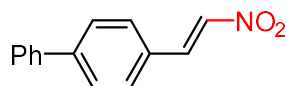

Yield of **7h** 82%, 70 mg; yellow solid; **mp** 190-192 °C;  $R_f = 0.5$  (silica, PE:EtOAc = 20:1);

**<sup>1</sup>H NMR** (400 MHz, CDCl<sub>3</sub>):  $\delta$  8.05 (d,  $J = 13.6$  Hz, 1H), 7.70 – 7.61 (m, 7H), 7.50 – 7.39 (m, 3H) ppm;

**<sup>13</sup>C NMR** (100 MHz, CDCl<sub>3</sub>):  $\delta$  145.1, 139.6, 138.9, 137.0, 129.8, 129.2, 129.0, 128.5, 128.1, 127.2 ppm;

**IR** (film)  $\nu_{\max} = 3404, 3179, 3111, 2964, 2919, 2857, 1633, 1605, 1560, 1498, 1407, 1340, 1255, 1187, 978, 826, 770, 730, 691$ .

**7h** is a known compound.<sup>[S10]</sup>

**(E)-1-(2-nitrovinyl)-4-(trifluoromethyl)benzene (7i)**

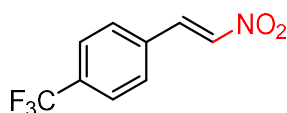

Yield of **7i** 92%, 58 mg; yellow solid; **mp** 90-92 °C;  $R_f = 0.5$  (silica, PE:EtOAc = 20:1);

**<sup>1</sup>H NMR** (400 MHz, CDCl<sub>3</sub>):  $\delta$  8.02 (d,  $J = 13.8$  Hz, 1H), 7.70 (q,  $J = 8.4$  Hz, 4H), 7.63 (d,  $J = 13.7$  Hz, 1H) ppm;

**<sup>13</sup>C NMR** (100 MHz, CDCl<sub>3</sub>):  $\delta$  139.0, 137.3, 133.8-133 (q,  $J = 32.76, 30.24$  Hz), 129.4, 126.31-126.31 (q,  $J = 16.38, 3.78$  Hz), 124.6, 122.4 ppm;

**IR** (film)  $\nu_{\max} = 3116, 2925, 2845, 1661, 1526, 1413, 1340, 1317, 1170, 1120, 1074, 968, 838, 748$ .

**7i** is a known compound.<sup>[S11]</sup>

**tert-butyl (E)-(4-(2-nitrovinyl)phenyl)carbamate (7j)**

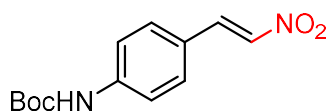

Yield of **7j** 83%, 50 mg; yellow solid; **mp** 143-145 °C;  $R_f = 0.5$  (silica, PE:EtOAc = 20:1);

**<sup>1</sup>H NMR** (400 MHz, CDCl<sub>3</sub>): δ 7.93 (d, *J* = 13.6 Hz, 1H), 7.51 (d, *J* = 13.6 Hz, 1H), 7.45 (s, 4H), 1.50 (s, 9H) ppm;

**<sup>13</sup>C NMR** (100 MHz, CDCl<sub>3</sub>): δ 152.3, 142.4, 139.0, 135.6, 130.6, 124.4, 118.6, 81.6, 28.4 ppm;

**IR** (film) *v*<sub>max</sub> = 3337, 2925, 2851, 2366, 1734, 1599, 1531, 1424, 1345, 1317, 1232, 1154, 1052, 978, 820, 776.

**methyl (E)-4-(2-nitrovinyl)benzoate (7k)**

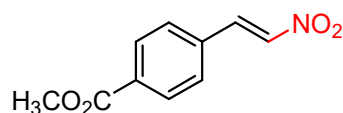

Yield of **7k** 94%, 60 mg; yellow solid; **mp** 176-178 °C; *R*<sub>f</sub> = 0.5 (silica, PE:EtOAc = 6:1);

**<sup>1</sup>H NMR** (400 MHz, CDCl<sub>3</sub>): δ 8.14 – 8.08 (m, 2H), 8.01 (d, *J* = 13.8 Hz, 1H), 7.67 – 7.59 (m, 3H), 3.95 (s, 3H) ppm;

**<sup>13</sup>C NMR** (100 MHz, CDCl<sub>3</sub>): δ 166.1, 138.8, 137.7, 134.3, 133.2, 130.6, 129.1, 52.7 ppm;

**IR** (film) *v*<sub>max</sub> = 3393, 3105, 2953, 2919, 2857, 2366, 1718, 1644, 1571, 1526, 1464, 1390, 1345, 1289, 1092, 1018, 962, 764.

**7k** is a known compound.<sup>[S8]</sup>

**(E)-1-methoxy-4-(2-nitrovinyl)benzene (7l)**

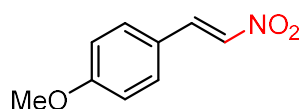

Yield of **7l** 93%, 57 mg; yellow solid; **mp** 87-90 °C; *R*<sub>f</sub> = 0.5 (silica, PE:EtOAc = 20:1);

**<sup>1</sup>H NMR** (400 MHz, CDCl<sub>3</sub>): δ 7.97 (d, *J* = 13.6 Hz, 1H), 7.57 – 7.46 (m, 3H), 6.95 (d, *J* = 8.9 Hz, 2H), 3.86 (s, 3H) ppm;

**<sup>13</sup>C NMR** (100 MHz, CDCl<sub>3</sub>): δ 163.1, 139.2, 135.1, 131.3, 122.6, 115.0, 55.6 ppm;

**HRMS (ESI)** *m/z*: [M+Na]<sup>+</sup> calculated for C<sub>9</sub>H<sub>9</sub>NNaO<sub>3</sub><sup>+</sup> 202.0474, found 202.0453;

**IR** (film) *v*<sub>max</sub> = 3737, 3404, 3116, 2969, 2930, 2845, 2366, 2332, 1610, 1498, 1430, 1351, 1250, 1176, 1030, 973, 843, 798, 668.

**7l** is a known compound.<sup>[S8]</sup>

**(E)-4-(2-nitrovinyl)benzonitrile (7m)**

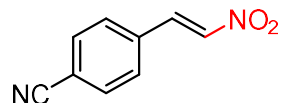

Yield of **7m** 96%, 65 mg; yellow solid; **mp** 186-187 °C;  $R_f = 0.5$  (silica, PE:EtOAc = 10:1);

**<sup>1</sup>H NMR** (400 MHz, CDCl<sub>3</sub>):  $\delta$  7.99 (d,  $J = 13.7$  Hz, 1H), 7.79 – 7.72 (m, 2H), 7.71 – 7.59 (m, 3H) ppm;

**<sup>13</sup>C NMR** (100 MHz, CDCl<sub>3</sub>):  $\delta$  139.6, 136.7, 134.5, 133.1, 129.5, 117.9, 115.3 ppm;

**IR** (film)  $\nu_{max} = 3099, 2953, 2913, 2851, 2231, 1734, 1644, 1565, 1531, 1480, 1464, 1379, 1345, 1260, 968, 832$ .

**7m** is a known compound.<sup>[S8]</sup>

**(E)-4-(2-nitrovinyl)phenyl acetate (7n)**

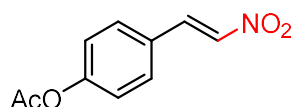

Yield of **7n** 86%, 55 mg; yellow solid; **mp** 176-178 °C;  $R_f = 0.5$  (silica, PE:EtOAc = 6:1);

**<sup>1</sup>H NMR** (400 MHz, CDCl<sub>3</sub>):  $\delta$  8.04 (d,  $J = 13.7$  Hz, 1H), 7.66 – 7.58 (m, 3H), 7.25 (d,  $J = 8.6$  Hz, 2H), 2.38 (s, 3H) ppm;

**<sup>13</sup>C NMR** (100 MHz, CDCl<sub>3</sub>):  $\delta$  169.0, 153.6, 138.2, 137.2, 130.5, 127.8, 122.9, 21.3 ppm;

**HRMS (ESI)**  $m/z$ :  $[M+H]^+$  calculated for C<sub>10</sub>H<sub>10</sub>NO<sub>4</sub><sup>+</sup> 208.0604, found 208.0632;

**IR** (film)  $\nu_{max} = 3404, 2959, 2925, 2851, 1751, 1565, 1509, 1374, 1204, 1164, 1012, 916, 860$ .

**7n** is a known compound.<sup>[S10]</sup>

**(E)-1-fluoro-3-(2-nitrovinyl)benzene (7o)**

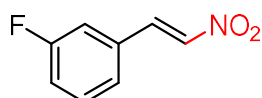

Yield of **7o** 64%, 46 mg; yellow liquid;  $R_f = 0.5$  (silica, PE:EtOAc = 20:1);



**<sup>1</sup>H NMR** (400 MHz, CDCl<sub>3</sub>): δ 7.95 (d, *J* = 13.7 Hz, 1H), 7.56 (d, *J* = 13.7 Hz, 1H), 7.44 (td, *J* = 7.9, 5.7 Hz, 1H), 7.34 (dt, *J* = 7.7, 1.4 Hz, 1H), 7.27 – 7.17 (m, 2H) ppm;  
**<sup>13</sup>C NMR** (100 MHz, CDCl<sub>3</sub>): δ 163.0 (d, *J* = 247.03 Hz), 138.2, 137.8 (d, *J* = 2.71 Hz), 132.2, 131.2, 125.3 (d, *J* = 3 Hz), 119.1 (d, *J* = 21.3 Hz), 115.5 (d, *J* = 22.4 Hz) ppm;  
**IR** (film) *v*<sub>max</sub> = 3111, 2947, 2925, 2845, 2355, 2338, 1627, 1576, 1514, 1486, 1447, 1340, 1266, 1216, 1154, 962, 849, 786, 724, 668.

**7o** is a known compound.<sup>[S12]</sup>

**(E)-1-bromo-3-(2-nitrovinyl)benzene (7p)**

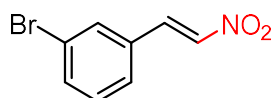

Yield of **7p** 74%, 46 mg; yellow solid; **mp** 59-61 °C; *R*<sub>f</sub> = 0.5 (silica, PE:EtOAc = 20:1);

**<sup>1</sup>H NMR** (400 MHz, CDCl<sub>3</sub>): δ 7.91 (d, *J* = 13.8 Hz, 1H), 7.68 (t, *J* = 1.8 Hz, 1H), 7.61 (ddd, *J* = 8.0, 1.9, 1.0 Hz, 1H), 7.55 (d, *J* = 13.7 Hz, 1H), 7.48 (dt, *J* = 7.8, 1.5 Hz, 1H), 7.33 (t, *J* = 7.9 Hz, 1H) ppm;

**<sup>13</sup>C NMR** (100 MHz, CDCl<sub>3</sub>): δ 138.1, 137.5, 135.0, 132.1, 131.8, 131.0, 127.8, 123.5 ppm;

**IR** (film) *v*<sub>max</sub> = 3105, 2959, 2925, 2857, 2372, 1638, 1582, 1526, 1480, 1452, 1345, 1272, 1221, 1142, 962, 838, 781, 724, 668.

**7p** is a known compound.<sup>[S13]</sup>

**(E)-1-methyl-3-(2-nitrovinyl)benzene (7q)**

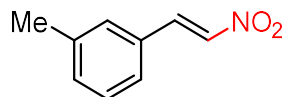

Yield of **7q** 75%, 54 mg; yellow liquid; *R*<sub>f</sub> = 0.5 (silica, PE:EtOAc = 20:1);

**<sup>1</sup>H NMR** (400 MHz, CDCl<sub>3</sub>): δ 7.98 (d, *J* = 13.6 Hz, 1H), 7.58 (d, *J* = 13.7 Hz, 1H), 7.38 – 7.28 (m, 4H), 2.40 (s, 3H) ppm;

**<sup>13</sup>C NMR** (100 MHz, CDCl<sub>3</sub>): δ 139.4, 139.3, 137.0, 133.2, 130.1, 129.8, 129.4, 126.5, 21.4 ppm;

**IR** (film) *v*<sub>max</sub> = 3737, 3635, 2959, 2919, 2845, 2355, 2332, 1638, 1514, 1351, 968,

668.

**7q** is a known compound.<sup>[S13]</sup>

**(E)-1-chloro-2-(2-nitrovinyl)benzene (7r)**

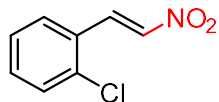

Yield of **7r** 79%, 53 mg; yellow liquid;  $R_f = 0.5$  (silica, PE:EtOAc = 20:1);

**<sup>1</sup>H NMR** (400 MHz, CDCl<sub>3</sub>):  $\delta$  8.40 (d,  $J = 13.7$  Hz, 1H), 7.62 – 7.56 (m, 2H), 7.49 (dd,  $J = 8.1, 1.4$  Hz, 1H), 7.43 (td,  $J = 7.7, 1.7$  Hz, 1H), 7.34 (td,  $J = 7.5, 1.4$  Hz, 1H) ppm;

**<sup>13</sup>C NMR** (100 MHz, CDCl<sub>3</sub>):  $\delta$  138.9, 136.2, 135.2, 133.0, 130.9, 128.7, 128.6, 127.6 ppm;

**HRMS (ESI)**  $m/z$ :  $[M+Na]^+$  calculated for C<sub>8</sub>H<sub>6</sub>ClNNO<sub>2</sub><sup>+</sup> 205.9979, found 205.9914;

**IR** (film)  $\nu_{max} = 3399, 3122, 2930, 2834, 1633, 1593, 1509, 1469, 1441, 1334, 1289, 1052, 962, 849, 758, 691$ .

**7r** is a known compound.<sup>[S9]</sup>

**(1-nitroprop-1-en-2-yl)benzene (7s)**

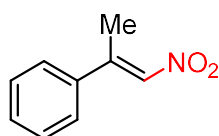

Yield of **7s** 83%, 83 mg; yellow liquid;  $R_f = 0.5$  (silica, PE:EtOAc = 20:1);

**<sup>1</sup>H NMR** (400 MHz, CDCl<sub>3</sub>):  $\delta$  7.45 (s, 5H), 7.31 (d,  $J = 1.5$  Hz, 1H), 2.65 (d,  $J = 1.5$  Hz, 3H) ppm;

**<sup>13</sup>C NMR** (100 MHz, CDCl<sub>3</sub>):  $\delta$  150.1, 138.4, 136.4, 130.5, 129.1, 126.9, 18.7 ppm;

**HRMS (ESI)**  $m/z$ :  $[M+K]^+$  calculated for C<sub>9</sub>H<sub>9</sub>NKO<sub>2</sub><sup>+</sup> 202.0264, found 202.0286;

**IR** (film)  $\nu_{max} = 3111, 2953, 2925, 2857, 2366, 2327, 1622, 1520, 1340, 781, 708$ .

**7s** is a known compound.<sup>[S14]</sup>

**1-fluoro-4-(1-nitroprop-1-en-2-yl)benzene (7t)**

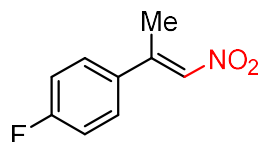

Yield of **7t** 60%, 40 mg; yellow liquid;  $R_f = 0.5$  (silica, PE:EtOAc = 20:1);

$^1\text{H NMR}$  (400 MHz,  $\text{CDCl}_3$ ):  $\delta$  7.49 – 7.42 (m, 2H), 7.28 (d,  $J = 1.5$  Hz, 1H), 7.12 (t,  $J = 8.6$  Hz, 2H), 2.62 (d,  $J = 1.5$  Hz, 3H) ppm;

$^{13}\text{C NMR}$  (100 MHz,  $\text{CDCl}_3$ ):  $\delta$  164.0 (d,  $J = 249.75$  Hz), 148.8, 136.3, 134.3 (d,  $J = 3.51$  Hz), 129.0 (d,  $J = 8.67$  Hz), 116.2 (d,  $J = 21.79$  Hz), 18.6 ppm;

**HRMS (ESI)**  $m/z$ :  $[\text{M}+\text{Na}]^+$  calculated for  $\text{C}_9\text{H}_8\text{FNNaO}_2^+$  204.0431, found 204.0430;

**IR** (film)  $\nu_{\text{max}} = 3105, 2919, 2851, 2372, 1610, 1509, 1340, 1238, 1164, 1108, 1018, 916, 838, 719$ .

**7t** is a known compound.<sup>[S2]</sup>

#### 1-chloro-4-(1-nitroprop-1-en-2-yl)benzene (**7u**)

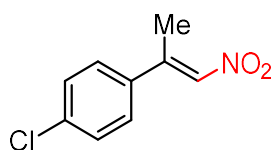

Yield of **7u** 92%, 60 mg; yellow liquid;  $R_f = 0.5$  (silica, PE:EtOAc = 20:1);

$^1\text{H NMR}$  (400 MHz,  $\text{CDCl}_3$ ):  $\delta$  7.45 – 7.36 (m, 4H), 7.28 (d,  $J = 1.5$  Hz, 1H), 2.62 (d,  $J = 1.5$  Hz, 3H) ppm;

$^{13}\text{C NMR}$  (100 MHz,  $\text{CDCl}_3$ ):  $\delta$  148.6, 136.7, 136.7, 136.5, 129.4, 128.3, 18.5 ppm;

**HRMS (ESI)**  $m/z$ :  $[\text{M}+\text{Na}]^+$  calculated for  $\text{C}_9\text{H}_8\text{ClNNaO}_2^+$  220.0135, found 220.0132;

**IR** (film)  $\nu_{\text{max}} = 3099, 2919, 2857, 2361, 1622, 1588, 1554, 1509, 1492, 1340, 1097, 1012, 922, 820, 753$ .

**7u** is a known compound.<sup>[S3]</sup>

#### 1-methoxy-2-(1-nitroprop-1-en-2-yl)benzene (**7v**)

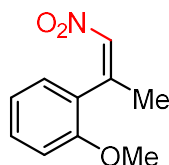

Yield of **7v** 61%, 39 mg; yellow liquid;  $R_f = 0.5$  (silica, PE:EtOAc = 20:1);

**<sup>1</sup>H NMR** (400 MHz, CDCl<sub>3</sub>): δ 7.38 (ddd, *J* = 8.3, 7.5, 1.8 Hz, 1H), 7.15 (dq, *J* = 4.2, 1.9 Hz, 2H), 7.01 – 6.93 (m, 2H), 3.85 (s, 3H), 2.56 (d, *J* = 1.6 Hz, 3H).

**<sup>13</sup>C NMR** (100 MHz, CDCl<sub>3</sub>): δ 156.7, 150.3, 137.6, 131.0, 128.9, 128.2, 120.8, 111.4, 55.6, 20.1;

**HRMS (ESI)** *m/z*: [M+Na]<sup>+</sup> calculated for C<sub>10</sub>H<sub>12</sub>NO<sub>3</sub><sup>+</sup> 194.0811, found 194.0878;

**IR** (film) *v*<sub>max</sub> = 3111, 2953, 2930, 2845, 2361, 1605, 1554, 1520, 1492, 1464, 1436, 1340, 1245, 1182, 1131, 1030, 753.

**7v** is a known compound.<sup>[S3]</sup>

**(E)-2-(2-nitrovinyl)thiophene (7w)**

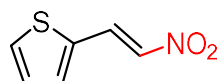

Yield of **7w** 43%, 30 mg; yellow solid; **mp** 82-84 °C; *R<sub>f</sub>* = 0.6 (silica, PE:EtOAc = 20:1);

**<sup>1</sup>H NMR** (400 MHz, CDCl<sub>3</sub>): δ 8.15 (d, *J* = 13.3 Hz, 1H), 7.57 (dd, *J* = 5.0, 1.0 Hz, 1H), 7.52 – 7.43 (m, 2H), 7.15 (dd, *J* = 5.1, 3.7 Hz, 1H) ppm;

**<sup>13</sup>C NMR** (100 MHz, CDCl<sub>3</sub>): δ 135.5, 134.8, 133.9, 132.2, 131.8, 129.0 ppm;

**IR** (film) *v*<sub>max</sub> = 3105, 3093, 3031, 2925, 2851, 2361, 1622, 1526, 1492, 1362, 1334, 1232, 1193, 1051, 973, 950, 854, 815, 730.

**7w** is a known compound.<sup>[S15]</sup>

**(E)-2-bromo-5-(2-nitrovinyl)thiophene (7x)**

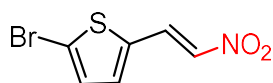

Yield of **7x** 92%, 57 mg; yellow solid; **mp** 82-84 °C; *R<sub>f</sub>* = 0.6 (silica, PE:EtOAc = 20:1);

**<sup>1</sup>H NMR** (400 MHz, CDCl<sub>3</sub>): δ 8.02 (d, *J* = 13.5 Hz, 1H), 7.38 (d, *J* = 13.4 Hz, 1H), 7.21 (d, *J* = 3.9 Hz, 1H), 7.12 (d, *J* = 3.9 Hz, 1H) ppm;

**<sup>13</sup>C NMR** (100 MHz, CDCl<sub>3</sub>): δ 135.6, 135.4, 135.2, 132.0, 131.2, 119.8 ppm;

**IR** (film) *v*<sub>max</sub> = 3399, 3189, 3093, 2959, 2919, 2851, 2361, 1729, 1638, 1616, 1531, 1458, 1424, 1322, 1131, 810, 719.

7x is a known compound.<sup>[S8]</sup>

**(E)-3-(2-nitrovinyl)bicyclo[4.2.0]octa-1,3,5-triene (7y)**

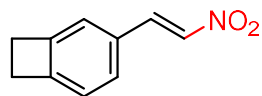

Yield of **7y** 74%, 50 mg; yellow solid; **mp** 124-126 °C;  $R_f = 0.6$  (silica, PE:EtOAc = 20:1);

**<sup>1</sup>H NMR** (400 MHz, CDCl<sub>3</sub>):  $\delta$  8.01 (d,  $J = 13.6$  Hz, 1H), 7.57 (d,  $J = 13.6$  Hz, 1H), 7.39 (dd,  $J = 7.6, 1.5$  Hz, 1H), 7.26 (s, 1H), 7.16 (d,  $J = 13.6$  Hz, 1H), 3.25 (s, 4H) ppm;

**<sup>13</sup>C NMR** (100 MHz, CDCl<sub>3</sub>):  $\delta$  151.5, 147.2, 140.6, 136.0, 129.4, 128.9, 123.7, 122.4, 30.1, 29.5 ppm;

**IR** (film)  $\nu_{\max} = 3111, 2919, 2851, 1627, 1605, 1503, 1436, 1351, 1272, 1204, 968, 826$ .

**(E)-5-(2-nitrovinyl)-2,3-dihydrobenzofuran (7z)**

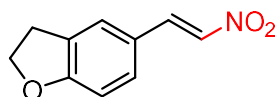

Yield of **7z** 55%, 37 mg; yellow liquid;  $R_f = 0.6$  (silica, PE:EtOAc = 20:1);

**<sup>1</sup>H NMR** (400 MHz, CDCl<sub>3</sub>):  $\delta$  7.96 (d,  $J = 13.5$  Hz, 1H), 7.50 (d,  $J = 13.5$  Hz, 1H), 7.44 – 7.31 (m, 2H), 6.83 (d,  $J = 8.3$  Hz, 1H), 4.67 (t,  $J = 8.7$  Hz, 2H), 3.26 (t,  $J = 8.7$  Hz, 2H) ppm;

**<sup>13</sup>C NMR** (100 MHz, CDCl<sub>3</sub>):  $\delta$  164.2, 139.7, 134.6, 131.5, 129.1, 125.8, 122.7, 110.5, 72.4, 29.2 ppm;

**IR** (film)  $\nu_{\max} = 3365, 3184, 2925, 2857, 2186, 1638, 1498, 1475, 1334, 1250, 1102, 984, 815, 714$ .

**(E)-1,3,5-trimethyl-2-(2-nitrovinyl)benzene (7aa)**

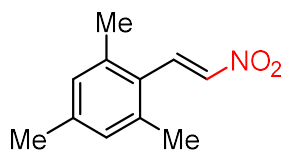

Yield of **7aa** 57%, 37 mg; yellow solid; **mp** 123-124 °C;  $R_f = 0.6$  (silica, PE:EtOAc = 20:1);

**<sup>1</sup>H NMR** (400 MHz, CDCl<sub>3</sub>): δ 8.27 (d, *J* = 13.9 Hz, 1H), 7.30 (d, *J* = 13.9 Hz, 1H), 6.95 (s, 2H), 2.39 (s, 6H), 2.32 (s, 3H) ppm;

**<sup>13</sup>C NMR** (100 MHz, CDCl<sub>3</sub>): δ 141.0, 139.7, 138.6, 136.6, 130.0, 125.8, 21.6, 21.3 ppm;

**IR** (film) *v*<sub>max</sub> = 3133, 2964, 2930, 2851, 1633, 1605, 1503, 1334, 1148, 1046, 973, 922, 849, 730.

**7aa** is a known compound.<sup>[S8]</sup>

**(2-nitroethene-1,1-diyl)dibenzene (7ab)**

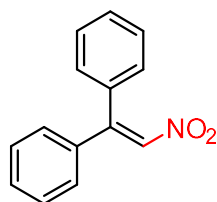

Yield of **7aa** 64%, 40 mg; yellow liquid; *R*<sub>f</sub> = 0.6 (silica, PE:EtOAc = 20:1);

**<sup>1</sup>H NMR** (400 MHz, CDCl<sub>3</sub>): δ 7.52 – 7.39 (m, 7H), 7.33 – 7.23 (m, 4H) ppm;

**<sup>13</sup>C NMR** (100 MHz, CDCl<sub>3</sub>): δ 150.6, 137.2, 135.7, 134.5, 131.0, 129.4, 129.1, 129.0, 128.9, 128.6 ppm;

**IR** (film) *v*<sub>max</sub> = 3111, 2959, 2925, 2857, 1638, 1560, 1520, 1469, 1334, 1255, 1198, 968, 900, 838, 786, 668.

**7ab** is a known compound.<sup>[S8]</sup>

**2-(1-nitroprop-1-en-2-yl)naphthalene (7ac)**

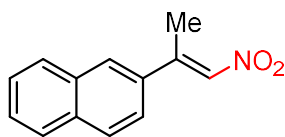

Yield of **7ac** 79%, 50 mg; yellow liquid; *R*<sub>f</sub> = 0.6 (silica, PE:EtOAc = 20:1);

**<sup>1</sup>H NMR** (400 MHz, CDCl<sub>3</sub>): δ 7.96 – 7.84 (m, 4H), 7.61 – 7.41 (m, 4H), 2.73 (d, *J* = 1.5 Hz, 3H) ppm;

**<sup>13</sup>C NMR** (100 MHz, CDCl<sub>3</sub>): δ 149.9, 136.6, 135.4, 134.0, 133.0, 129.0, 128.7, 127.8, 127.6, 127.1, 123.7, 18.6 ppm;

**HRMS (ESI)** *m/z*: [M+H]<sup>+</sup> calculated for C<sub>13</sub>H<sub>12</sub>NNaO<sub>4</sub><sup>+</sup> 214.0862, found 214.0805;

**IR** (film) *v*<sub>max</sub> = 3111, 3049, 2925, 2851, 2361, 1605, 1514, 1334, 1272, 956, 815,

742, 708.

**7ac** is a known compound.<sup>[S2]</sup>

**5-(1-nitroprop-1-en-2-yl)benzo[d][1,3]dioxole (7ad)**

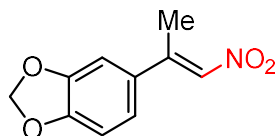

Yield of **7ad** 78%, 50 mg; yellow solid; **mp** 114-115 °C;  $R_f$  = 0.6 (silica, PE:EtOAc = 20:1);

**<sup>1</sup>H NMR** (400 MHz, CDCl<sub>3</sub>):  $\delta$  7.29 (d,  $J$  = 1.4 Hz, 1H), 7.00 (dd,  $J$  = 8.2, 2.0 Hz, 1H), 6.93 (d,  $J$  = 1.9 Hz, 1H), 6.85 (d,  $J$  = 8.1 Hz, 1H), 6.03 (s, 2H), 2.61 (d,  $J$  = 1.4 Hz, 3H) ppm;

**<sup>13</sup>C NMR** (100 MHz, CDCl<sub>3</sub>):  $\delta$  149.7, 148.4, 135.5, 132.1, 121.5, 108.7, 107.0, 101.8, 29.7, 18.6 ppm;

**IR** (film)  $\nu_{\text{max}}$  = 3359, 3184, 2964, 2925, 2851, 1729, 1644, 1469, 1374, 1244, 1040, 820.

**7ac** is a known compound.<sup>[S16]</sup>

**1,2-dimethoxy-4-(2-nitroprop-1-en-1-yl)benzene (7ae)**

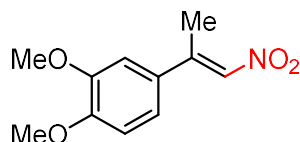

Yield of **7ae** 50%, 33 mg; yellow liquid;  $R_f$  = 0.6 (silica, PE:EtOAc = 10:1);

**<sup>1</sup>H NMR** (400 MHz, CDCl<sub>3</sub>):  $\delta$  8.07 (s, 1H), 7.09 (dd,  $J$  = 8.3, 2.1 Hz, 1H), 6.97 – 6.95 (m, 1H), 6.82 (s, 1H), 3.96 – 3.83 (m, 9H), 2.49 (d,  $J$  = 1.0 Hz, 3H) ppm;

**<sup>13</sup>C NMR** (100 MHz, CDCl<sub>3</sub>):  $\delta$  134.0, 125.1, 124.1, 122.1, 113.2, 111.4, 111.1, 56.2, 56.1, 56.0, 14.3 ppm;

**HRMS (ESI)**  $m/z$ :  $[M+Na]^+$  calculated for C<sub>11</sub>H<sub>13</sub>NNaO<sub>4</sub><sup>+</sup> 246.0736, found 246.0729;

**IR** (film)  $\nu_{\text{max}}$  = 2964, 2925, 2837, 1734, 1599, 1520, 1464, 1379, 1278, 1154, 1030.

**7ae** is a known compound.<sup>[S5]</sup>

**(E)-2-chloro-3,4-dimethoxy-1-(2-nitrovinyl)benzene (7af)**

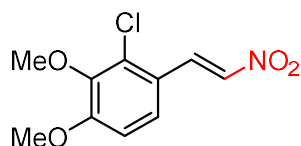

Yield of **7af** 81%, 50 mg; yellow liquid;  $R_f = 0.6$  (silica, PE:EtOAc = 10:1);

$^1\text{H NMR}$  (400 MHz,  $\text{CDCl}_3$ ):  $\delta$  8.35 (d,  $J = 13.6$  Hz, 1H), 7.56 (d,  $J = 13.6$  Hz, 1H), 7.36 (d,  $J = 8.8$  Hz, 1H), 6.89 (d,  $J = 8.8$  Hz, 1H), 3.94 (s, 3H), 3.88 (s, 3H) ppm;

$^{13}\text{C NMR}$  (100 MHz,  $\text{CDCl}_3$ ):  $\delta$  156.8, 146.5, 137.2, 135.6, 131.1, 124.6, 121.8, 111.0, 60.8, 56.4 ppm;

**HRMS (ESI)**  $m/z$ :  $[\text{M}+\text{H}]^+$  calculated for  $\text{C}_{10}\text{H}_{10}\text{NO}_3^+$  244.0371, found 244.0332;

**IR** (film)  $\nu_{\text{max}} = 3111, 2925, 2851, 1723, 1635, 1588, 1498, 1402, 1351, 1272, 1046, 968, 810, 657$ .

**7af** is a known compound.<sup>[S1]</sup>

**(E)-4-methoxy-2-methyl-1-(2-nitrovinyl)benzene (7ag)**

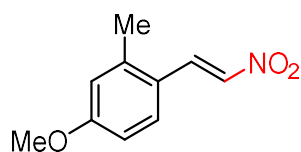

Yield of **7ag** 40%, 26 mg; yellow solid; **mp** 221-223 °C;  $R_f = 0.6$  (silica, PE:EtOAc = 20:1);

$^1\text{H NMR}$  (400 MHz,  $\text{CDCl}_3$ ):  $\delta$  8.25 (d,  $J = 13.5$  Hz, 1H), 7.53 – 7.44 (m, 2H), 6.78 (dd,  $J = 4.6, 2.1$  Hz, 2H), 3.84 (s, 3H), 2.46 (s, 3H) ppm;

$^{13}\text{C NMR}$  (100 MHz,  $\text{CDCl}_3$ ):  $\delta$  162.8, 141.9, 136.7, 135.5, 129.5, 121.5, 116.6, 112.9, 55.5, 20.4 ppm;

**HRMS (ESI)**  $m/z$ :  $[\text{M}+\text{H}]^+$  calculated for  $\text{C}_{10}\text{H}_{12}\text{NO}_3^+$  194.0811, found 194.0809.

**7ag** is a known compound.<sup>[S10]</sup>



## 5. Copies of NMR spectrum

### <sup>1</sup>H NMR of 6j (400 MHz, CDCl<sub>3</sub>)

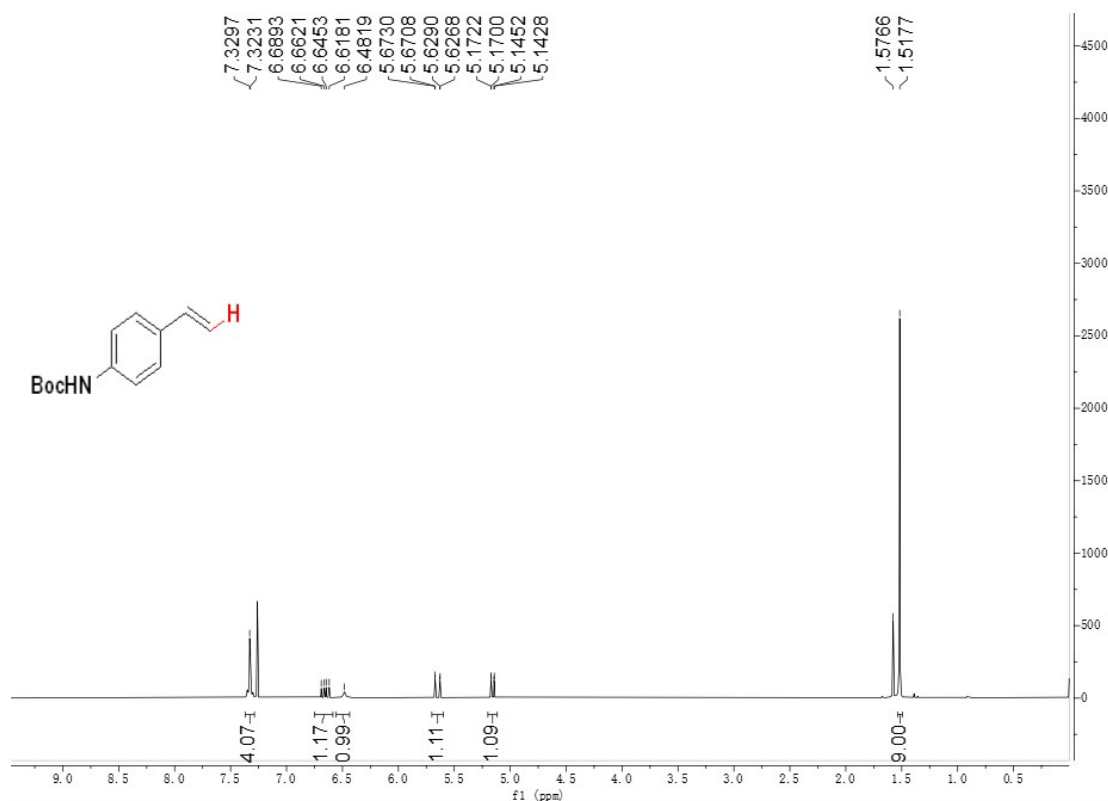

### <sup>13</sup>C NMR of 6j (100 MHz, CDCl<sub>3</sub>)

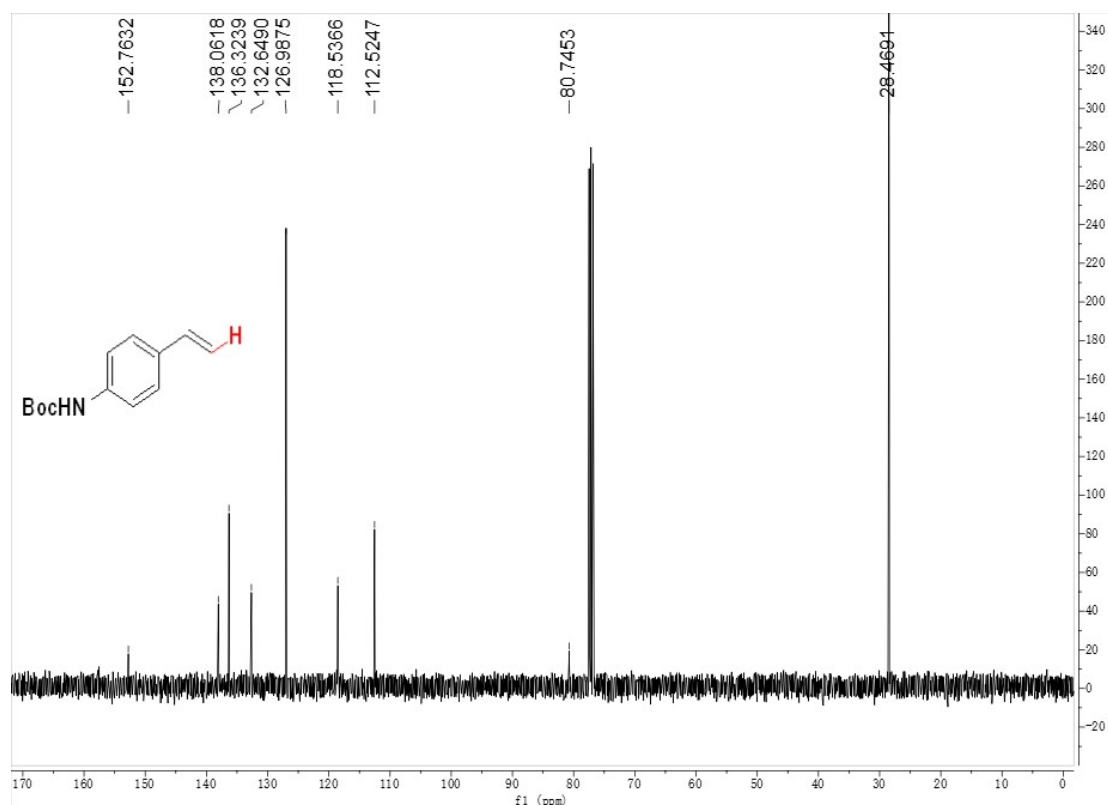

### <sup>1</sup>H NMR of 6v (400 MHz, CDCl<sub>3</sub>)

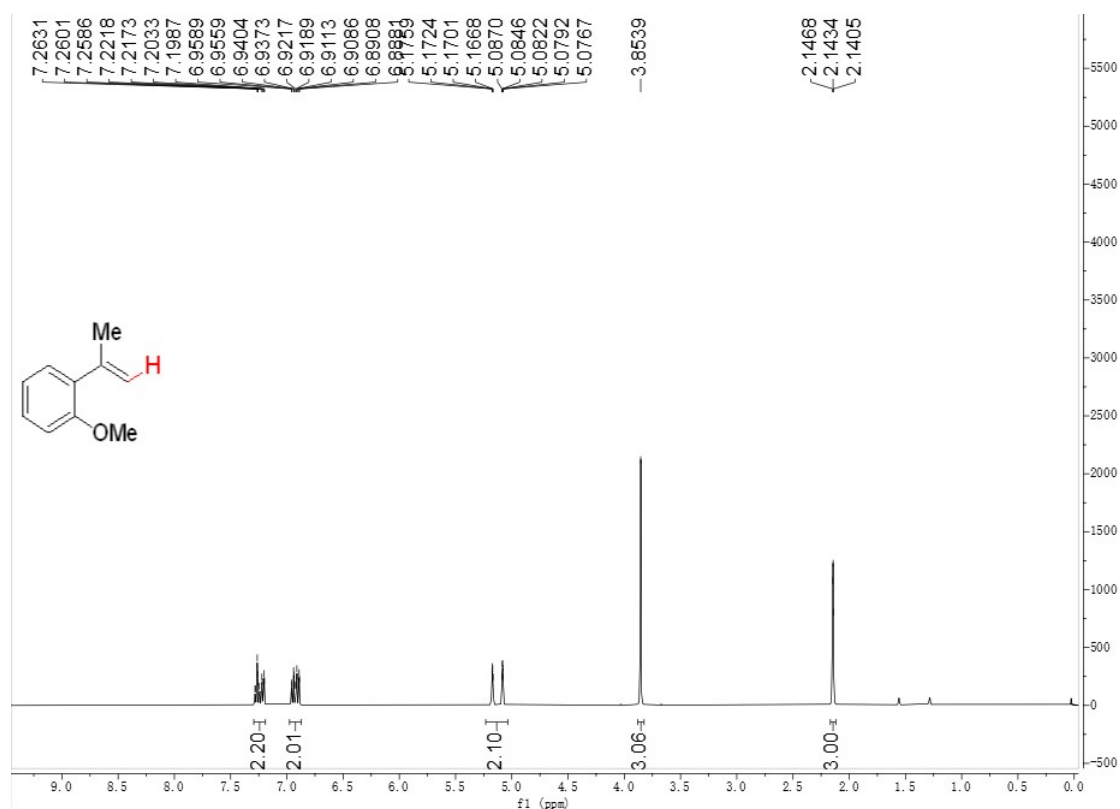

### <sup>13</sup>C NMR of 6v (100 MHz, CDCl<sub>3</sub>)

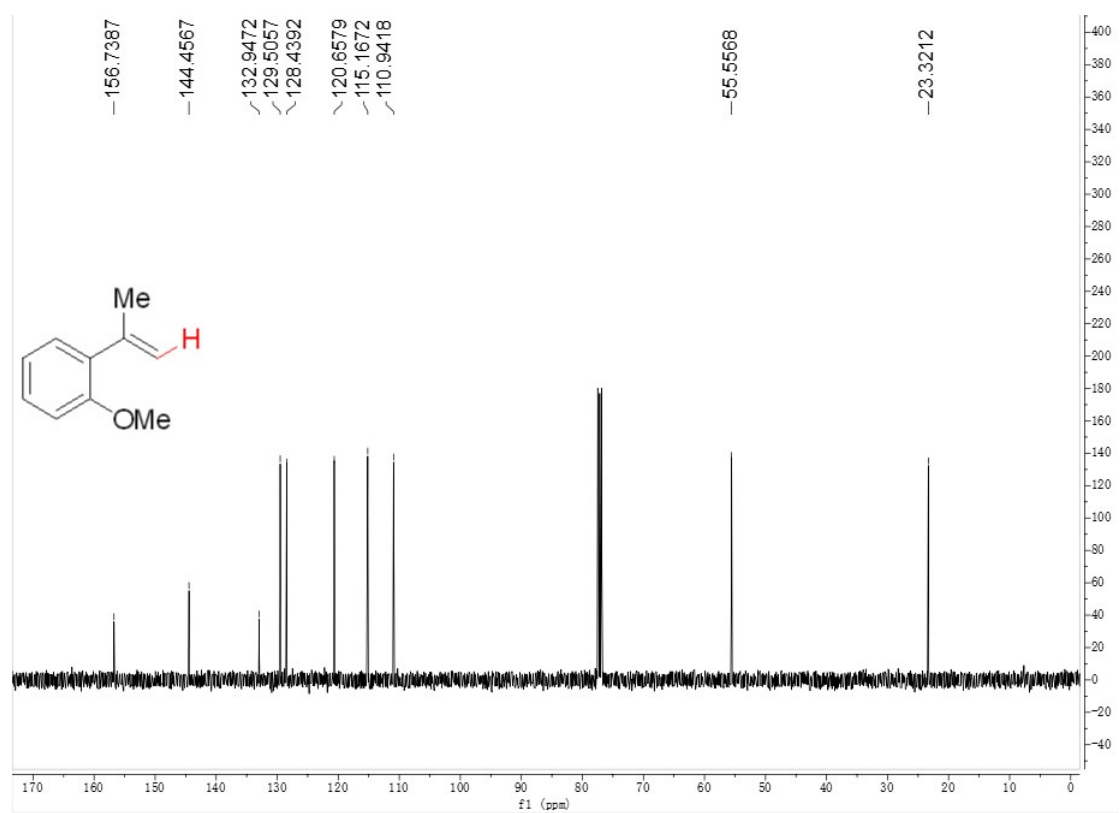

### <sup>1</sup>H NMR of 6x (400 MHz, CDCl<sub>3</sub>)

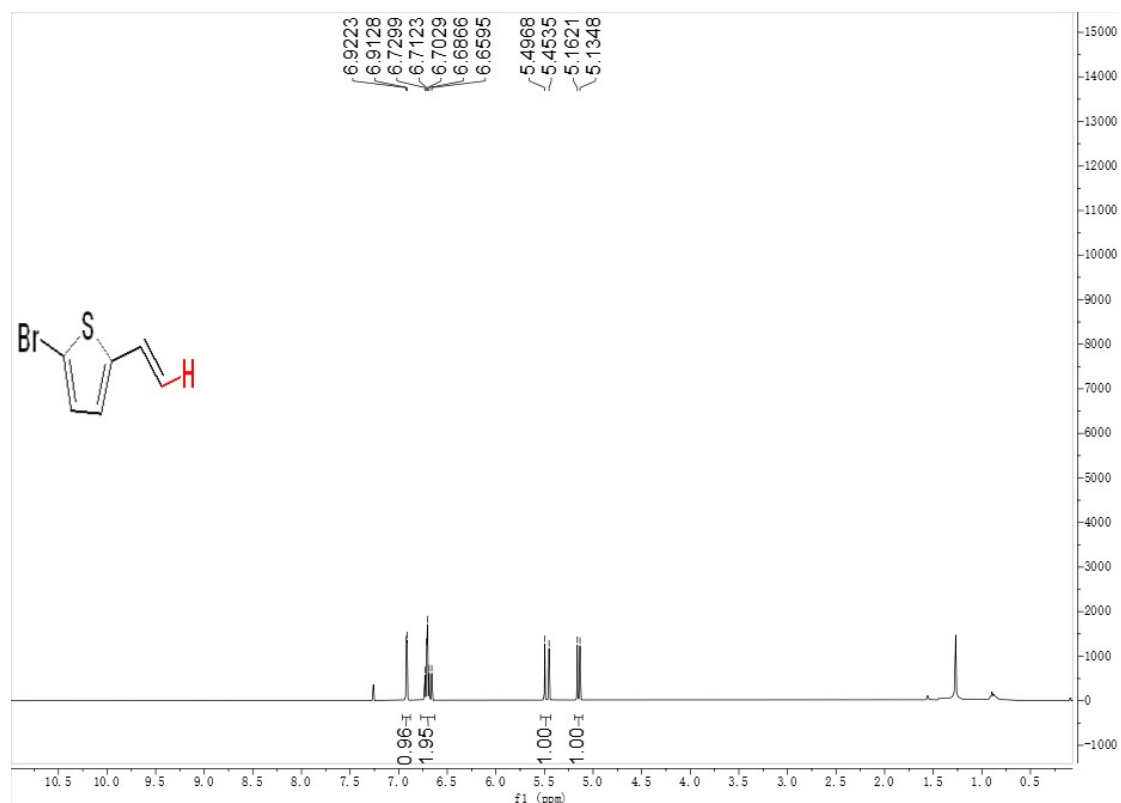

### <sup>13</sup>C NMR of 6x (100 MHz, CDCl<sub>3</sub>)

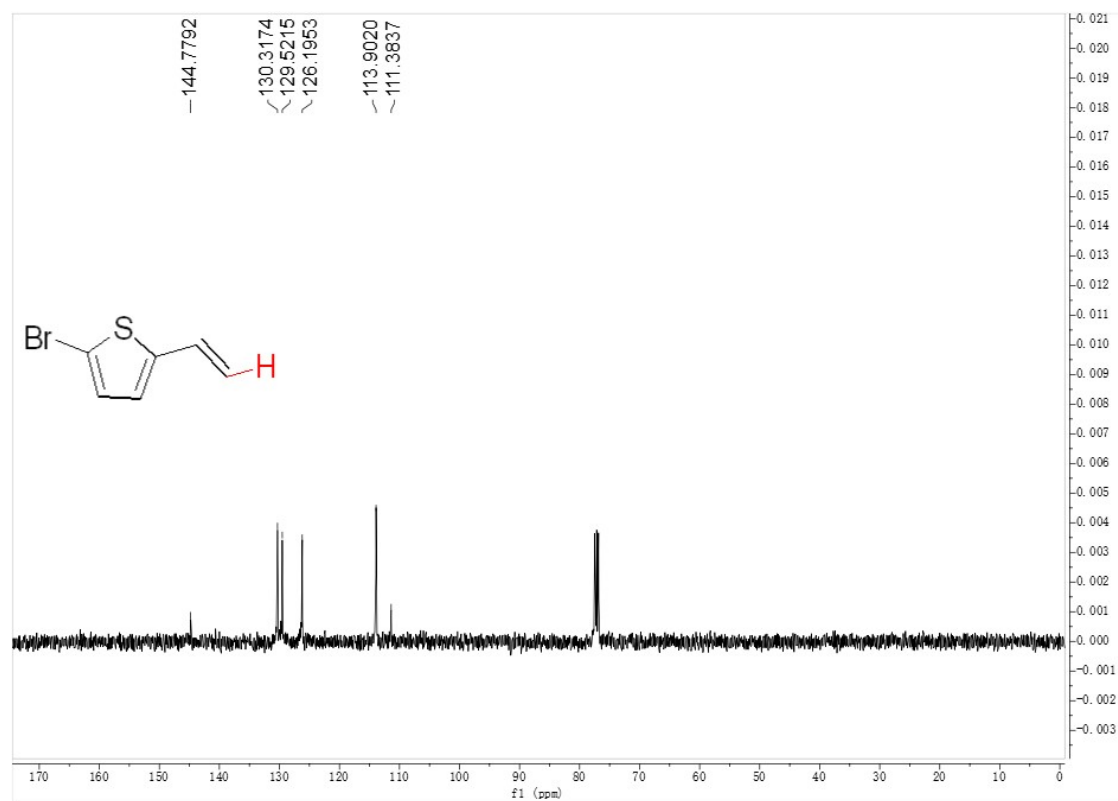

### <sup>1</sup>H NMR of 6z (400 MHz, CDCl<sub>3</sub>)

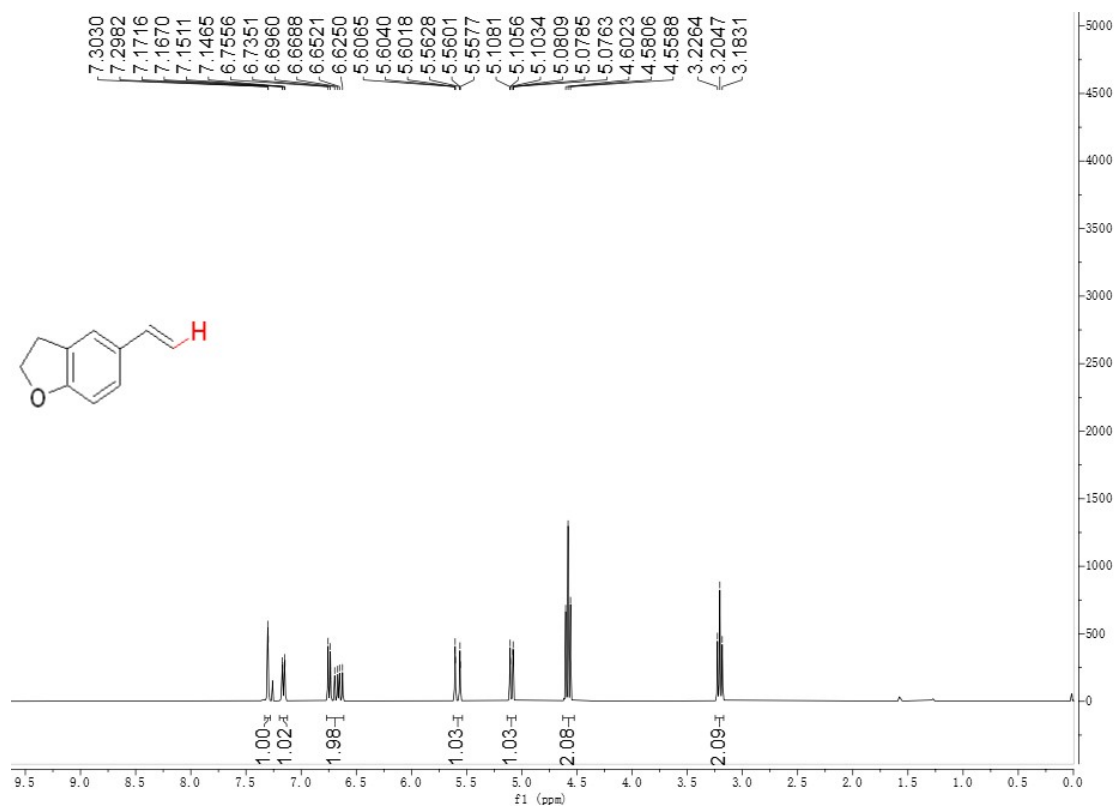

### <sup>13</sup>C NMR of 6z (100 MHz, CDCl<sub>3</sub>)

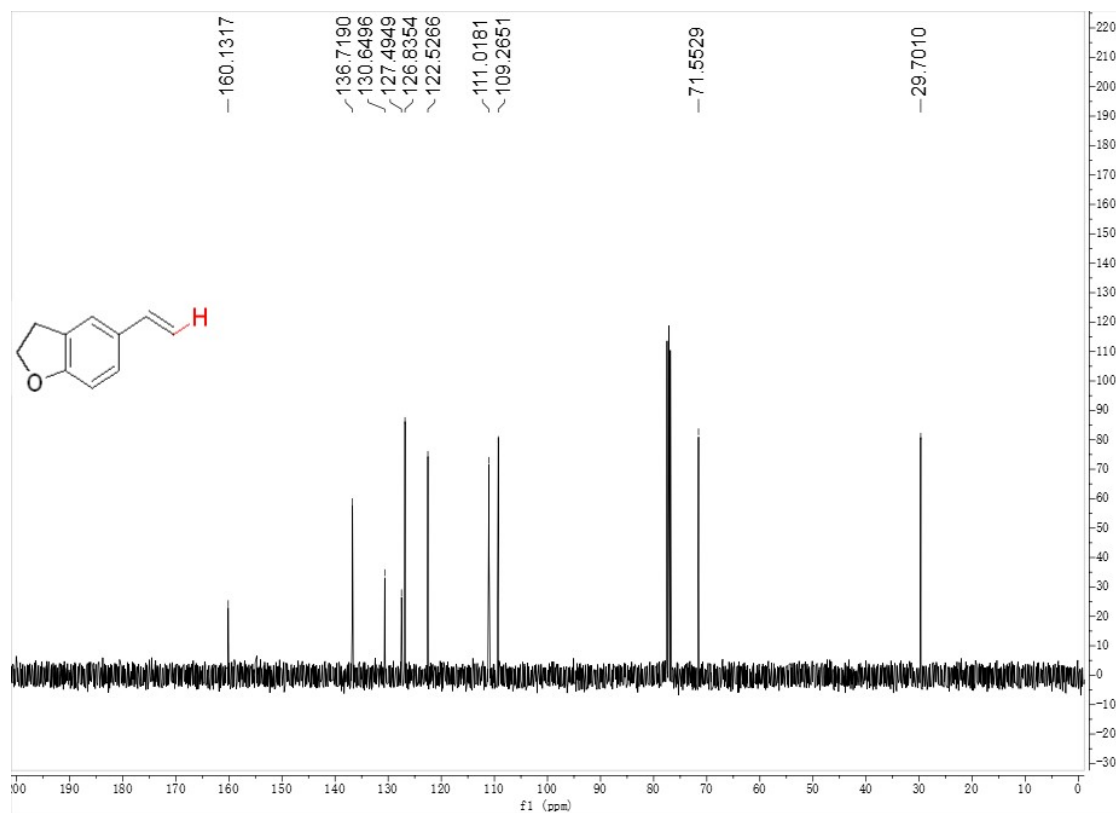

### <sup>1</sup>H NMR of 6ad (400 MHz, CDCl<sub>3</sub>)

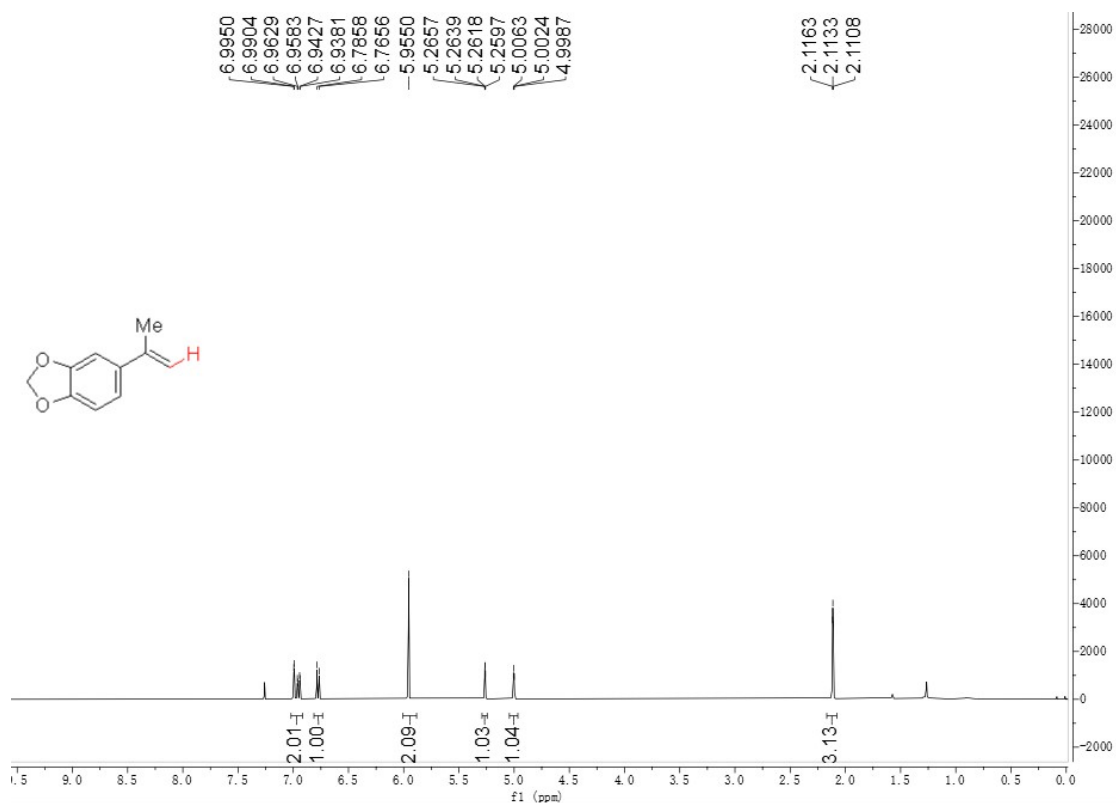

### <sup>13</sup>C NMR of 6ad (100 MHz, CDCl<sub>3</sub>)

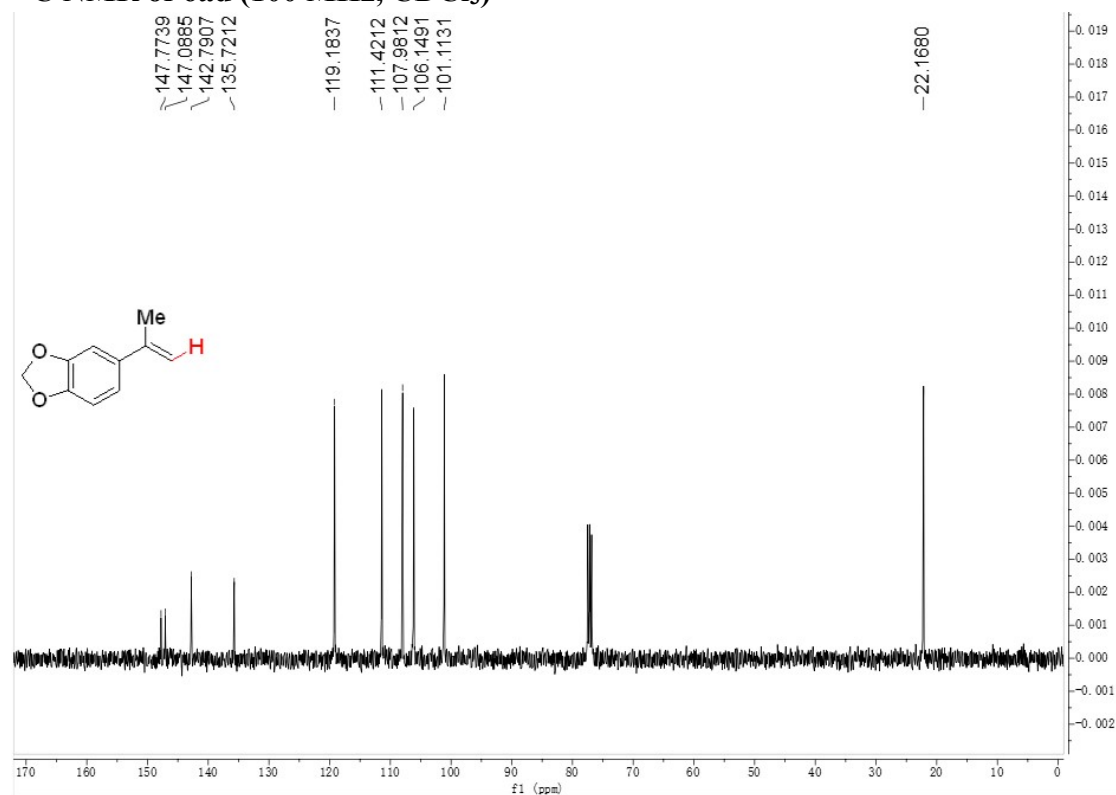

### <sup>1</sup>H NMR of 6af (400 MHz, CDCl<sub>3</sub>)

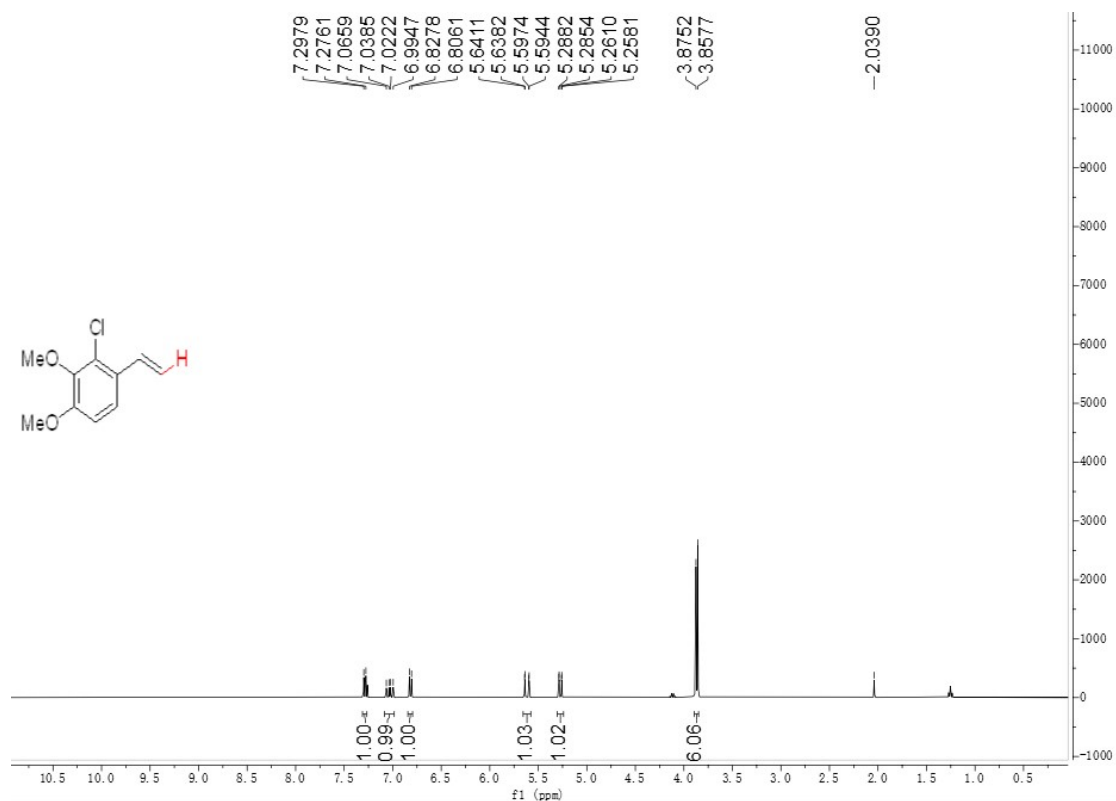

### <sup>13</sup>C NMR of 6af (100 MHz, CDCl<sub>3</sub>)

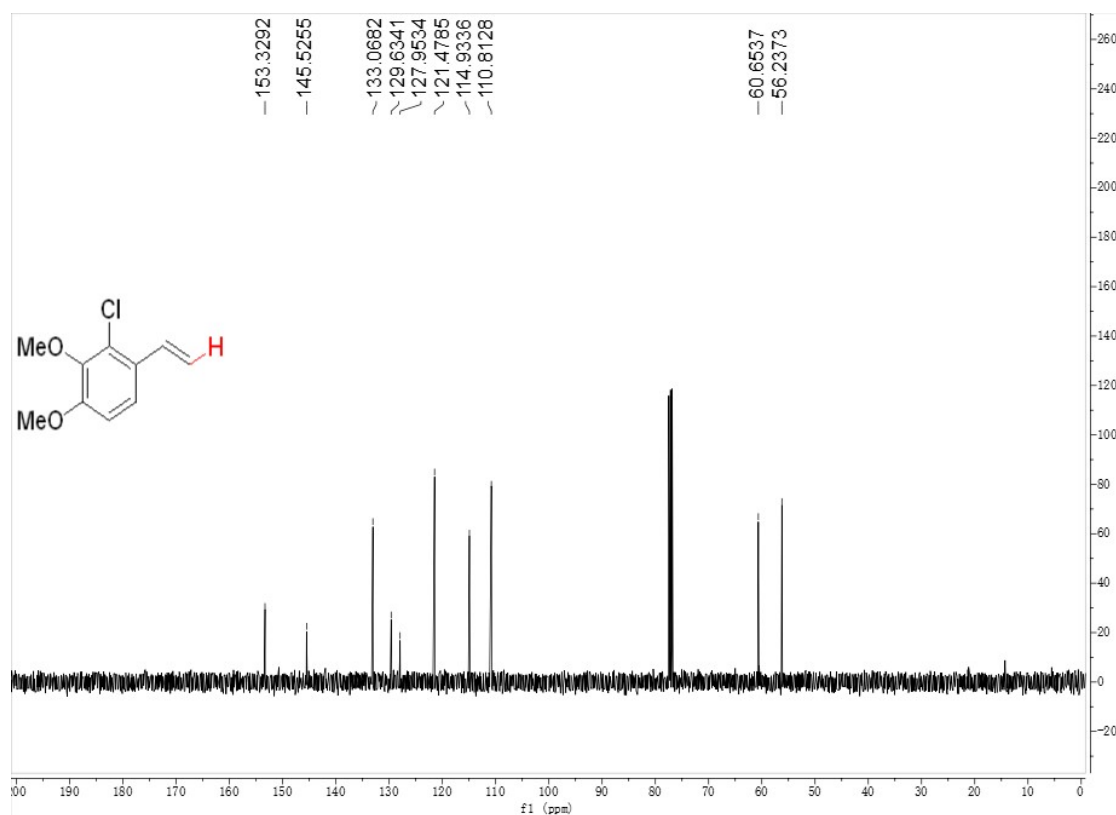

### <sup>1</sup>H NMR of 6ag (400 MHz, CDCl<sub>3</sub>)

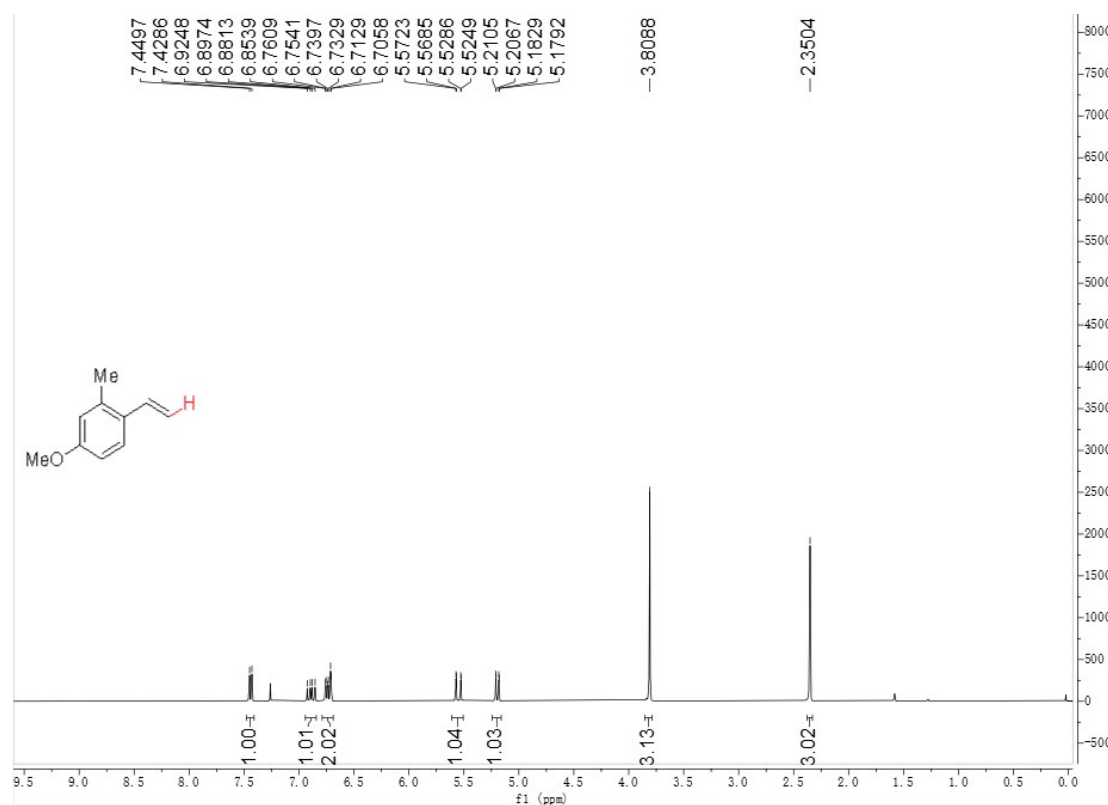

### <sup>13</sup>C NMR of 6ag (100 MHz, CDCl<sub>3</sub>)

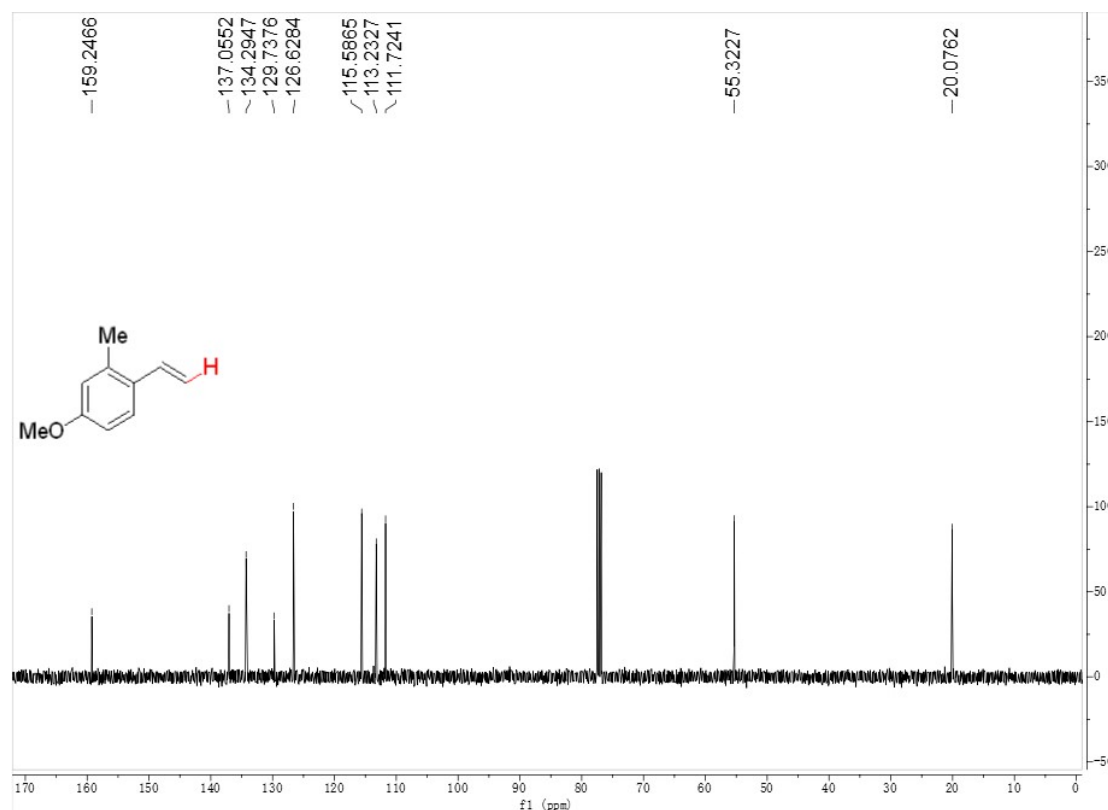

### <sup>1</sup>H NMR of 7a (400 MHz, CDCl<sub>3</sub>)

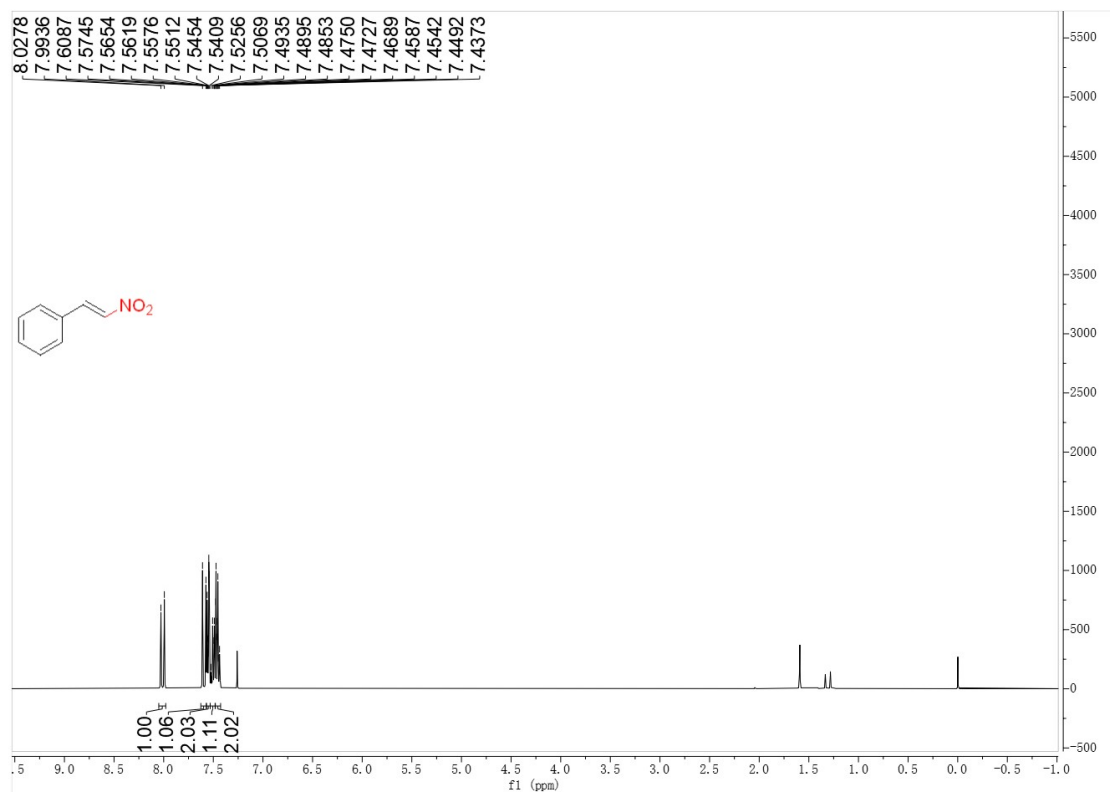

### <sup>13</sup>C NMR of 7a (100 MHz, CDCl<sub>3</sub>)

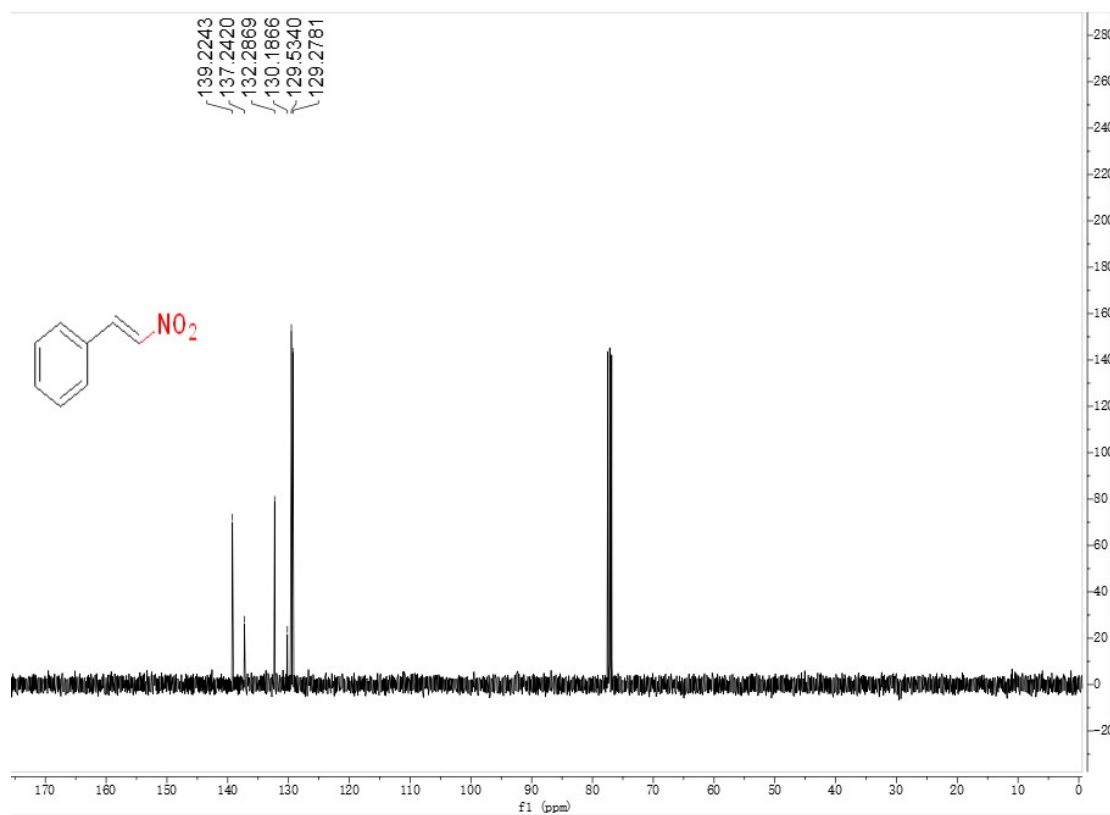



### <sup>1</sup>H NMR of 7b (400 MHz, CDCl<sub>3</sub>)

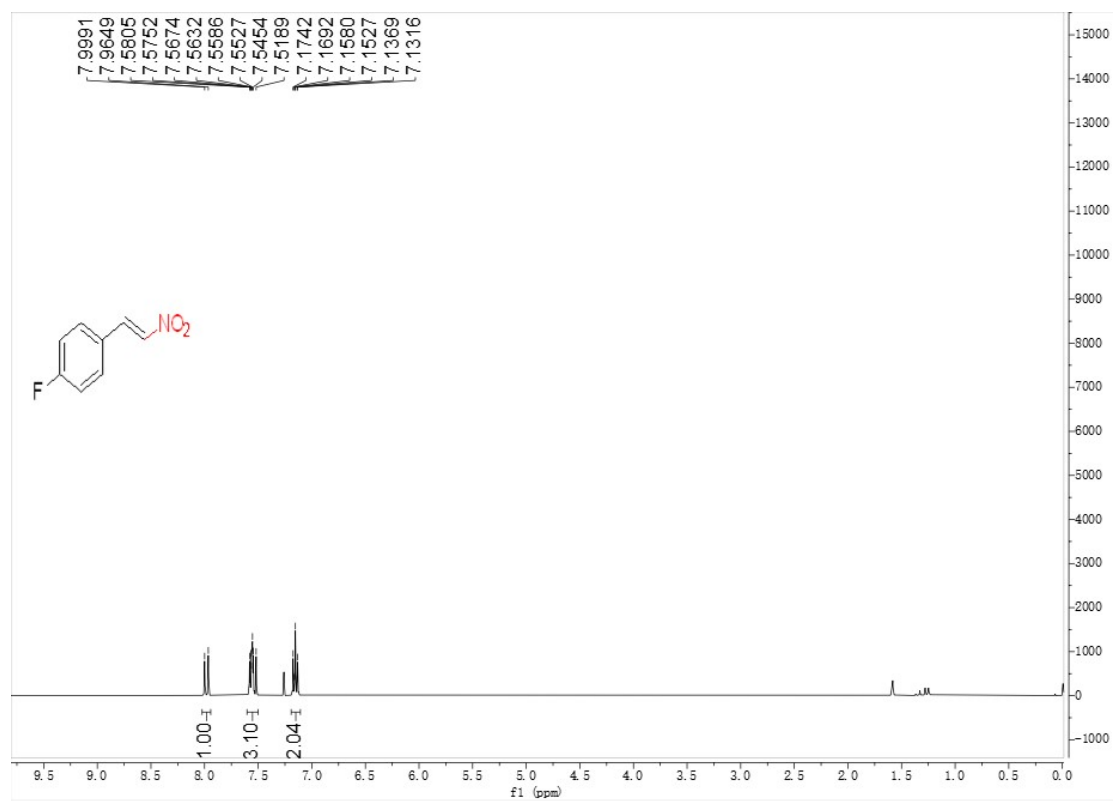

### <sup>13</sup>C NMR of 7b(100 MHz, CDCl<sub>3</sub>)

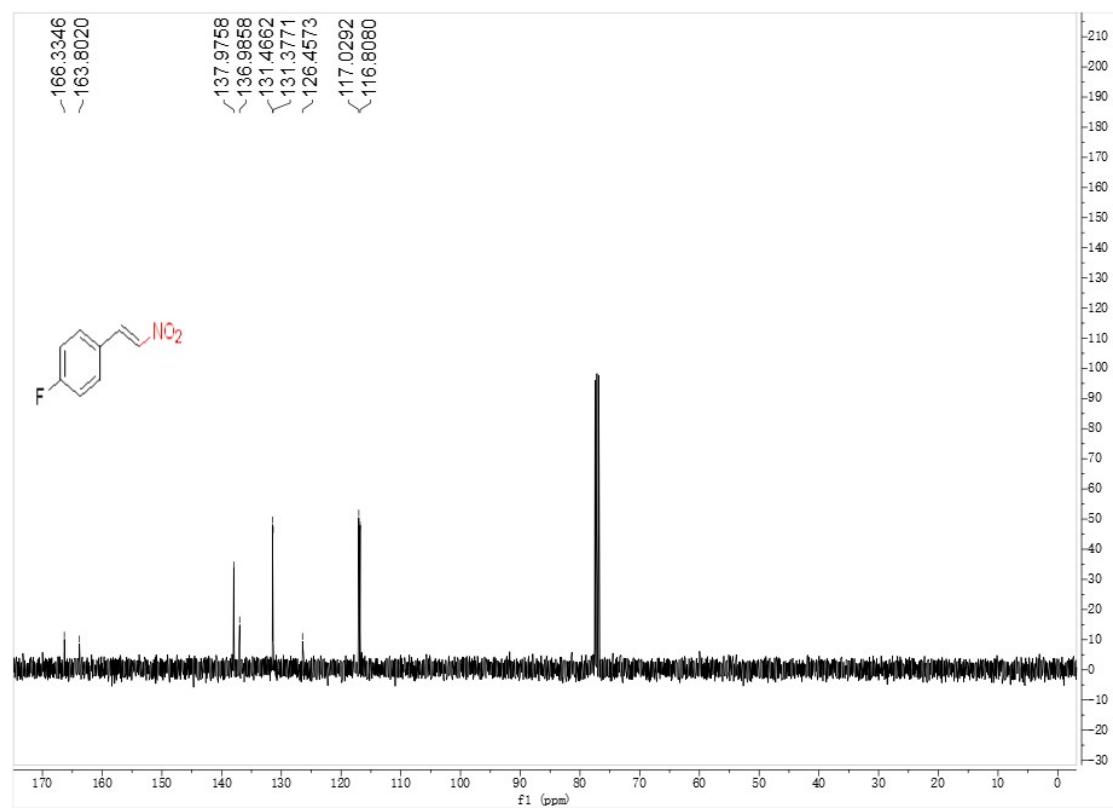

### <sup>1</sup>H NMR of 7c (400 MHz, CDCl<sub>3</sub>)

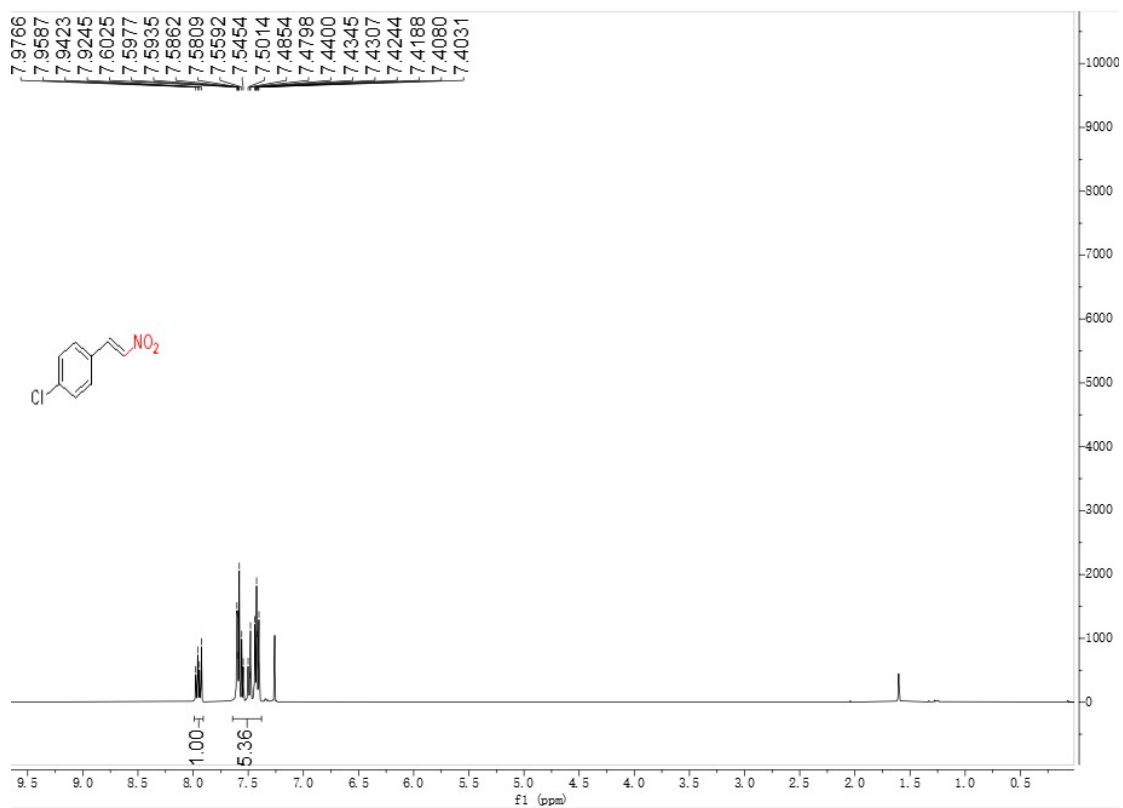

### <sup>13</sup>C NMR of 7c (100 MHz, CDCl<sub>3</sub>)

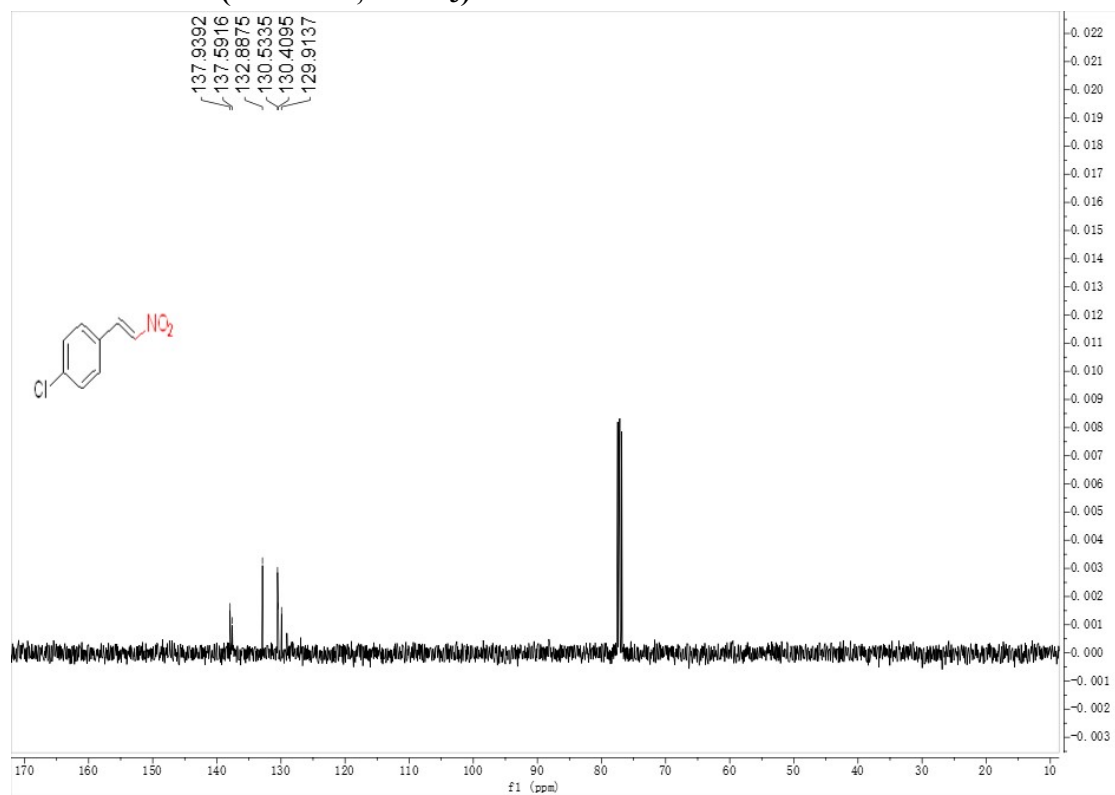

### <sup>1</sup>H NMR of 7d (400 MHz, CDCl<sub>3</sub>)

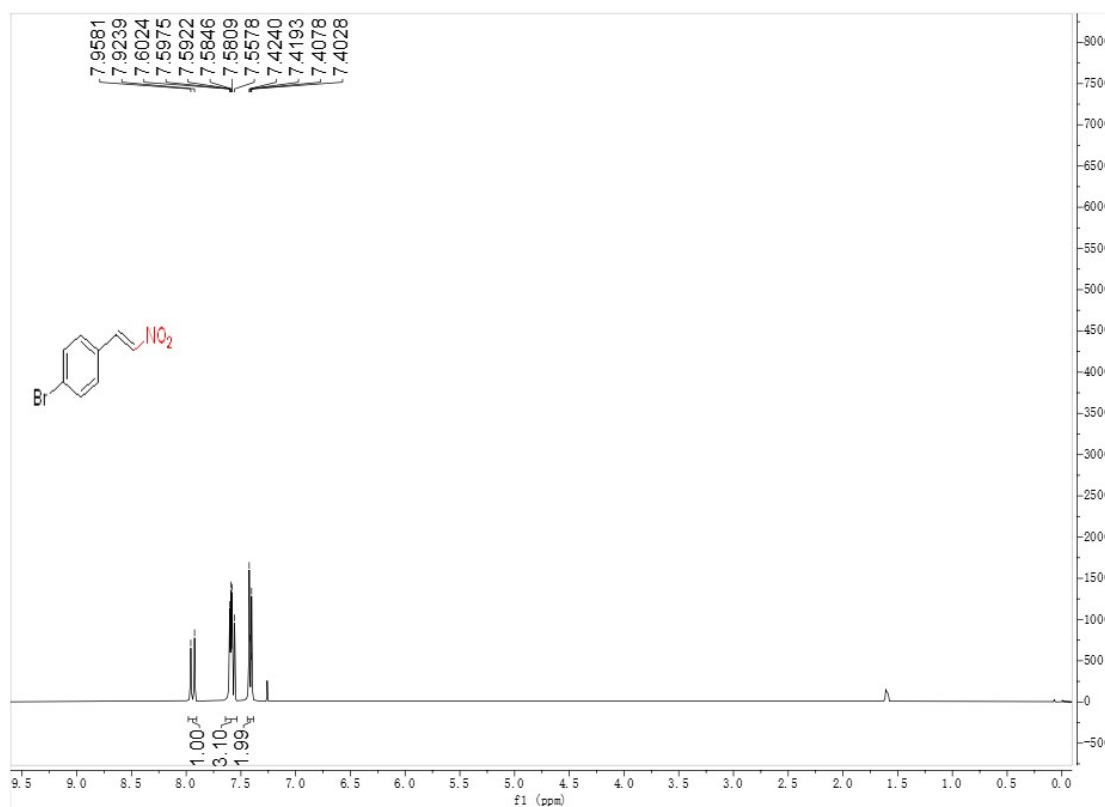

### <sup>13</sup>C NMR of 7d (100 MHz, CDCl<sub>3</sub>)

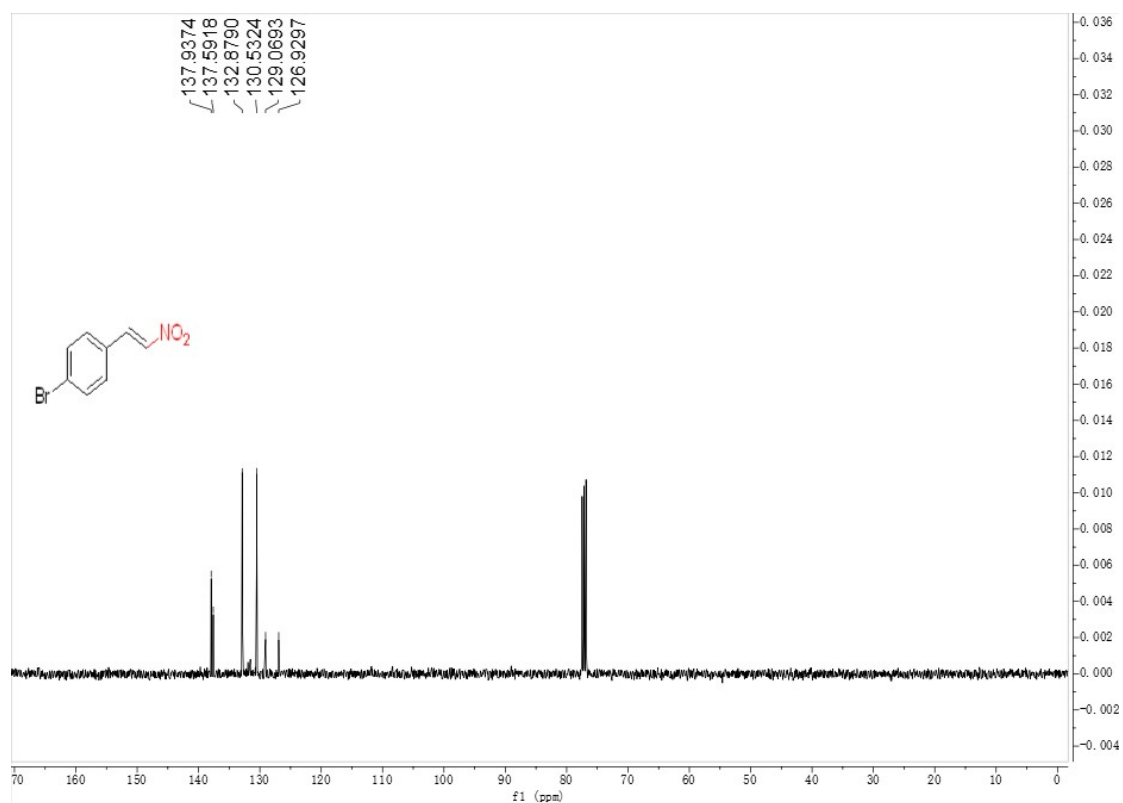

### <sup>1</sup>H NMR of 7e (400 MHz, CDCl<sub>3</sub>)

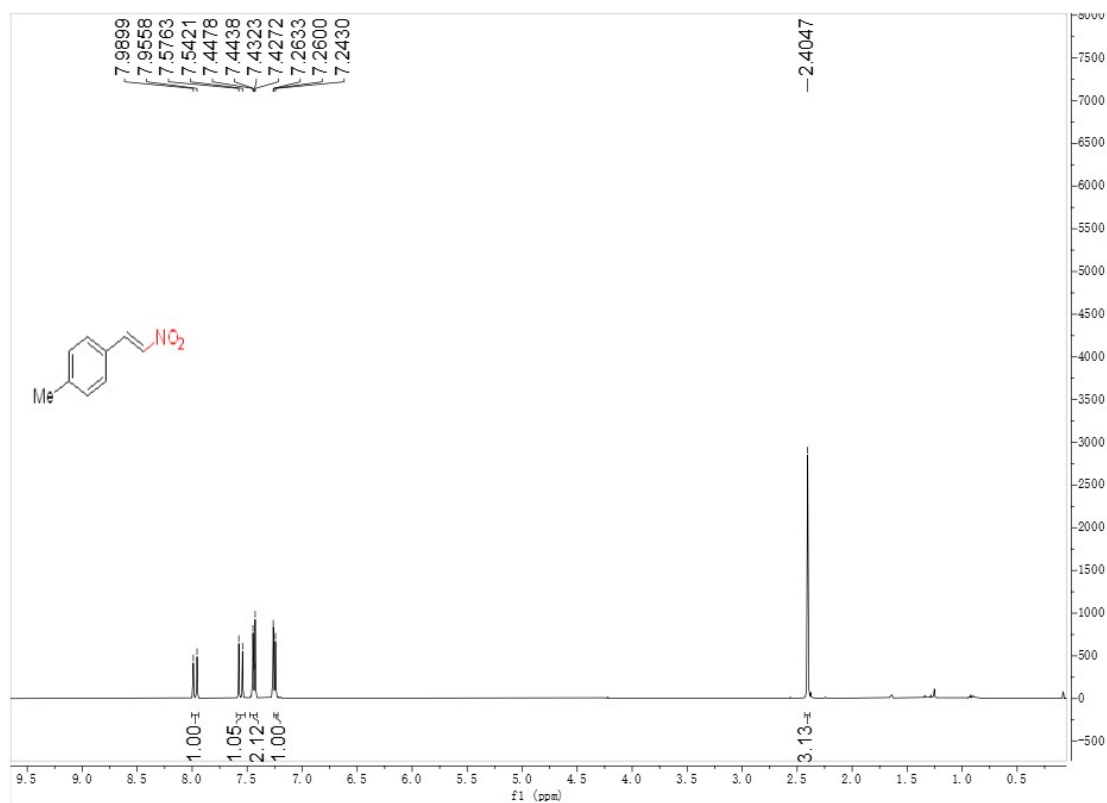

### <sup>13</sup>C NMR of 7e (100 MHz, CDCl<sub>3</sub>)

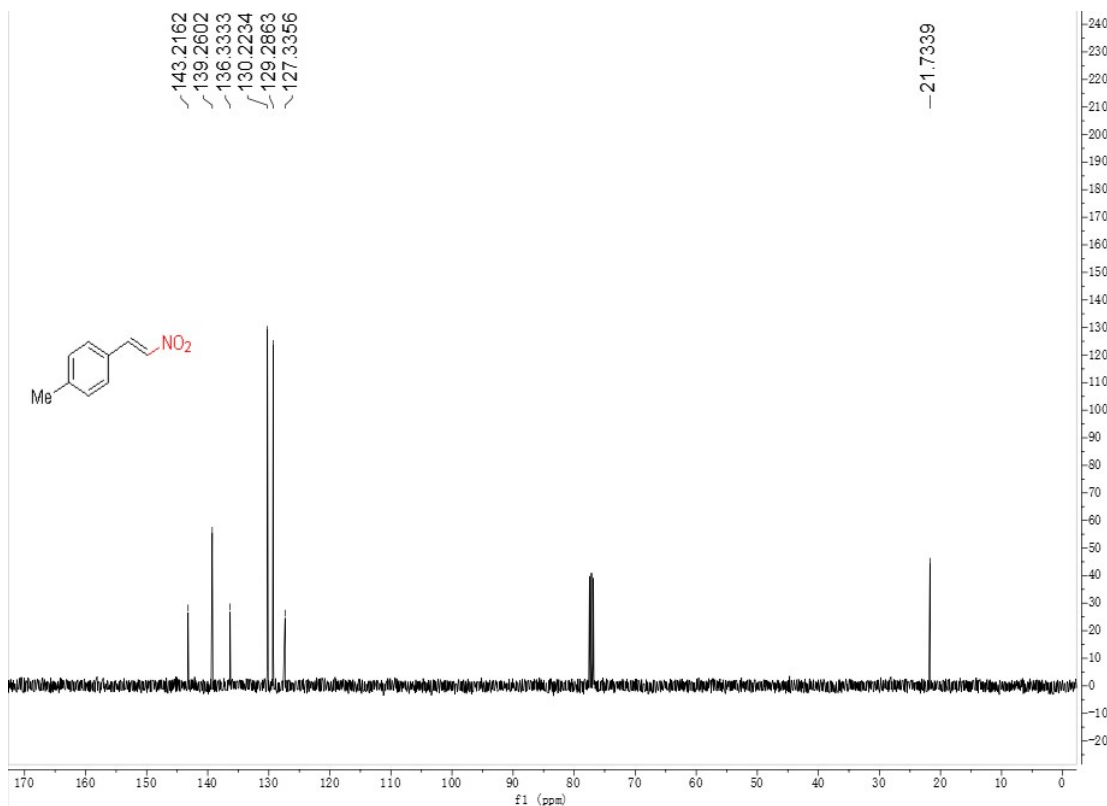

### $^1\text{H}$ NMR of 7f (400 MHz, $\text{CDCl}_3$ )

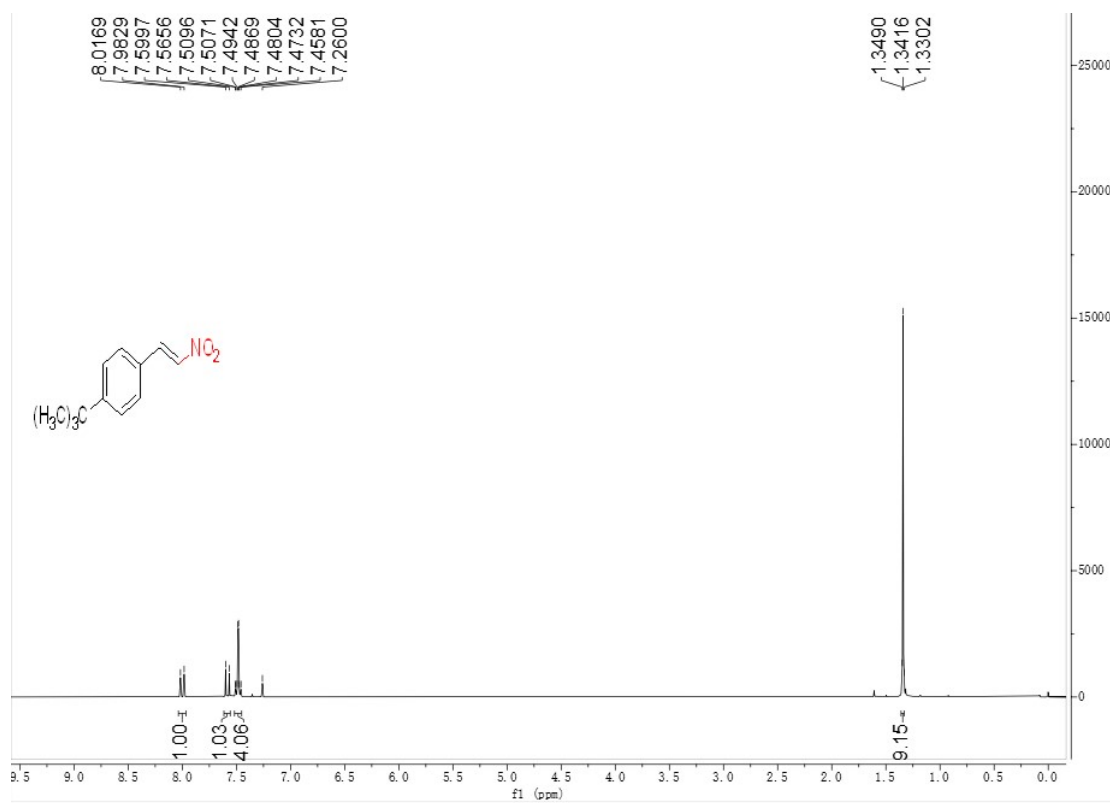

### $^{13}\text{C}$ NMR of 7f (100 MHz, $\text{CDCl}_3$ )

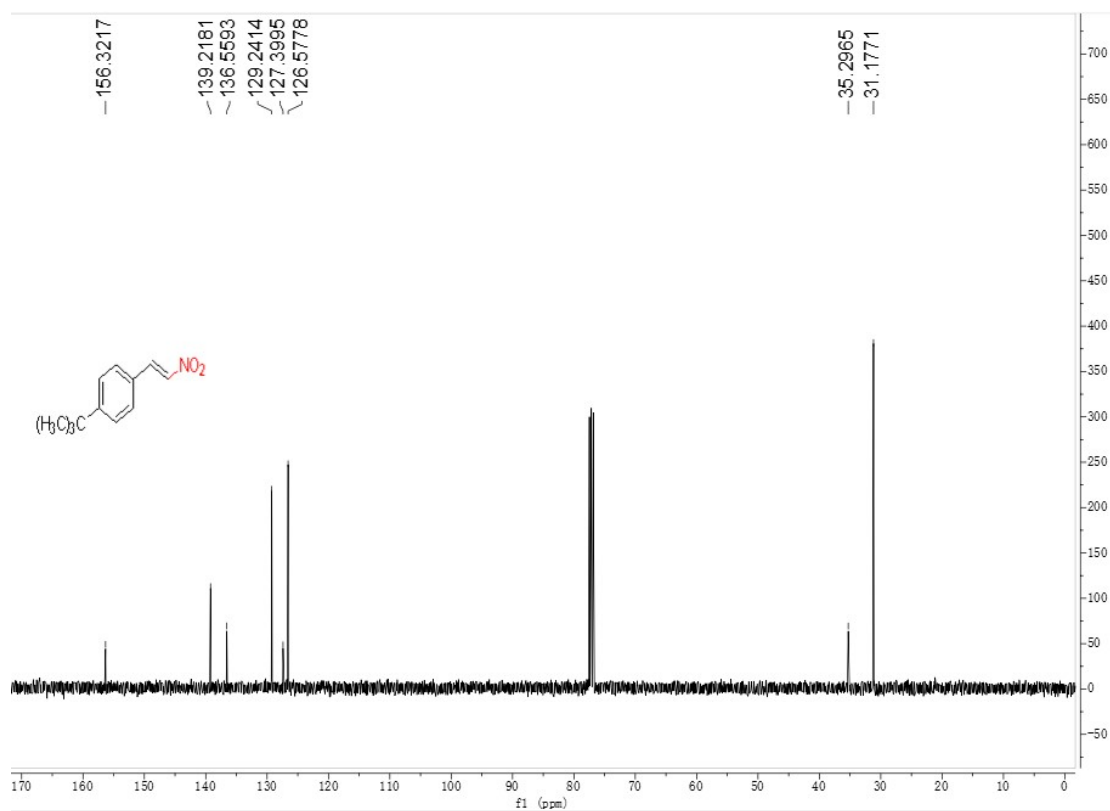

### <sup>1</sup>H NMR of 7g (400 MHz, CDCl<sub>3</sub>)

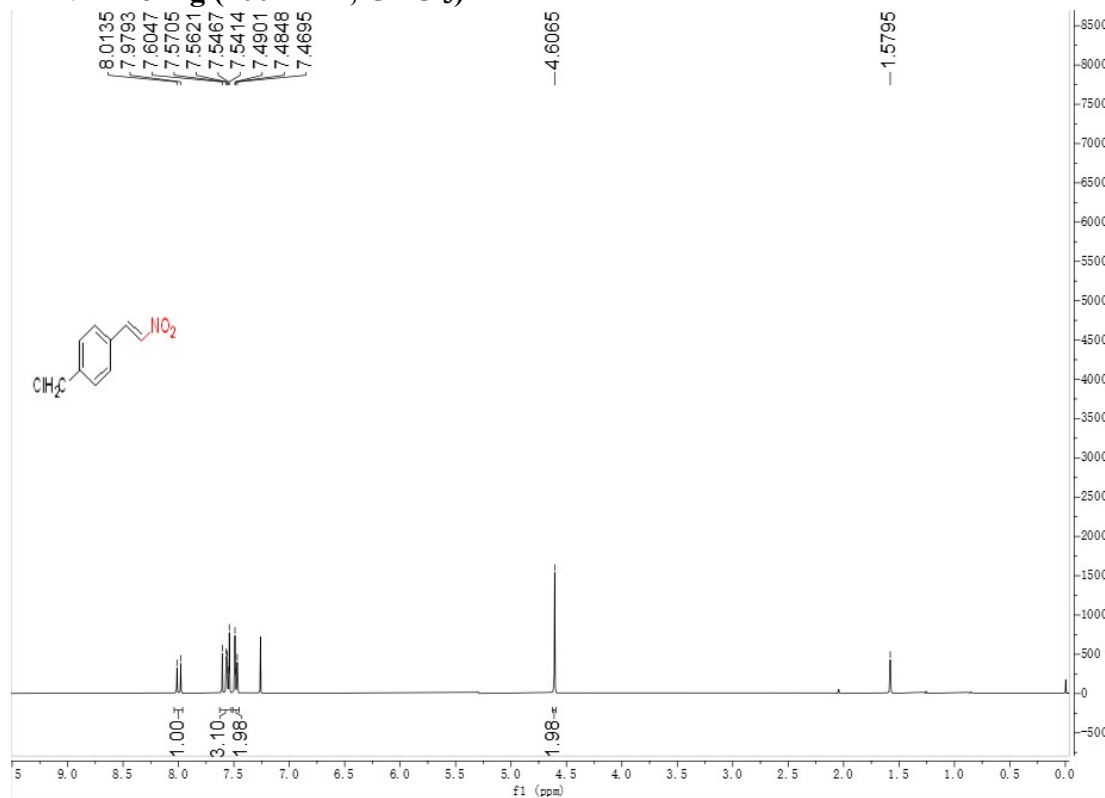

### <sup>13</sup>C NMR of 7g (100 MHz, CDCl<sub>3</sub>)

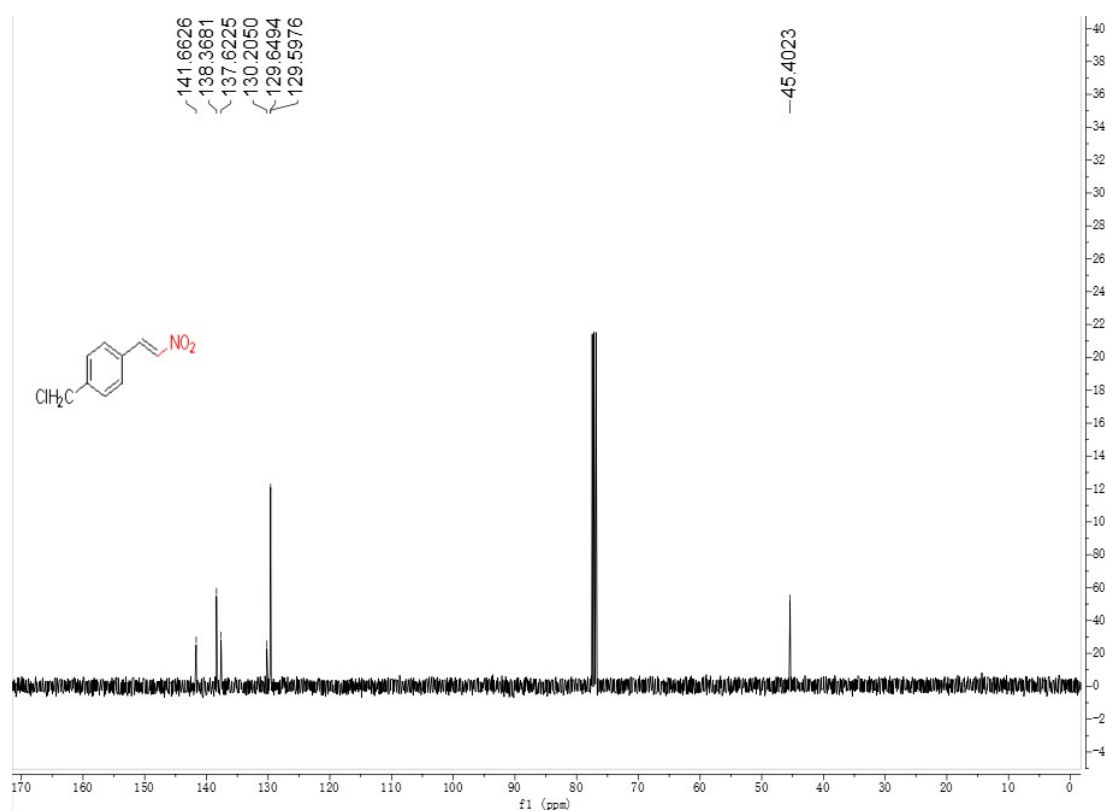

### <sup>1</sup>H NMR of 7h (400 MHz, CDCl<sub>3</sub>)

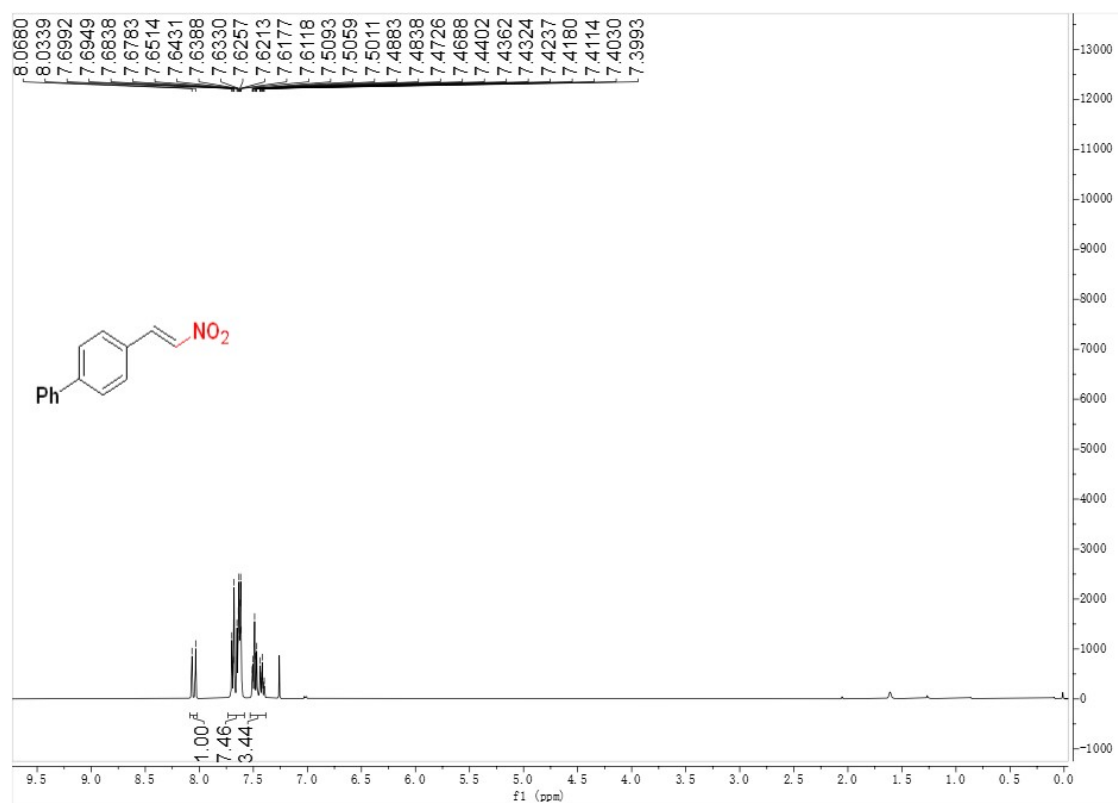

### <sup>13</sup>C NMR of 7h (100 MHz, CDCl<sub>3</sub>)

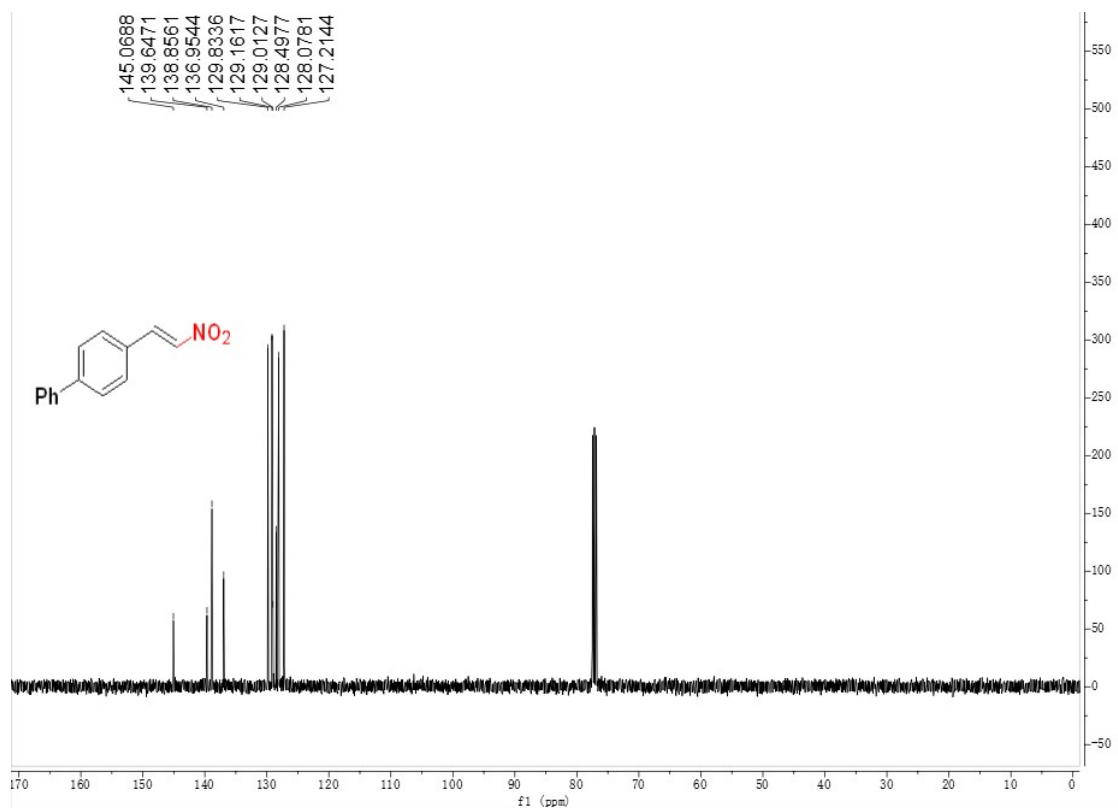

### <sup>1</sup>H NMR of 7i (400 MHz, CDCl<sub>3</sub>)

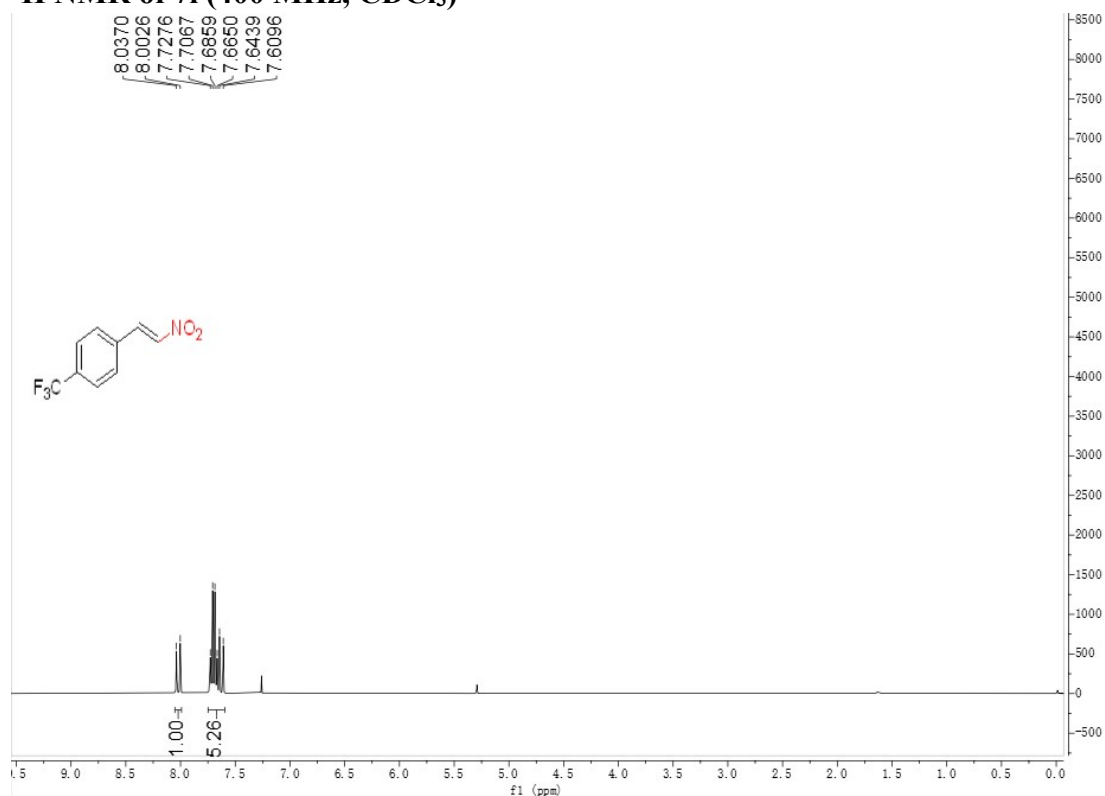

### <sup>13</sup>C NMR of 7i (100 MHz, CDCl<sub>3</sub>)

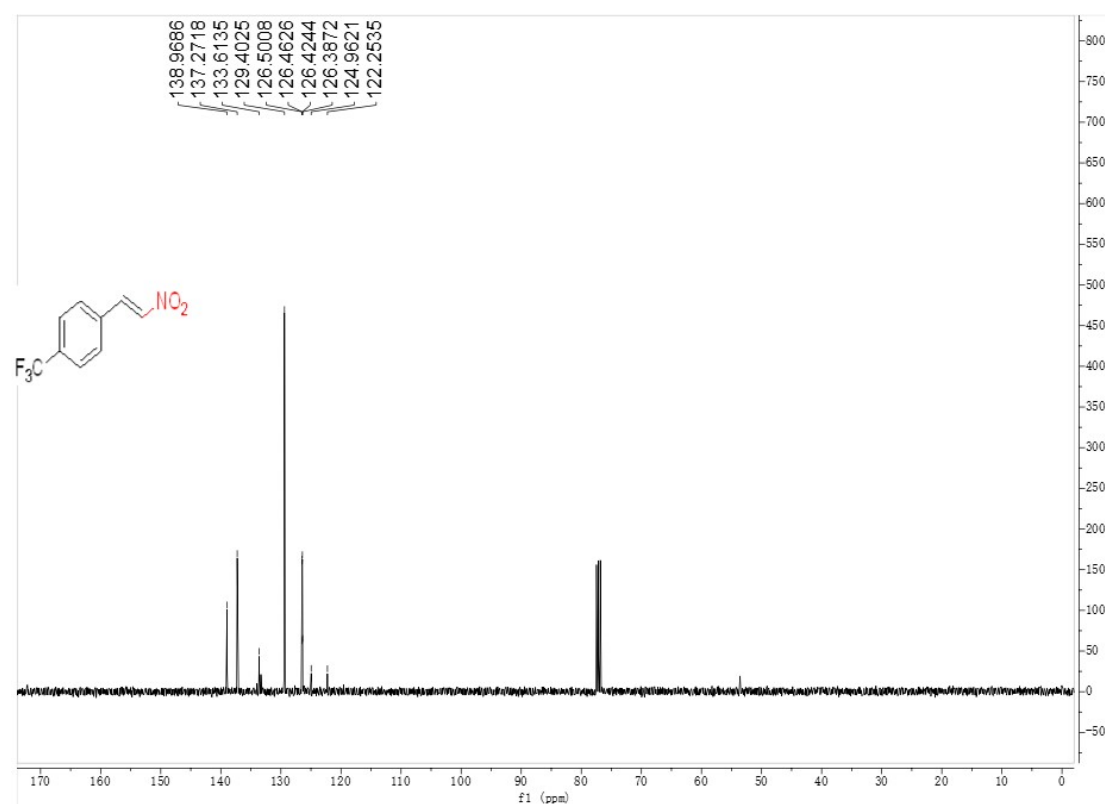



### <sup>1</sup>H NMR of 7j (400 MHz, CDCl<sub>3</sub>)

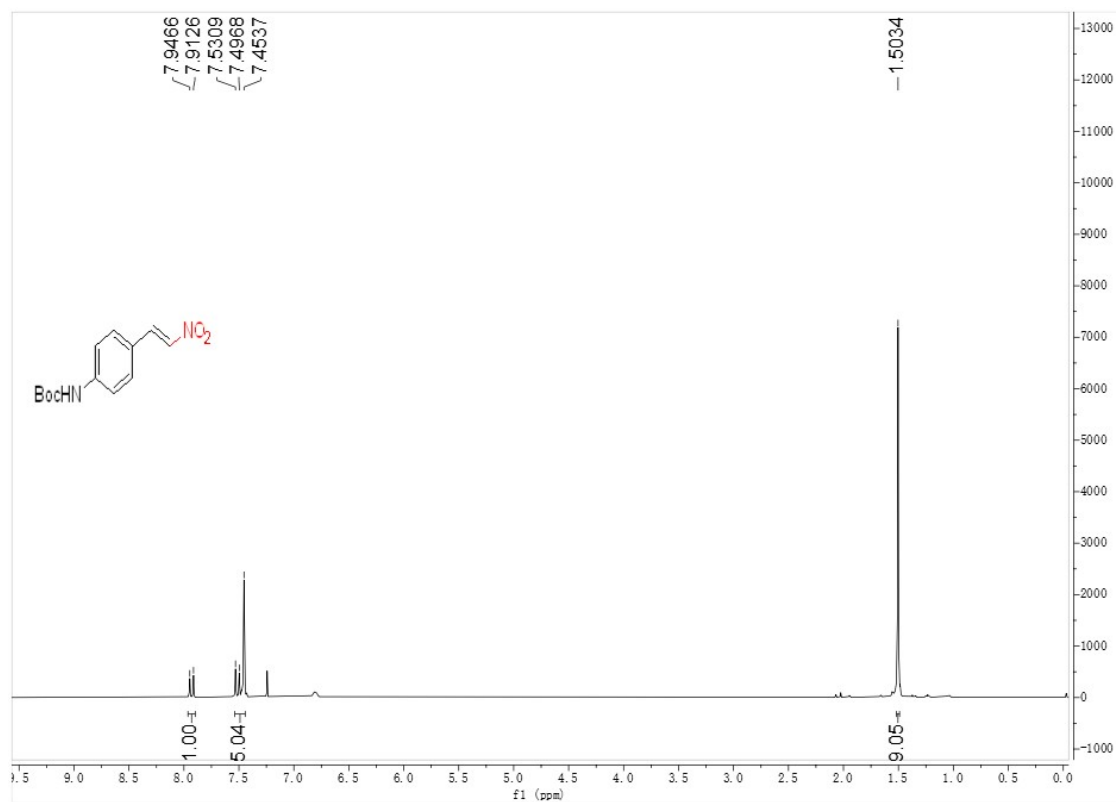

### <sup>13</sup>C NMR of 7j (100 MHz, CDCl<sub>3</sub>)

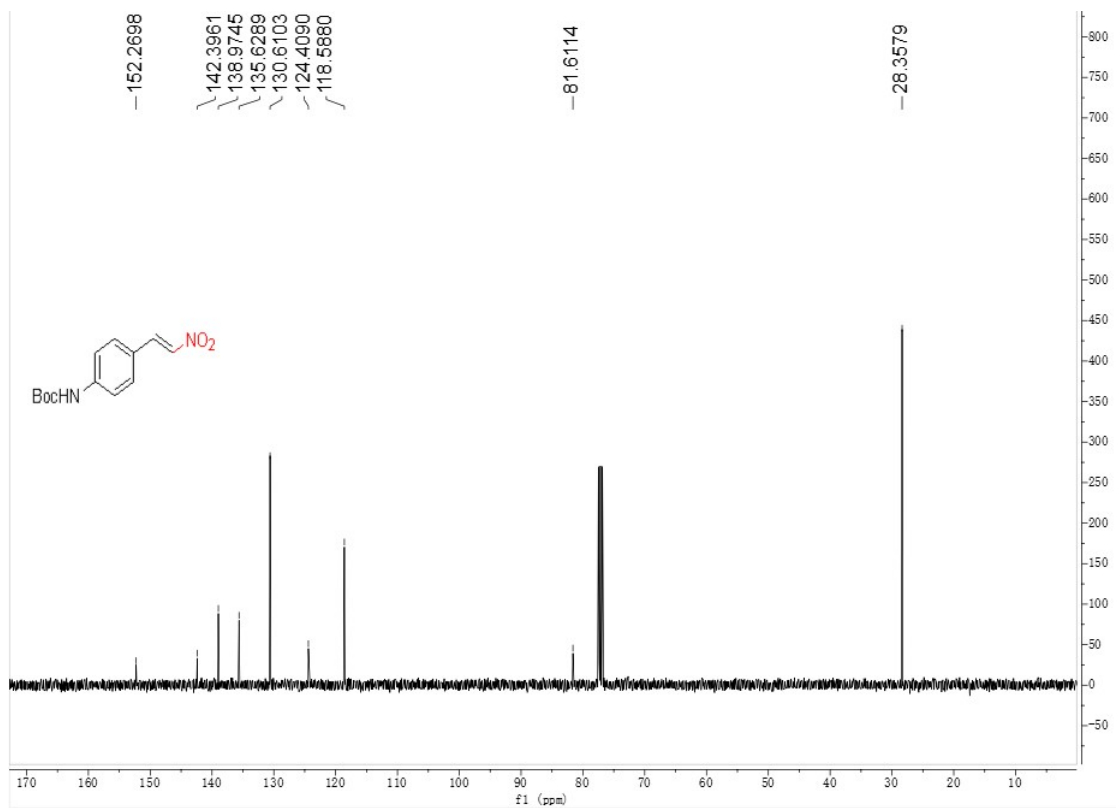

### <sup>1</sup>H NMR of 7k (400 MHz, CDCl<sub>3</sub>)

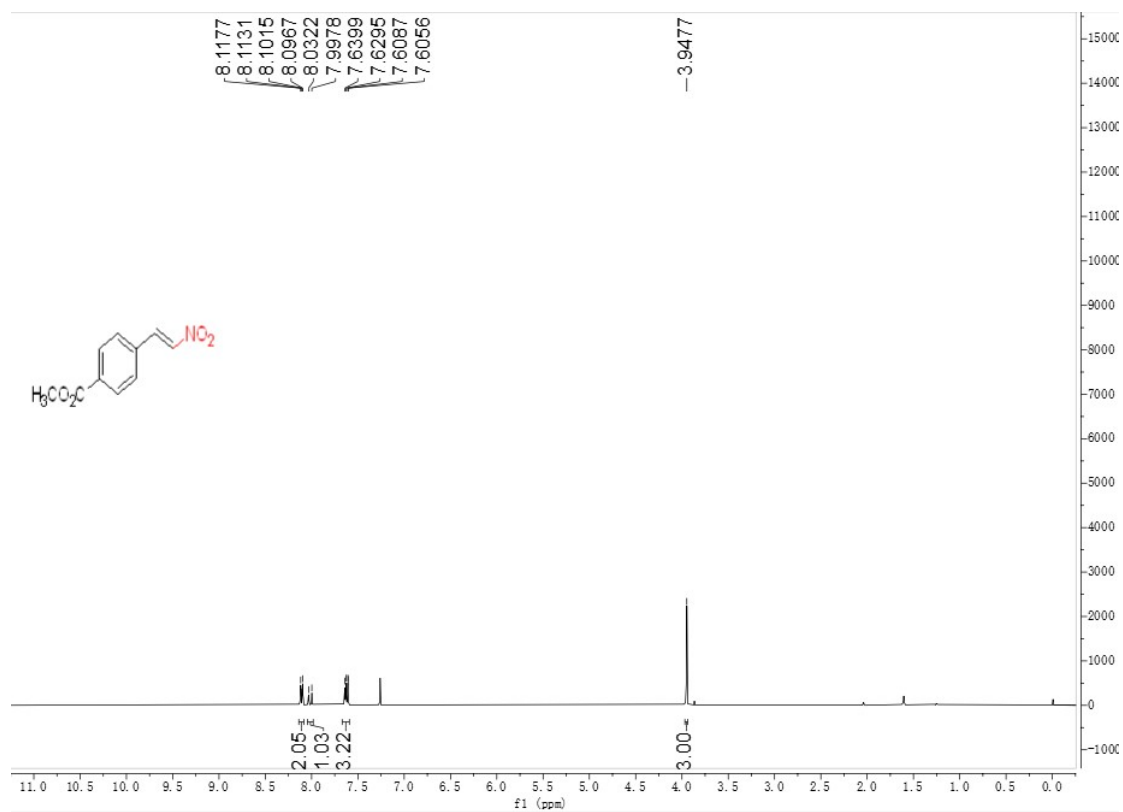

### <sup>13</sup>C NMR of 7k (100 MHz, CDCl<sub>3</sub>)

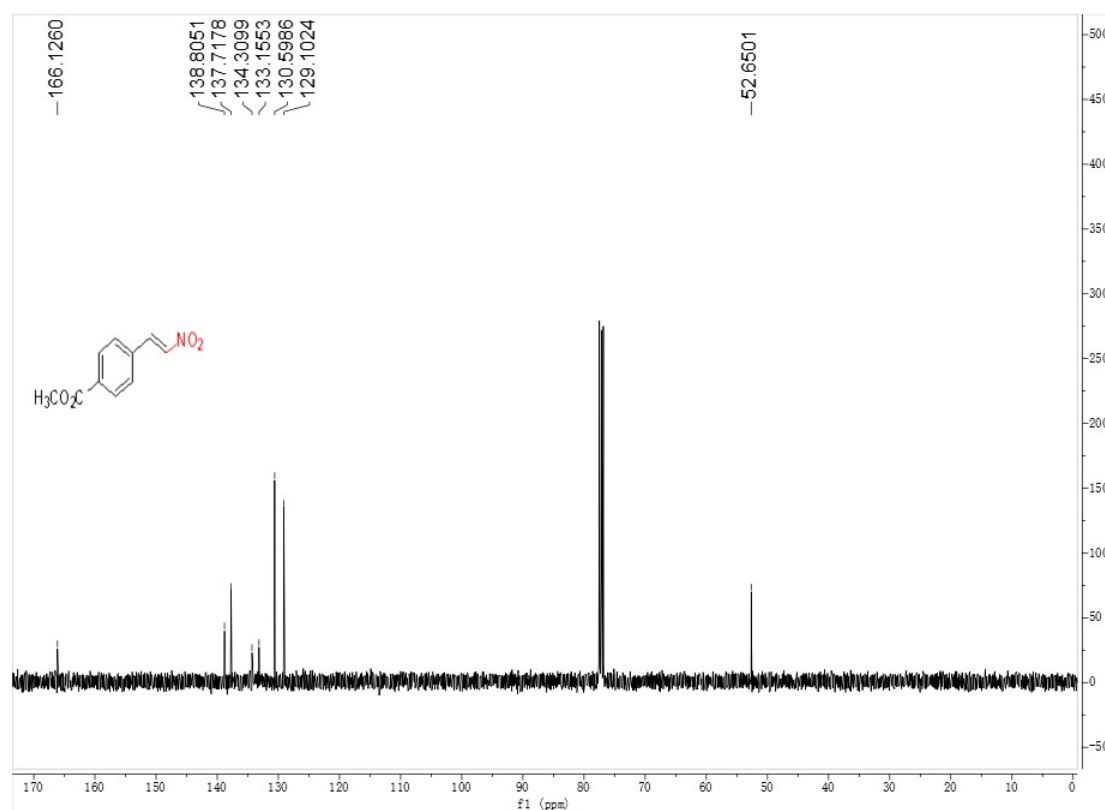

### <sup>1</sup>H NMR of 7l (400 MHz, CDCl<sub>3</sub>)

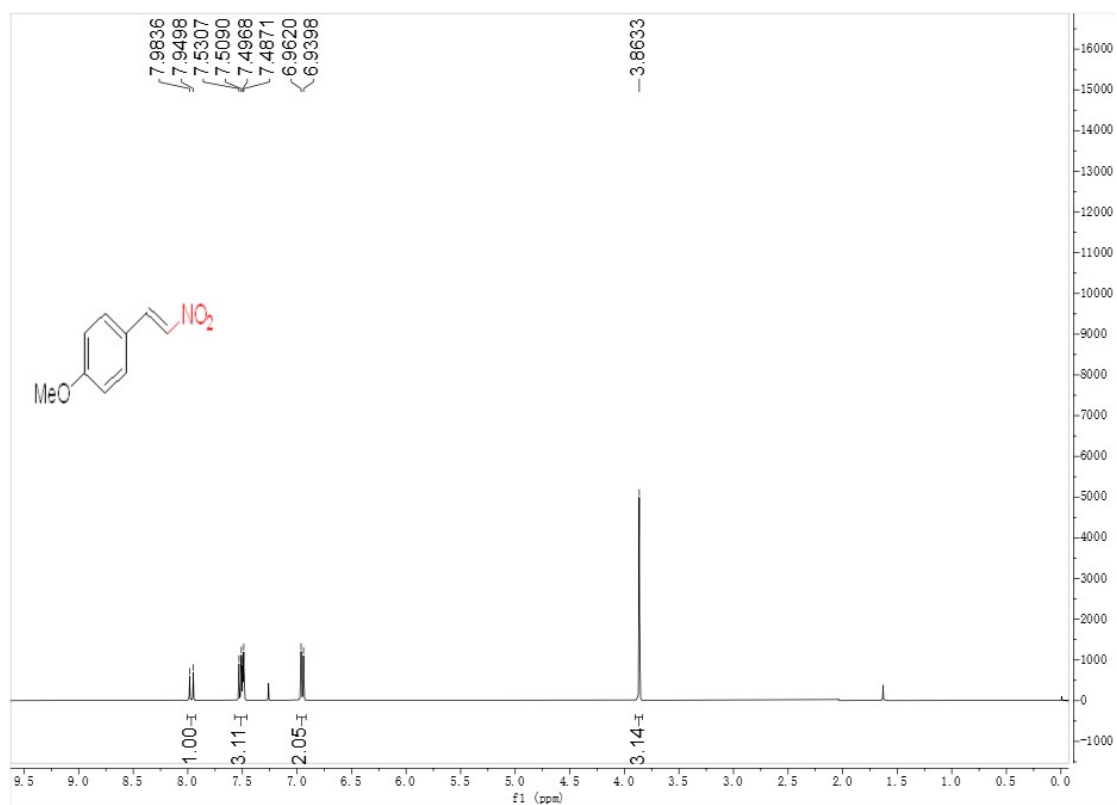

### <sup>13</sup>C NMR of 7l (100 MHz, CDCl<sub>3</sub>)

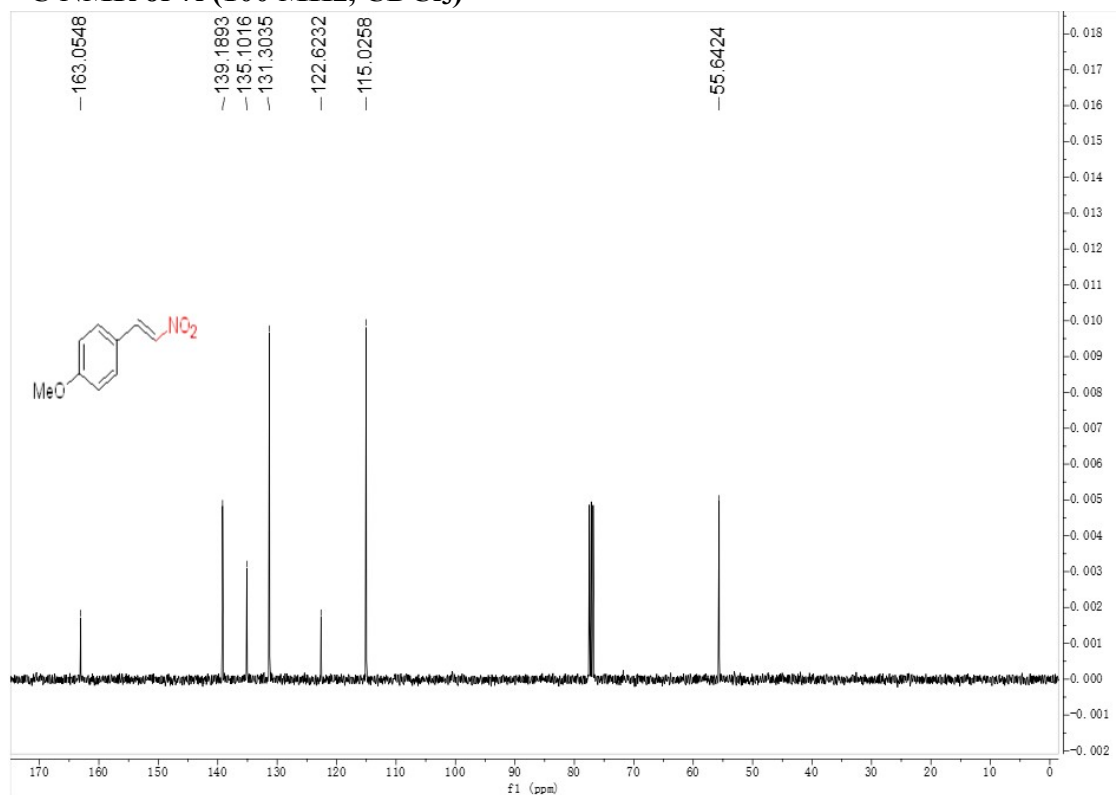

### <sup>1</sup>H NMR of 7m (400 MHz, CDCl<sub>3</sub>)

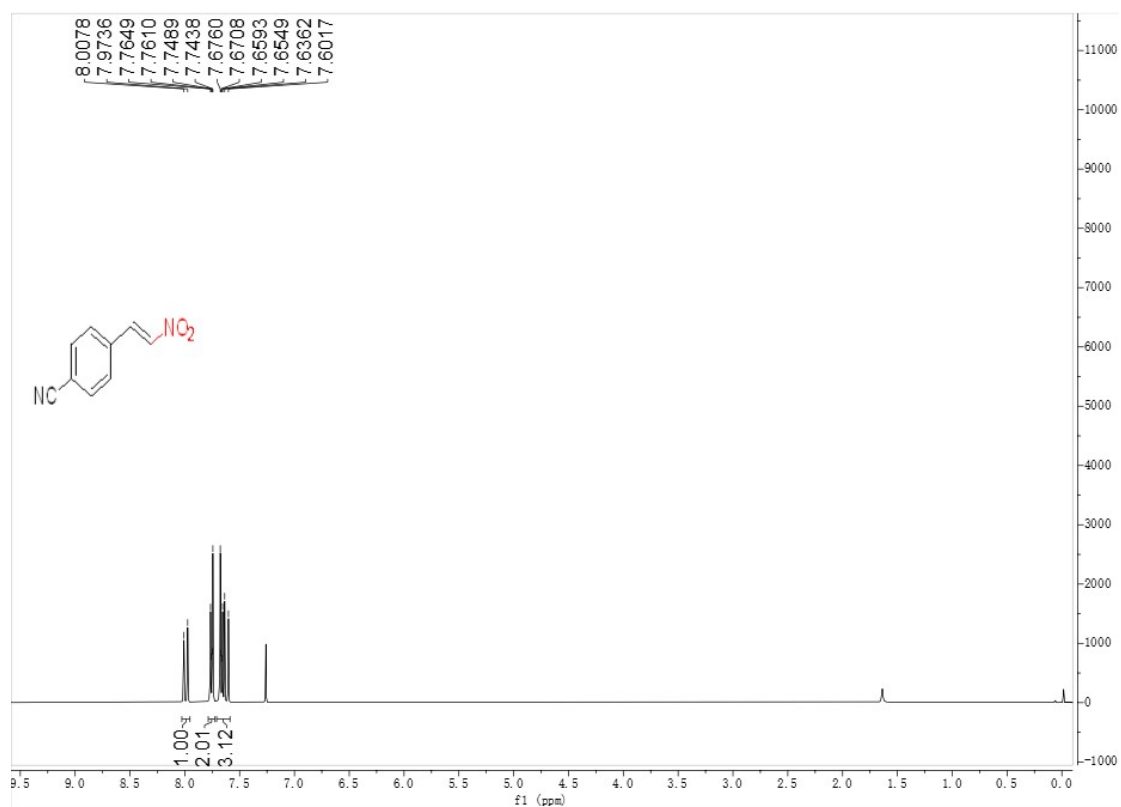

### <sup>13</sup>C NMR of 7m (100 MHz, CDCl<sub>3</sub>)

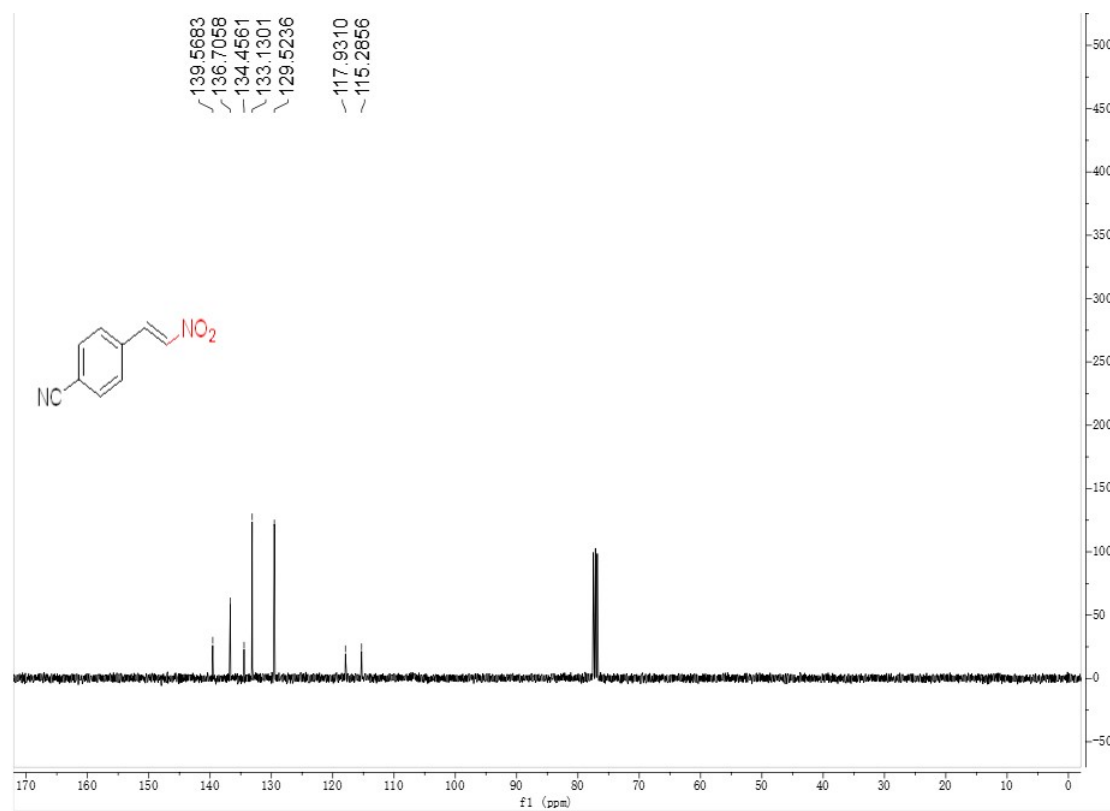

### <sup>1</sup>H NMR of 7n (400 MHz, CDCl<sub>3</sub>)

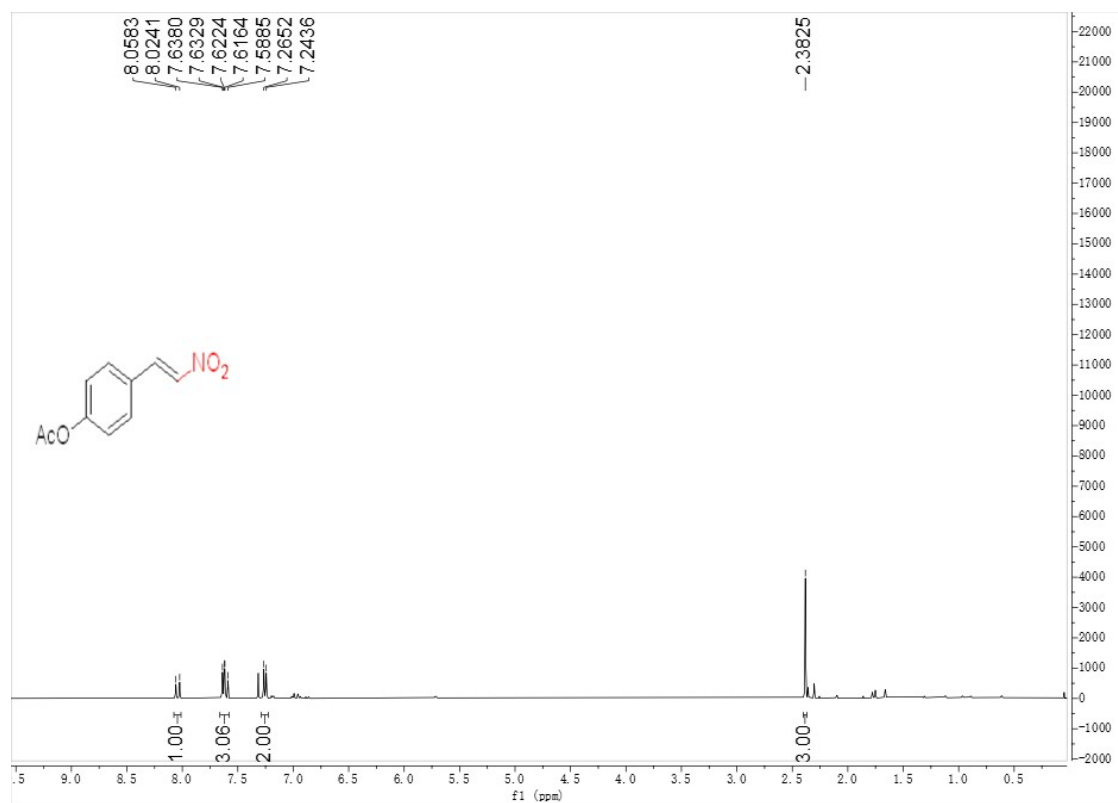

### <sup>13</sup>C NMR of 7n (100 MHz, CDCl<sub>3</sub>)

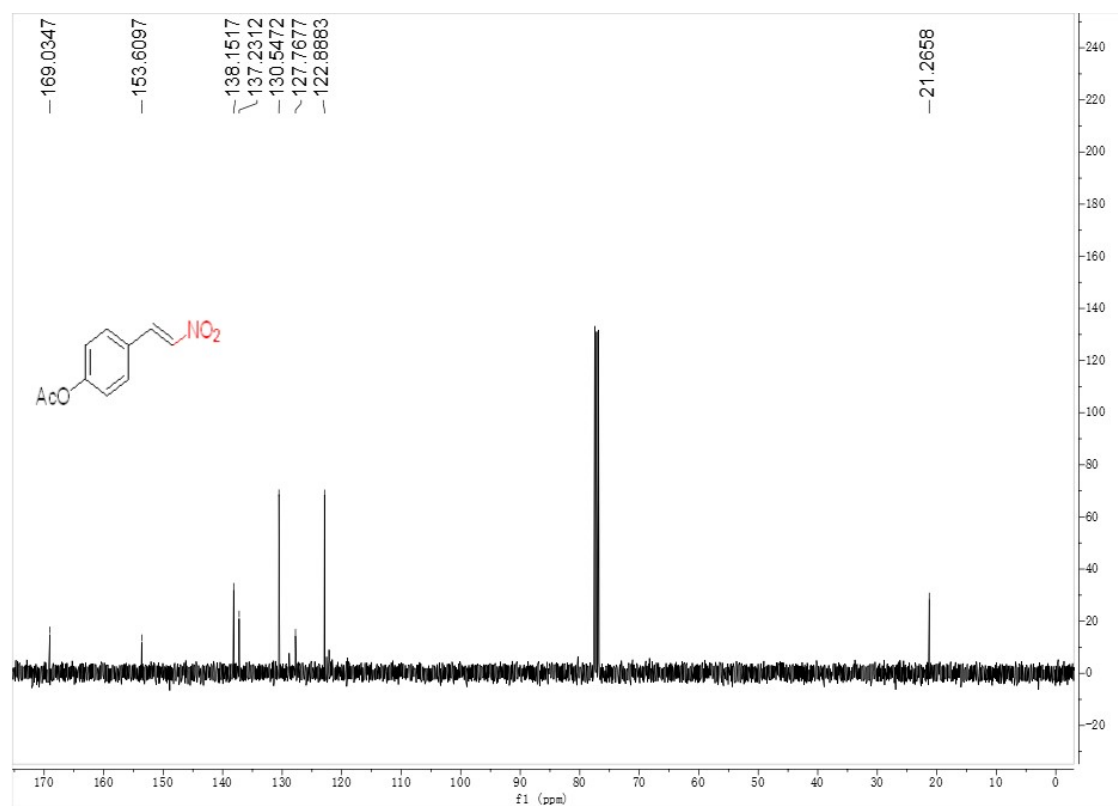

### <sup>1</sup>H NMR of 7o (400 MHz, CDCl<sub>3</sub>)

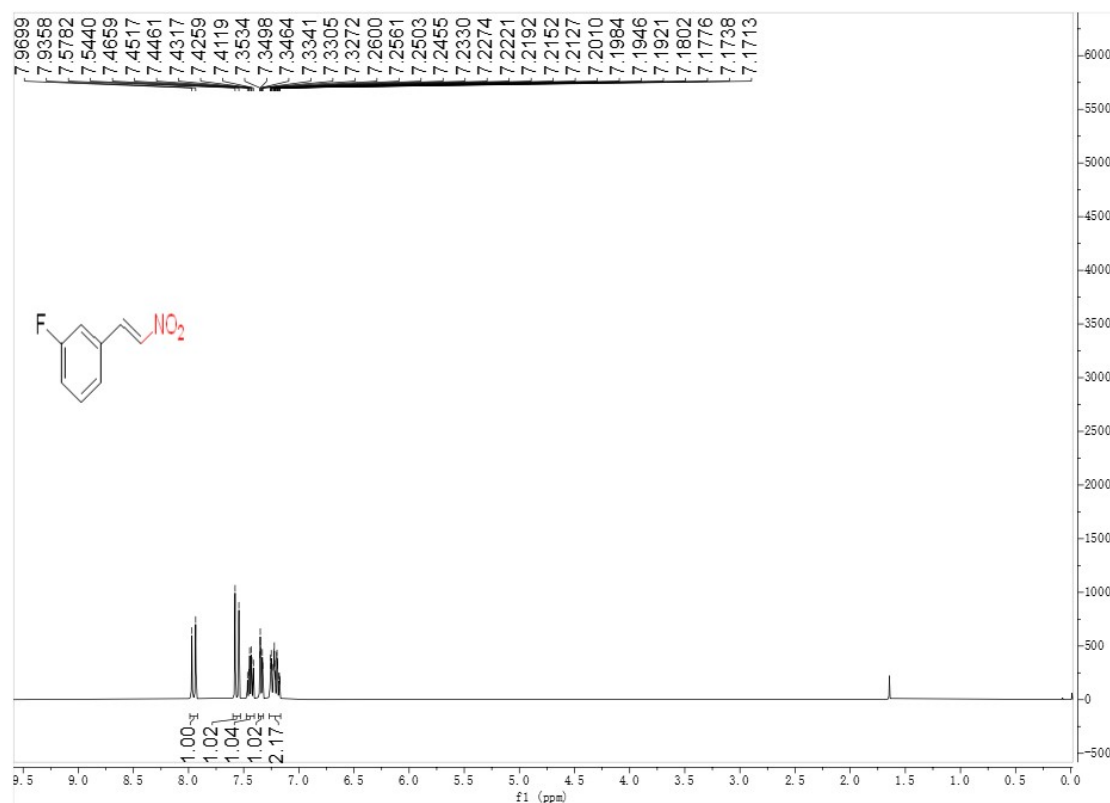

### <sup>13</sup>C NMR of 7o (100 MHz, CDCl<sub>3</sub>)

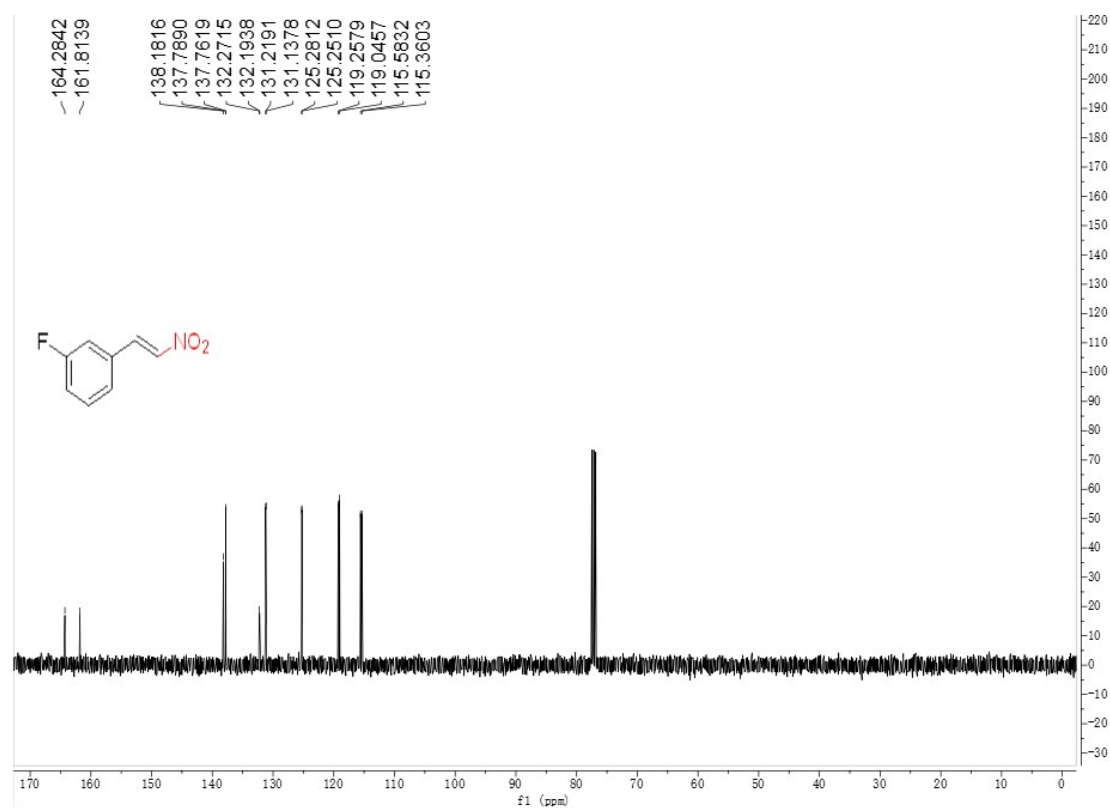

### <sup>1</sup>H NMR of 7p (400 MHz, CDCl<sub>3</sub>)

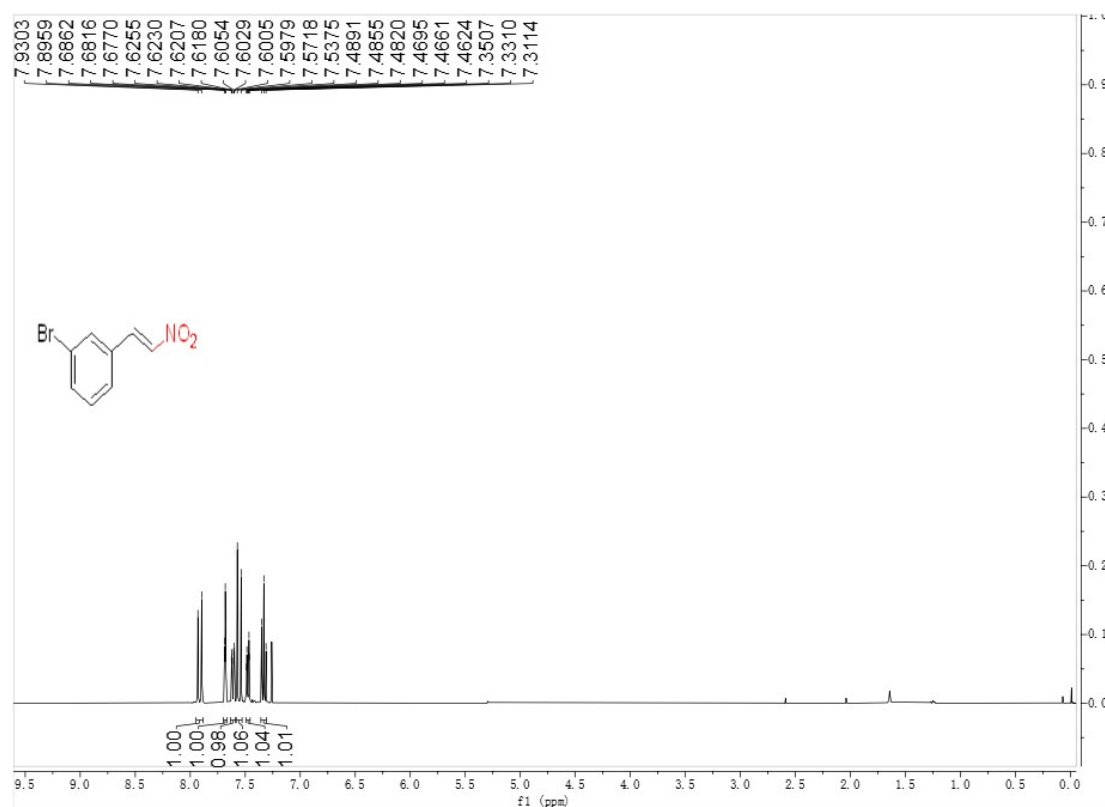

### <sup>13</sup>C NMR of 7p (100 MHz, CDCl<sub>3</sub>)

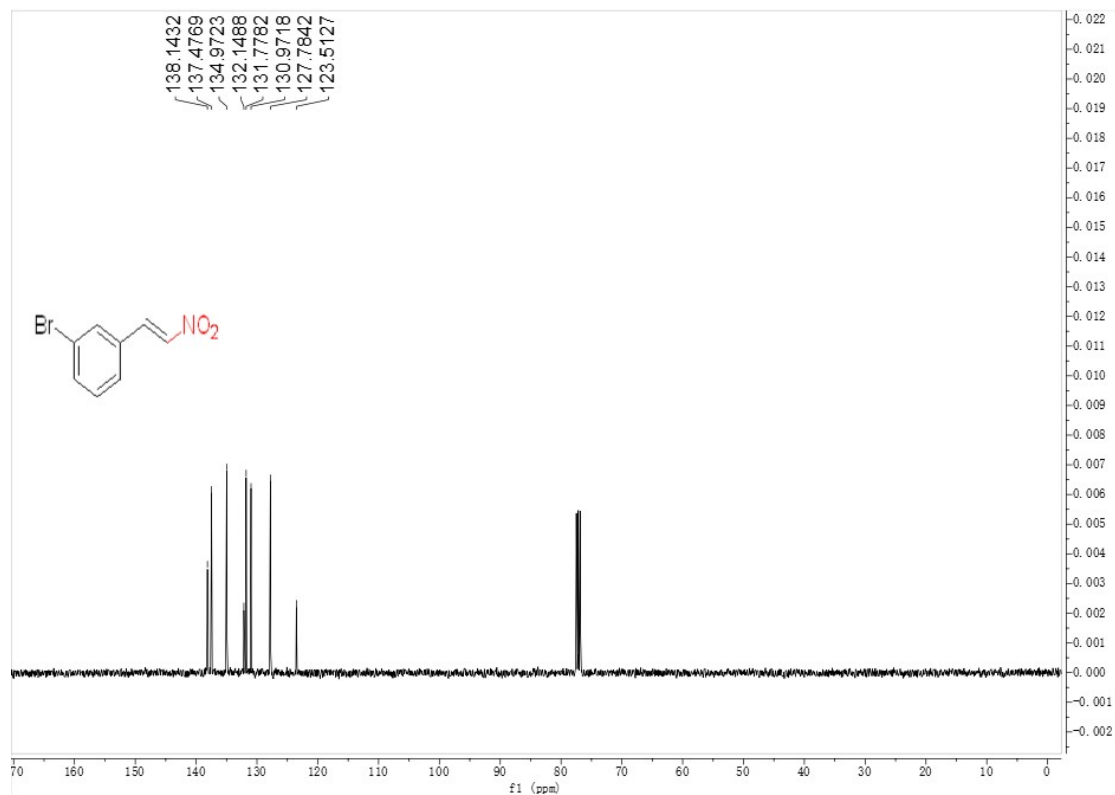

### <sup>1</sup>H NMR of 7q (400 MHz, CDCl<sub>3</sub>)

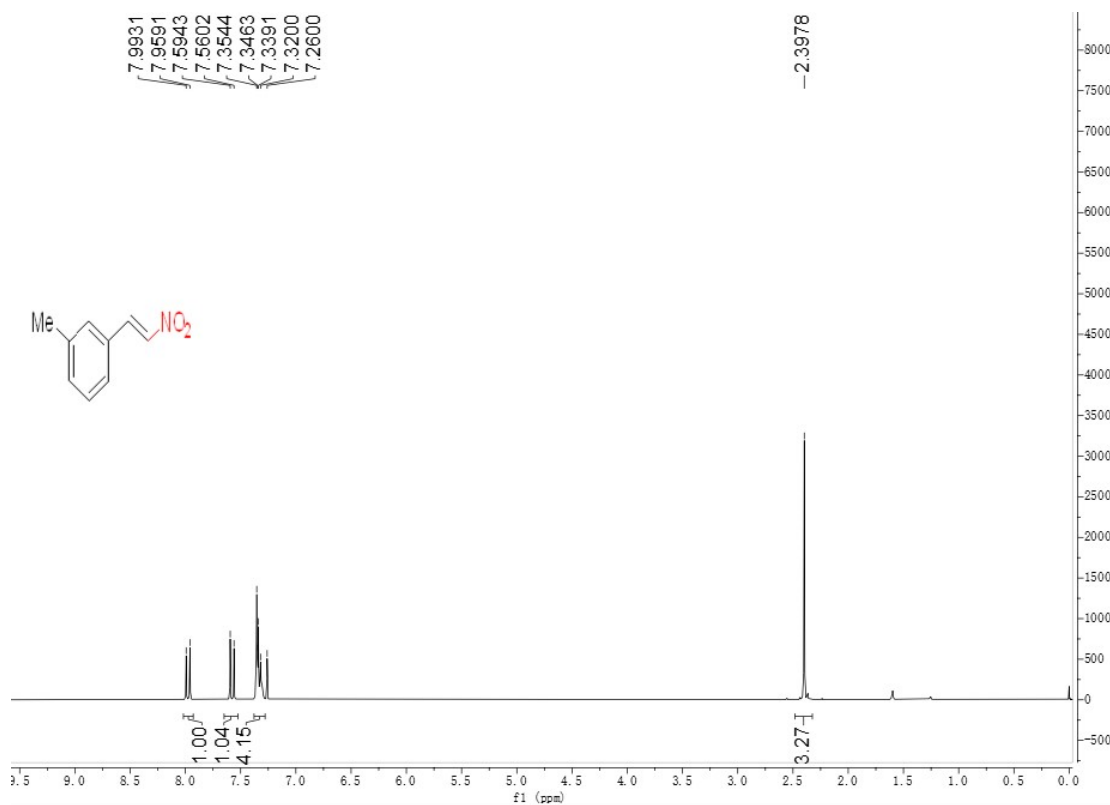

### <sup>13</sup>C NMR of 7q (100 MHz, CDCl<sub>3</sub>)

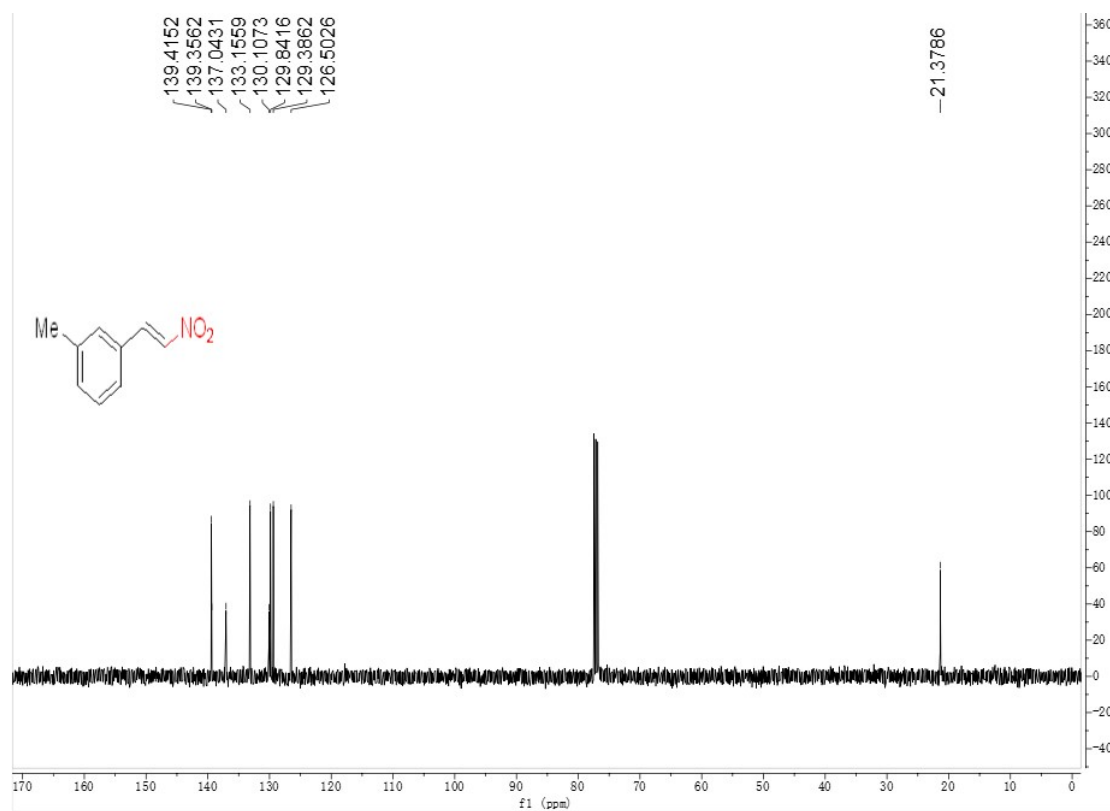



### <sup>1</sup>H NMR of 7r (400 MHz, CDCl<sub>3</sub>)

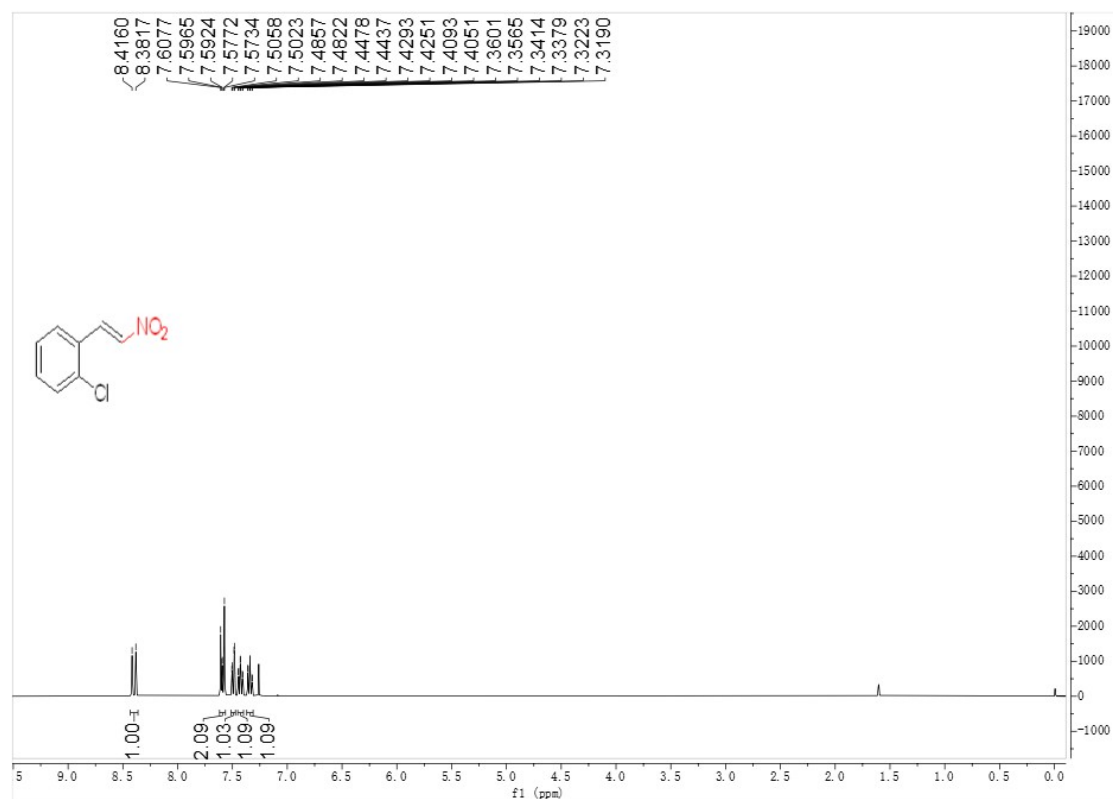

### <sup>13</sup>C NMR of 7r (100 MHz, CDCl<sub>3</sub>)

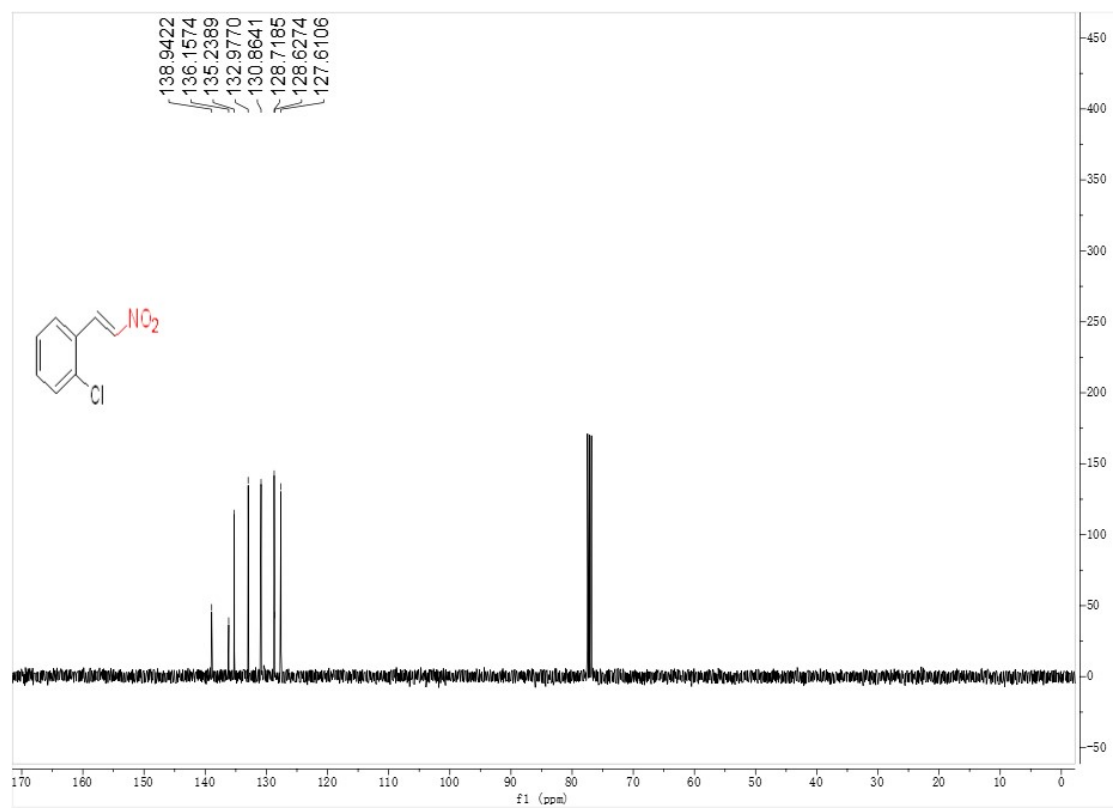

### <sup>1</sup>H NMR of 7s (400 MHz, CDCl<sub>3</sub>)

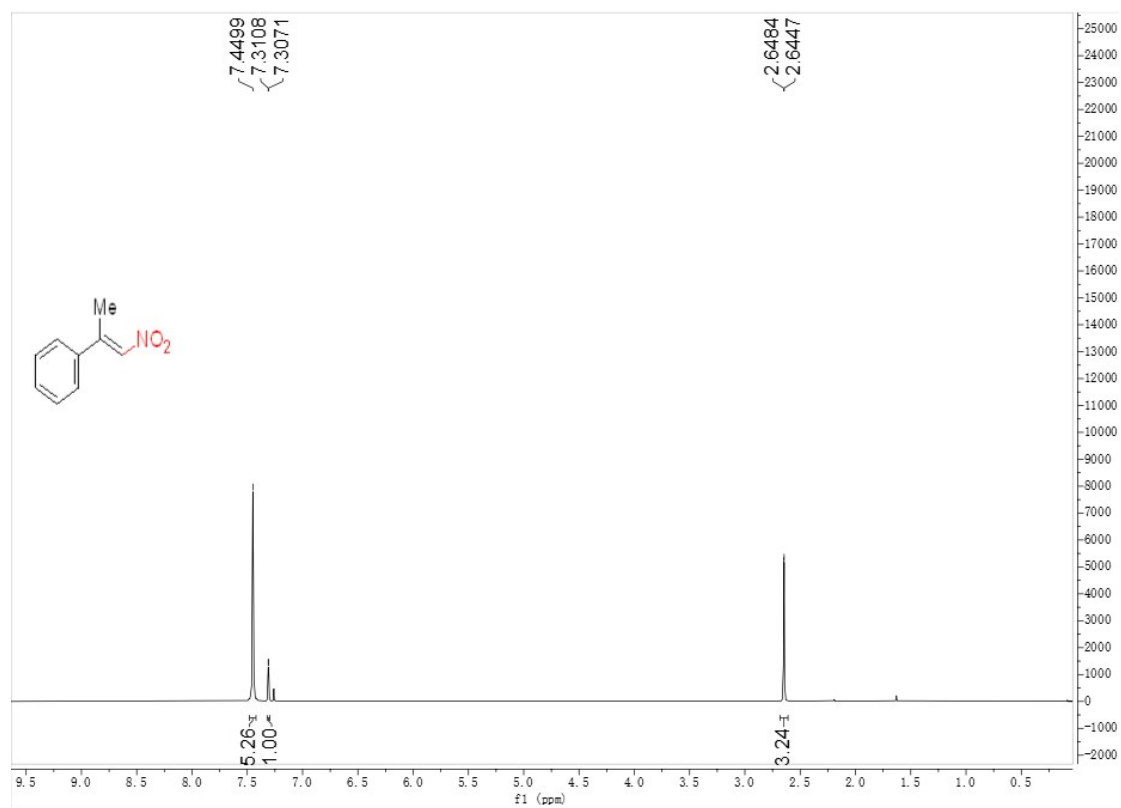

### <sup>13</sup>C NMR of 7s (100 MHz, CDCl<sub>3</sub>)

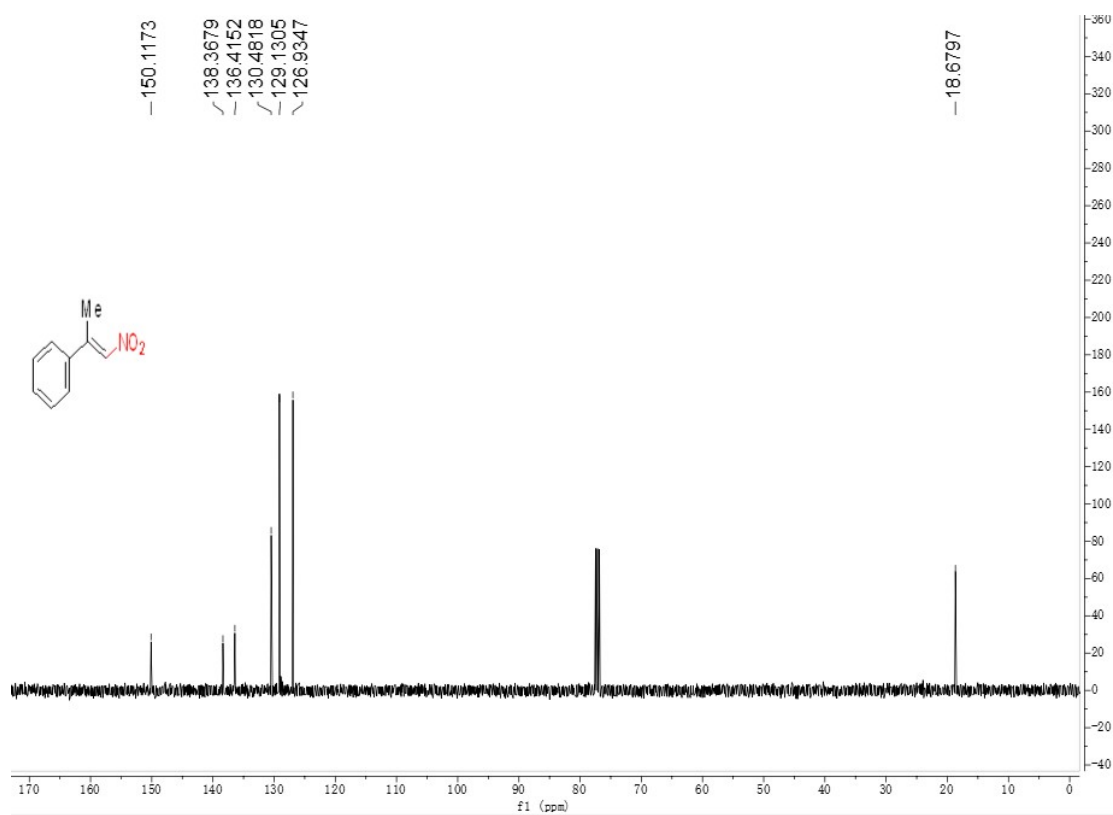

### <sup>1</sup>H NMR of 7t (400 MHz, CDCl<sub>3</sub>)

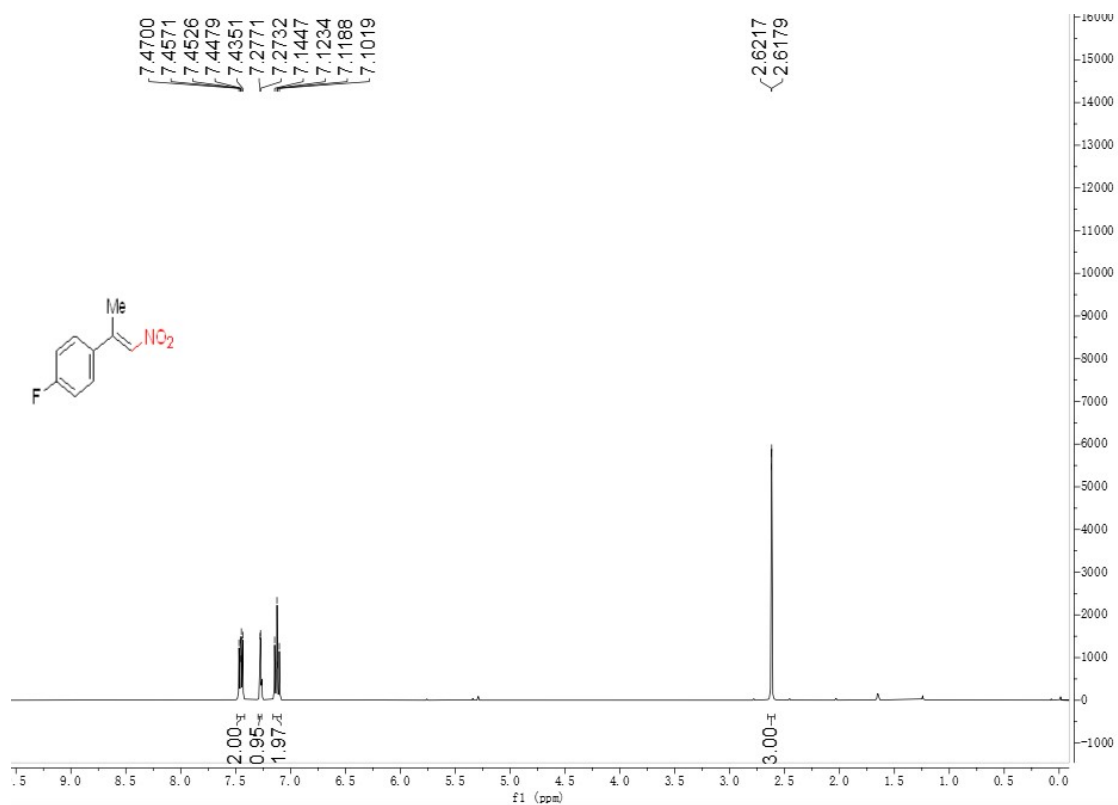

### <sup>13</sup>C NMR of 7t (100 MHz, CDCl<sub>3</sub>)

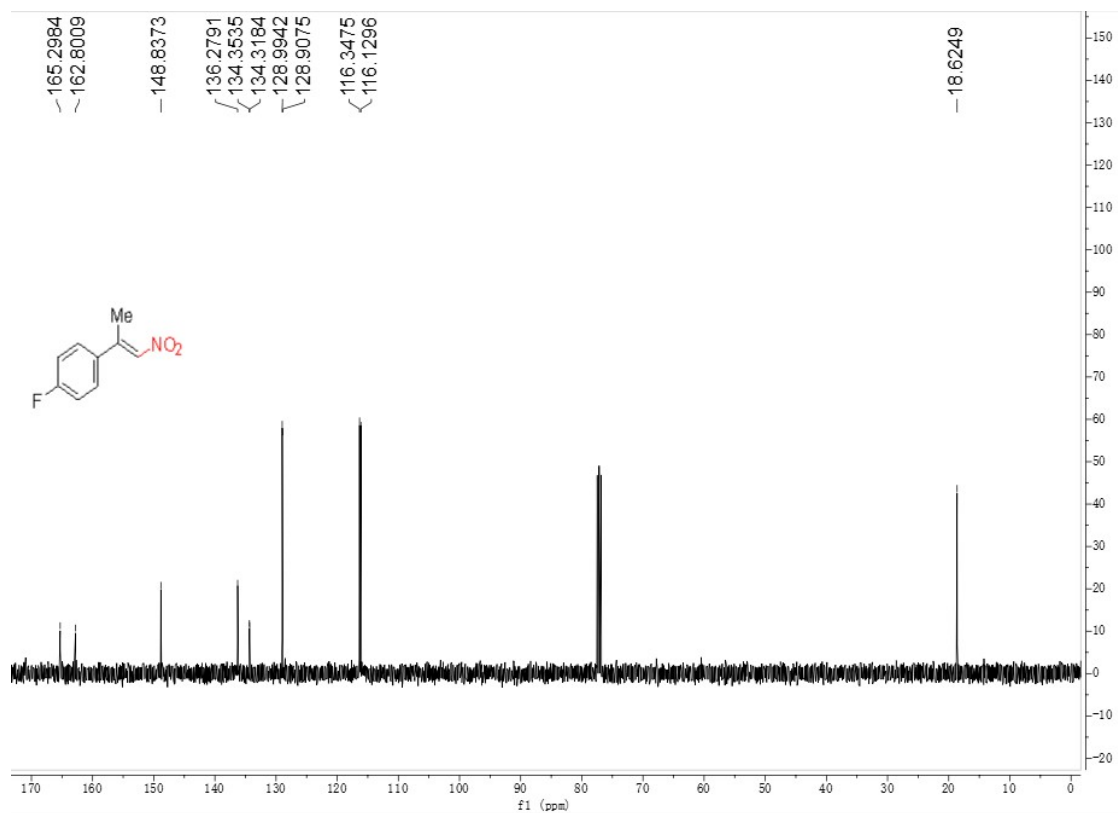

### <sup>1</sup>H NMR of 7u (400 MHz, CDCl<sub>3</sub>)

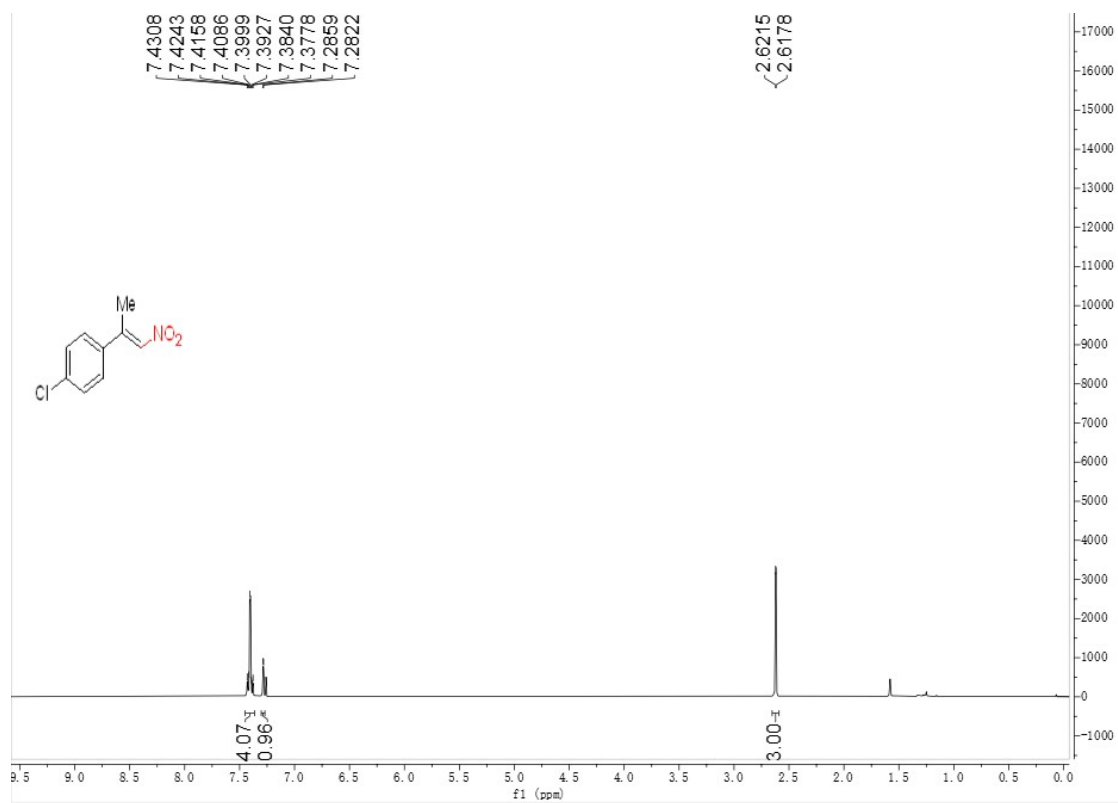

### <sup>13</sup>C NMR of 7u (100 MHz, CDCl<sub>3</sub>)

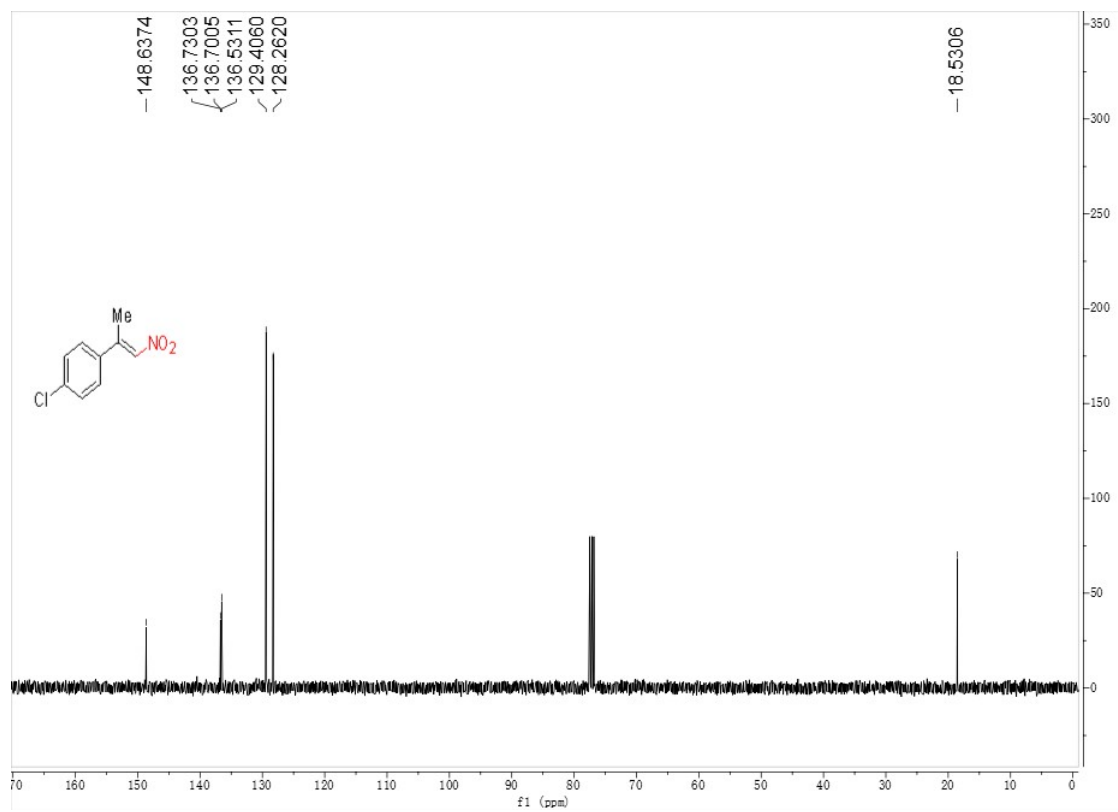

### <sup>1</sup>H NMR of 7v (400 MHz, CDCl<sub>3</sub>)

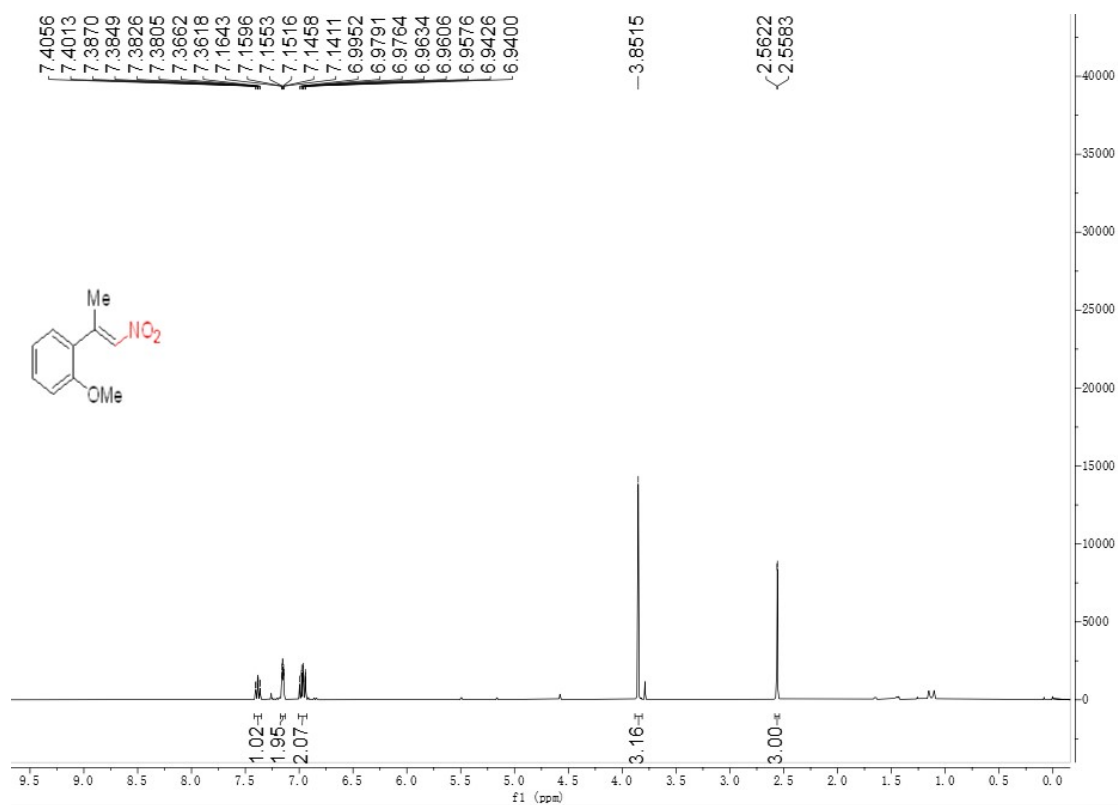

### <sup>13</sup>C NMR of 7v (100 MHz, CDCl<sub>3</sub>)

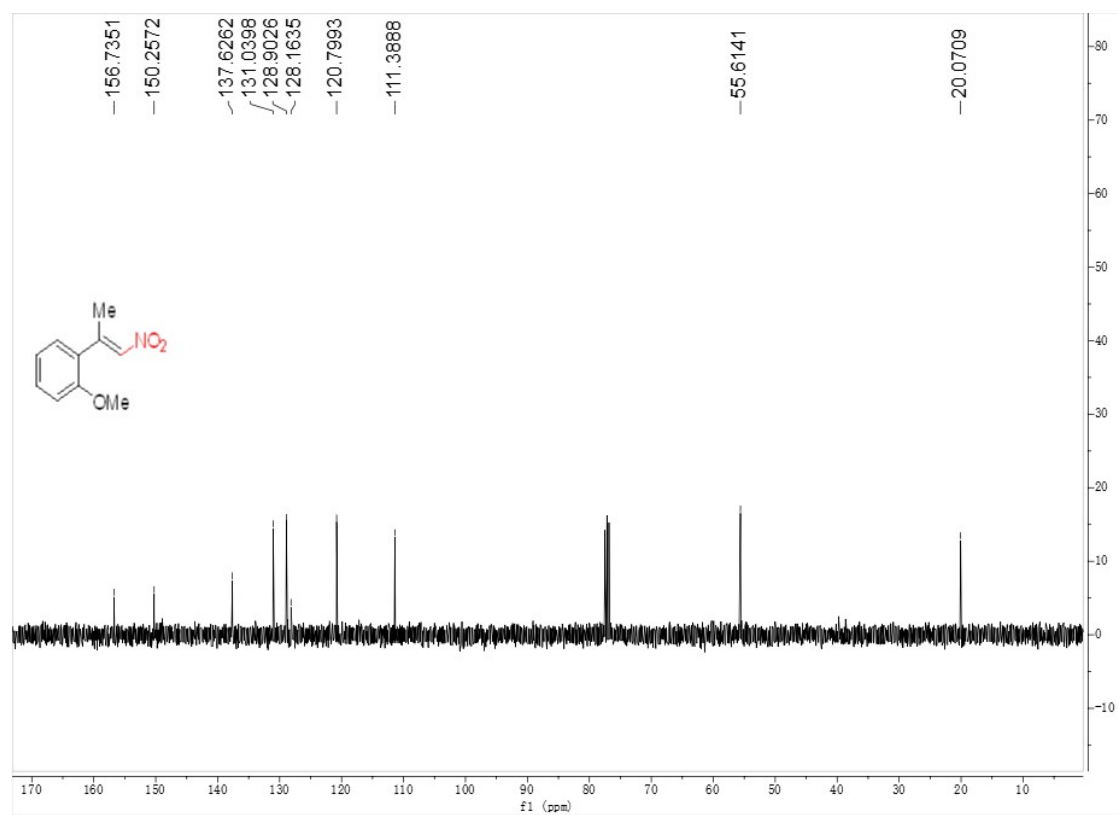

### <sup>1</sup>H NMR of 7w (400 MHz, CDCl<sub>3</sub>)

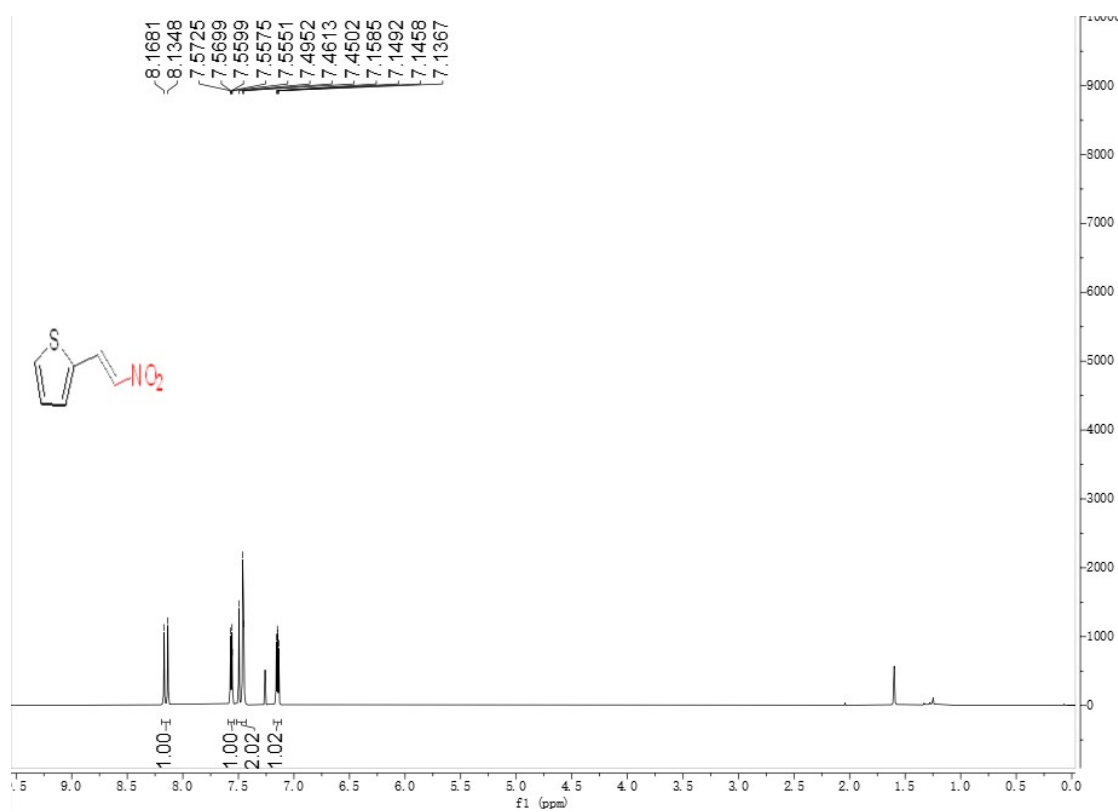

### <sup>13</sup>C NMR of 7w (100 MHz, CDCl<sub>3</sub>)

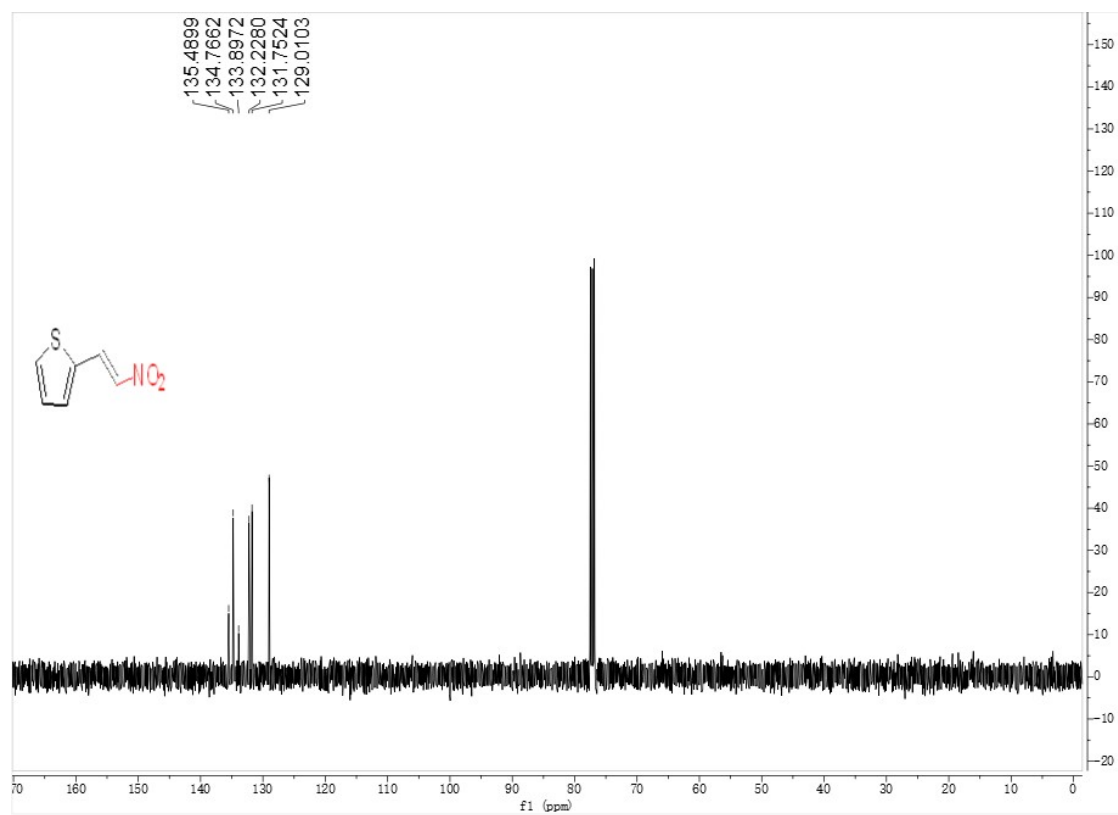

### <sup>1</sup>H NMR of 7x (400 MHz, CDCl<sub>3</sub>)

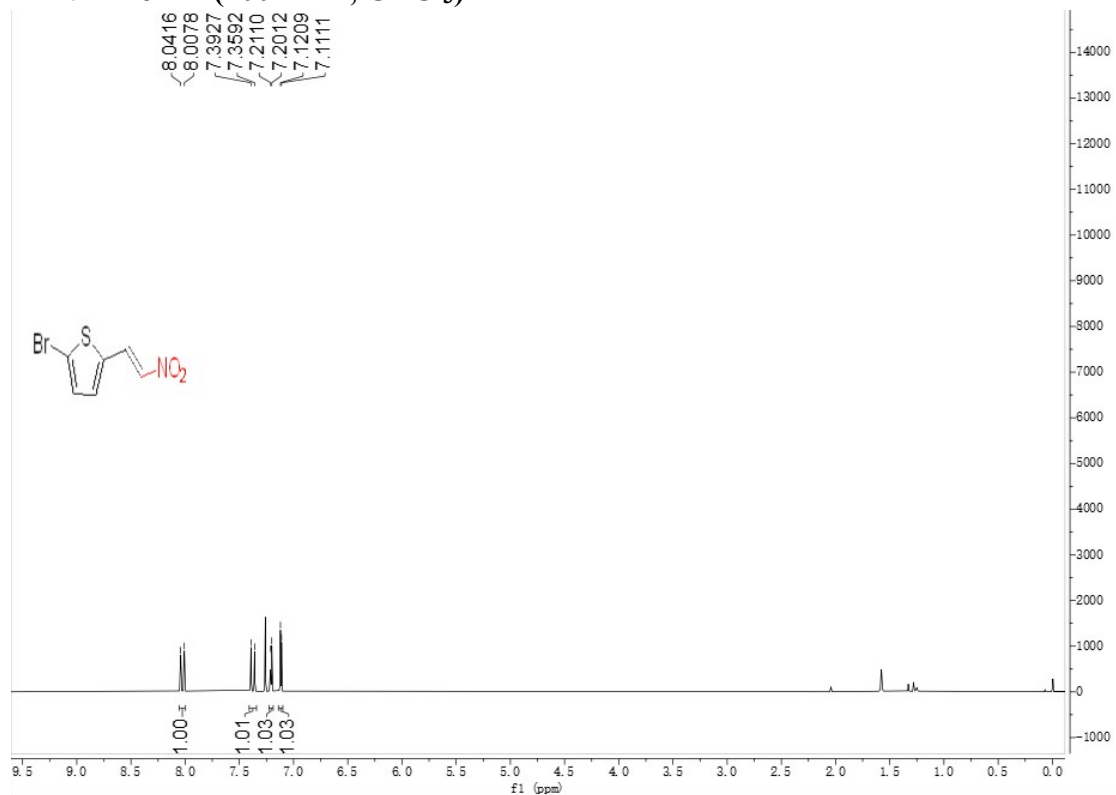

### <sup>13</sup>C NMR of 7x (100 MHz, CDCl<sub>3</sub>)

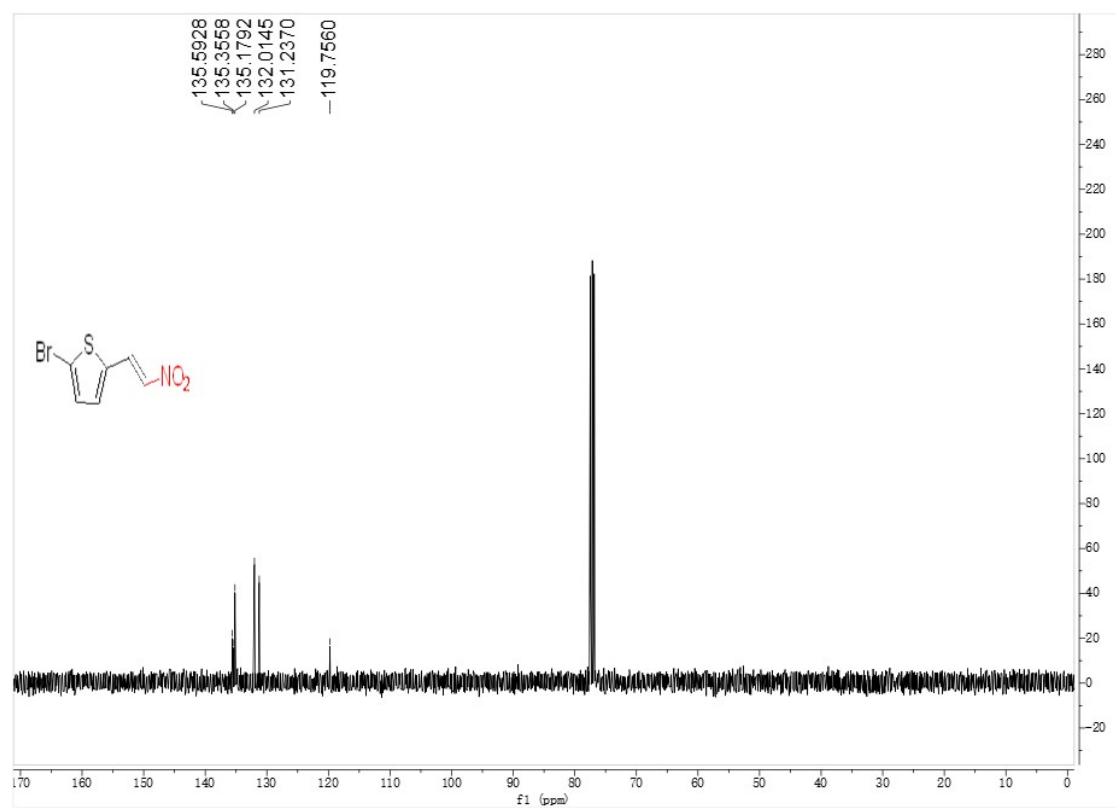

### <sup>1</sup>H NMR of 7y (400 MHz, CDCl<sub>3</sub>)

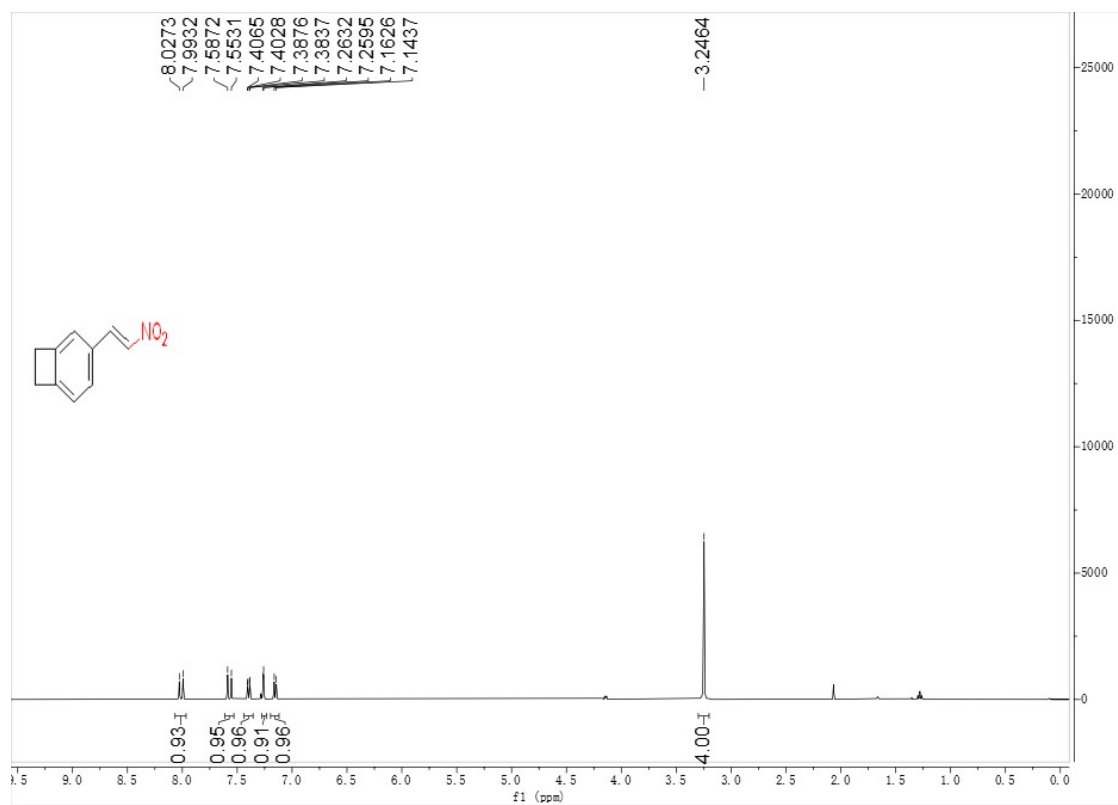

### <sup>13</sup>C NMR of 7y (100 MHz, CDCl<sub>3</sub>)

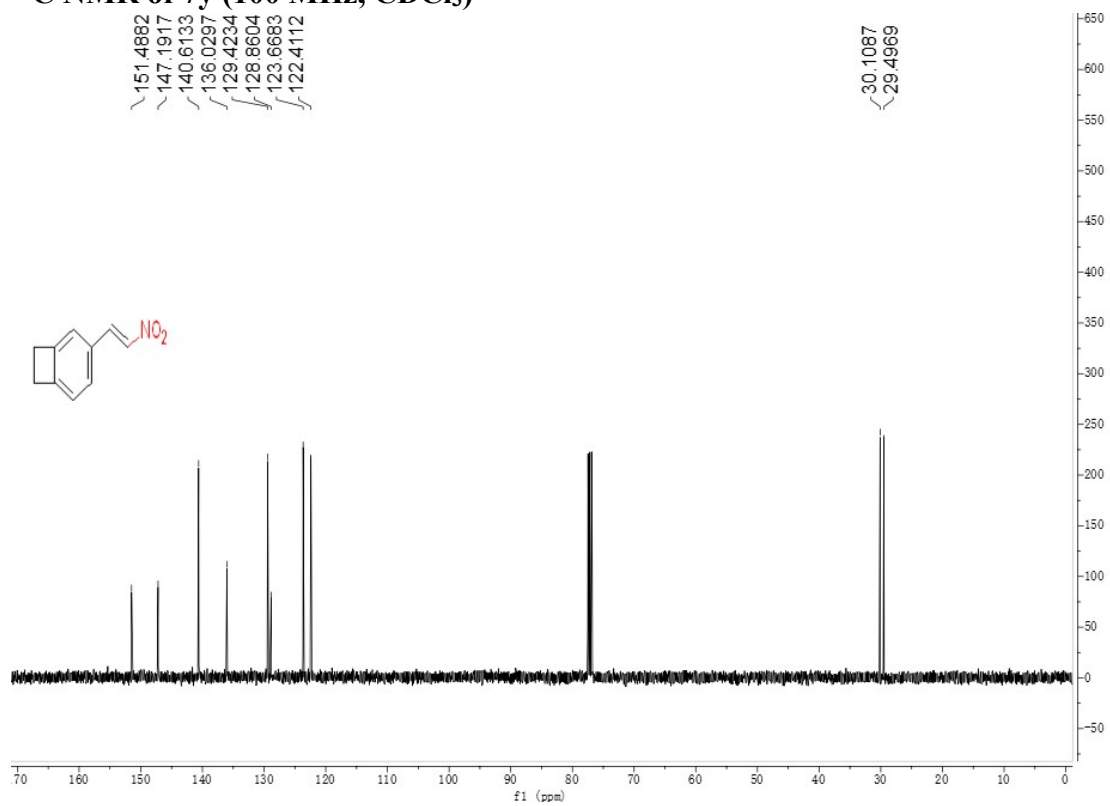



### <sup>1</sup>H NMR of 7z (400 MHz, CDCl<sub>3</sub>)

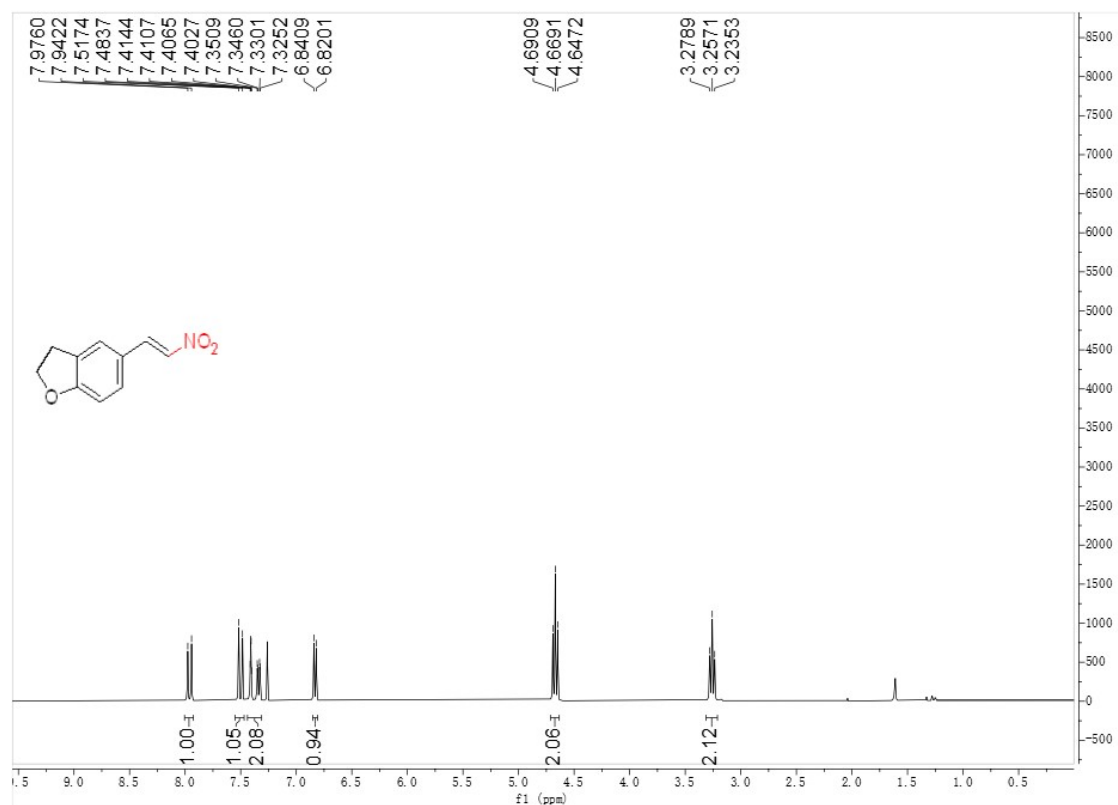

### <sup>13</sup>C NMR of 7z (100 MHz, CDCl<sub>3</sub>)

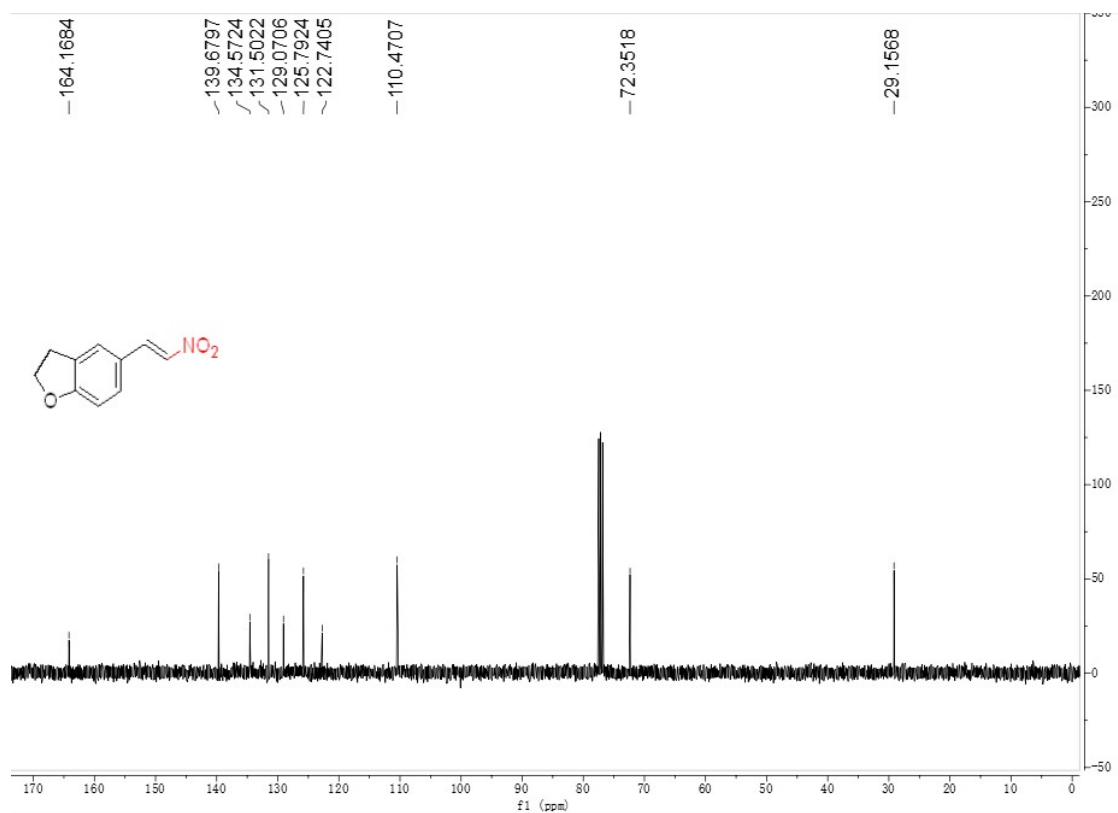

### <sup>1</sup>H NMR of 7aa (400 MHz, CDCl<sub>3</sub>)

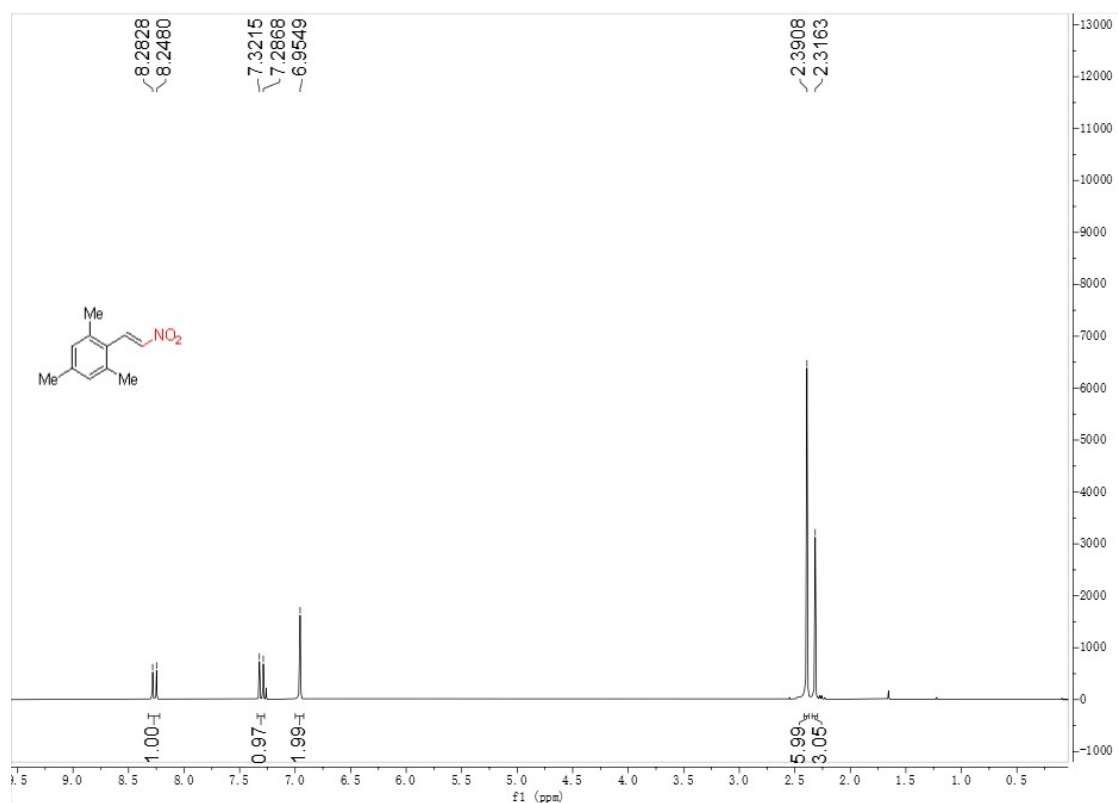

### <sup>13</sup>C NMR of 7aa (100 MHz, CDCl<sub>3</sub>)

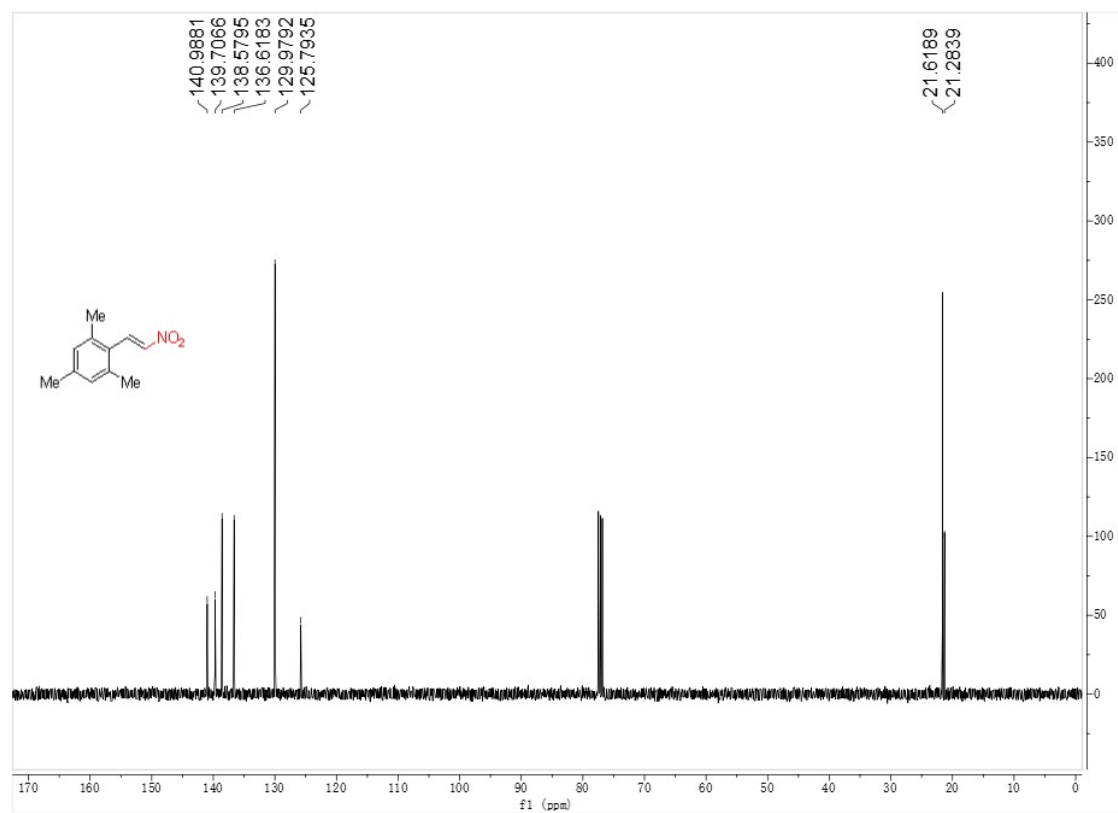

### <sup>1</sup>H NMR of 7ab (400 MHz, CDCl<sub>3</sub>)

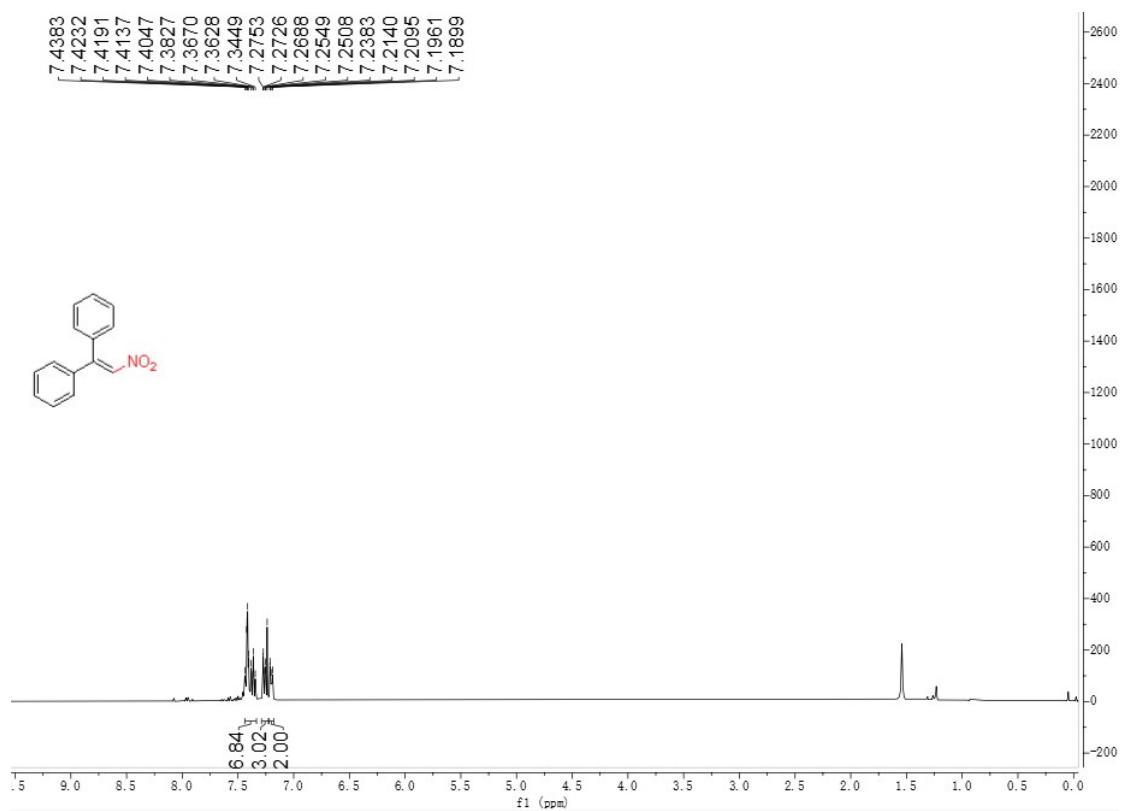

### <sup>13</sup>C NMR of 7ab (100 MHz, CDCl<sub>3</sub>)

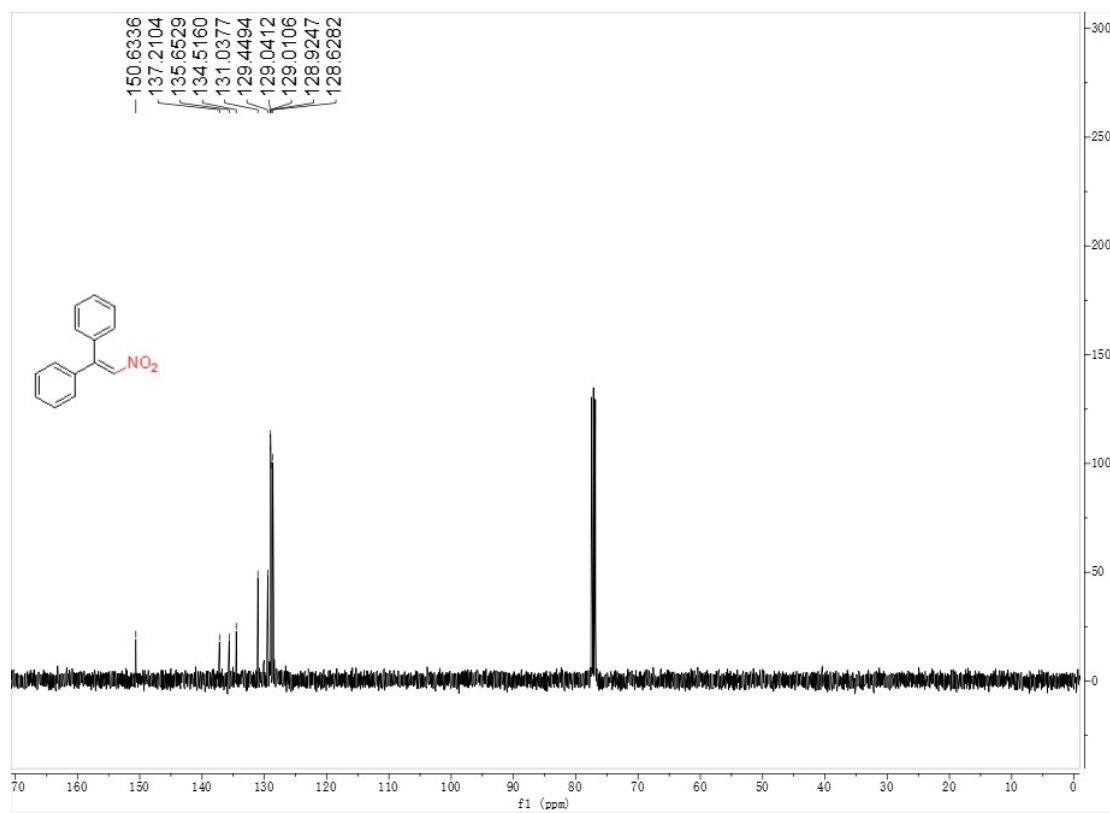

### <sup>1</sup>H NMR of 7ac (400 MHz, CDCl<sub>3</sub>)

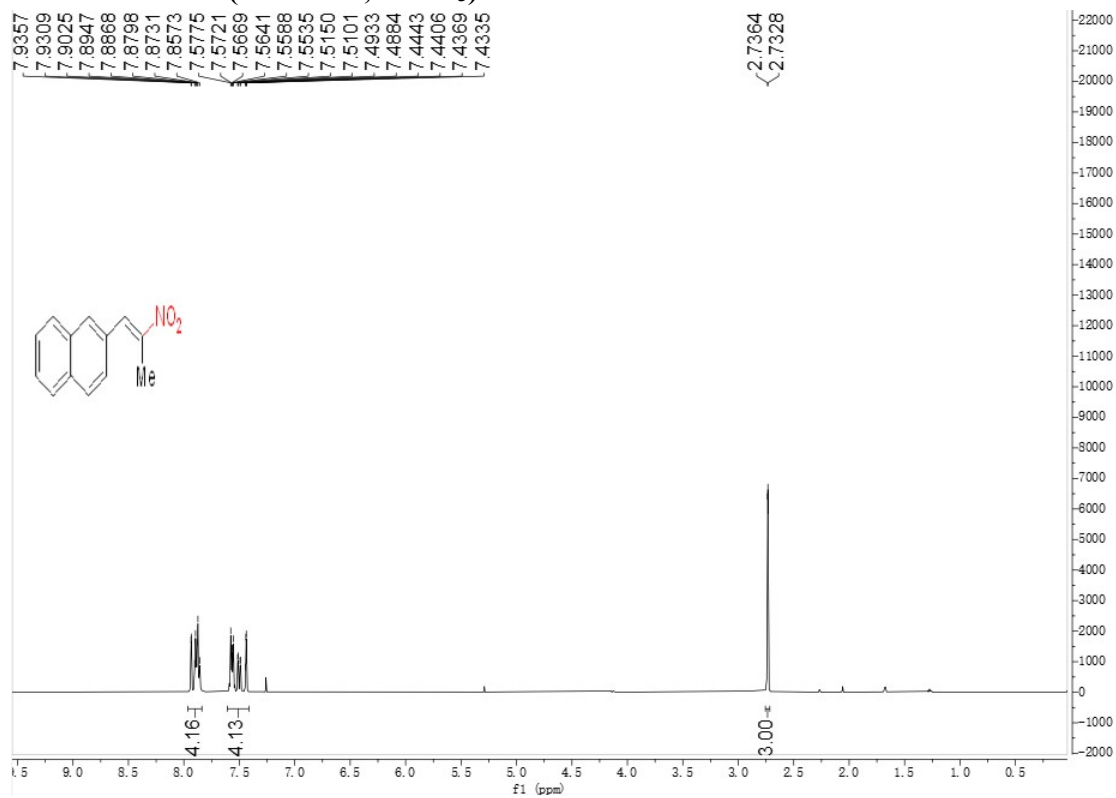

### <sup>13</sup>C NMR of 7ac (100 MHz, CDCl<sub>3</sub>)

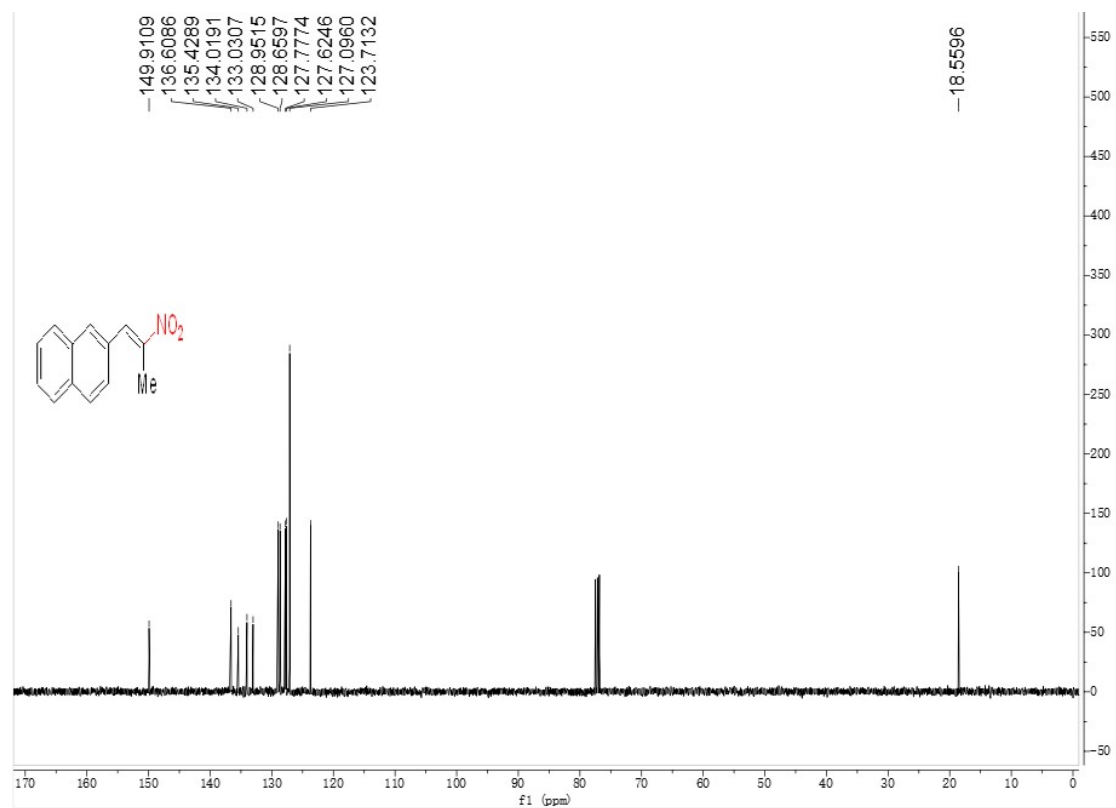

### <sup>1</sup>H NMR of 7ad (400 MHz, CDCl<sub>3</sub>)

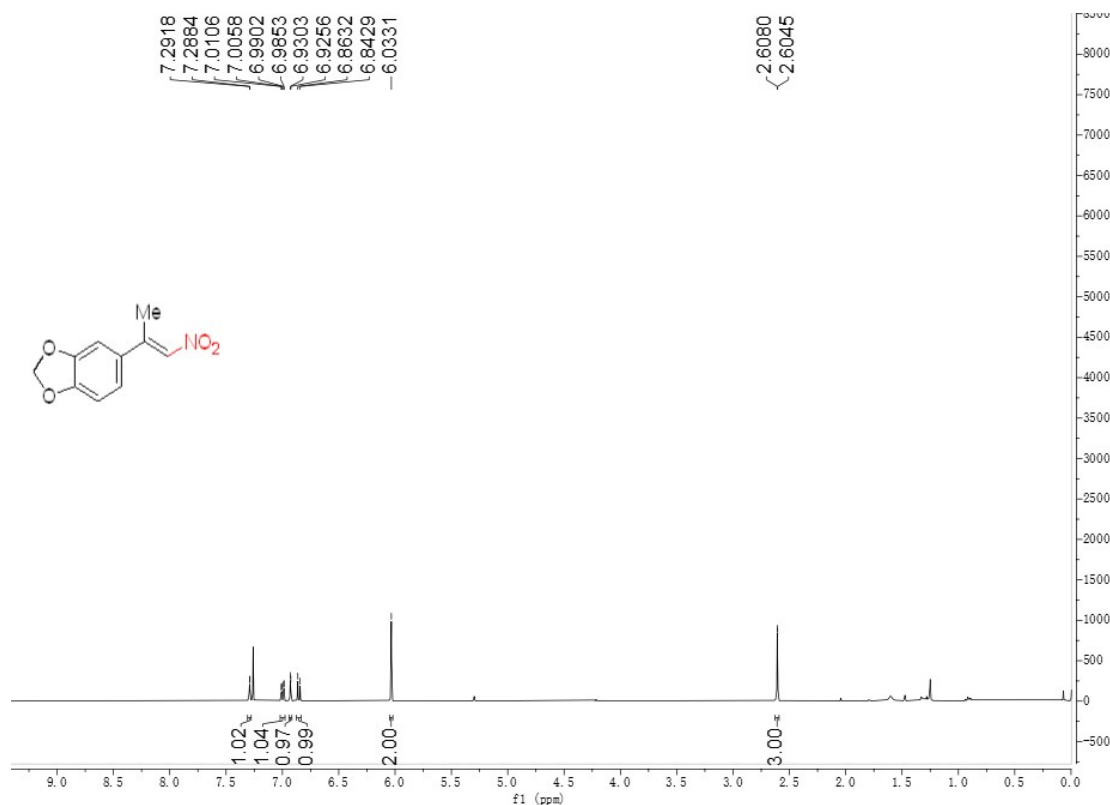

### <sup>13</sup>C NMR of 7ad (100 MHz, CDCl<sub>3</sub>)

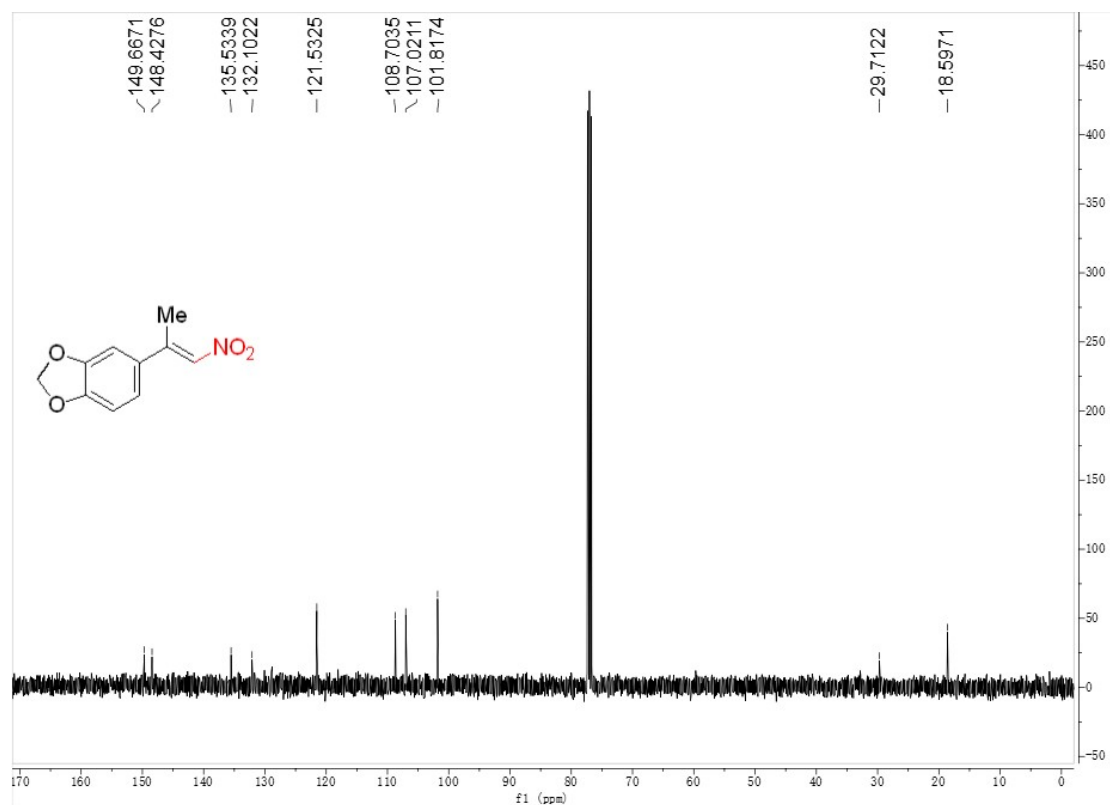

### <sup>1</sup>H NMR of 7ae (400 MHz, CDCl<sub>3</sub>)

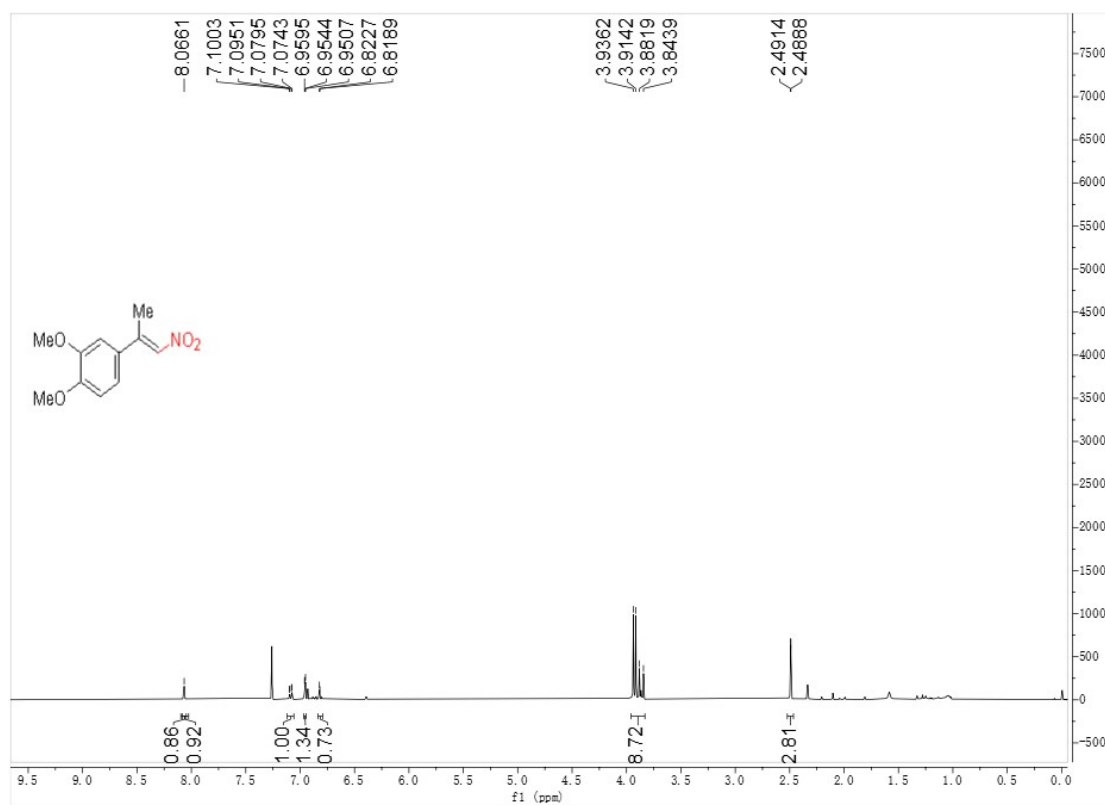

### <sup>13</sup>C NMR of 7ae (100 MHz, CDCl<sub>3</sub>)

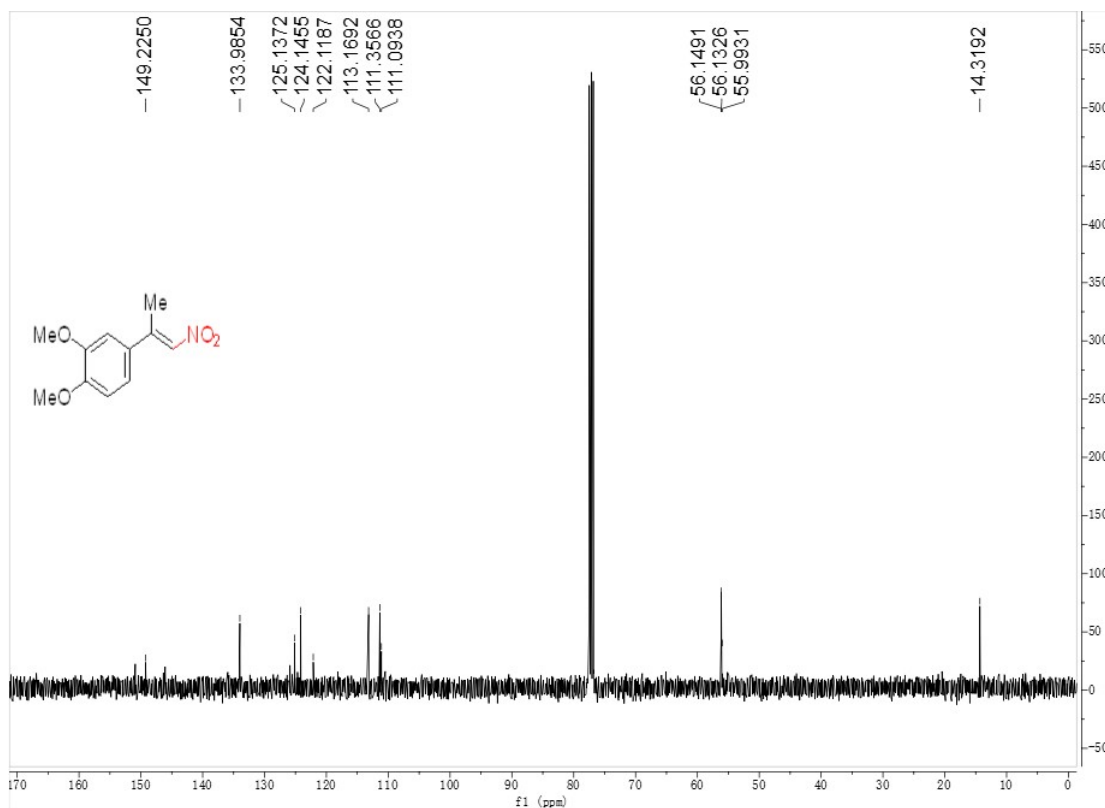

### <sup>1</sup>H NMR of 7af (400 MHz, CDCl<sub>3</sub>)

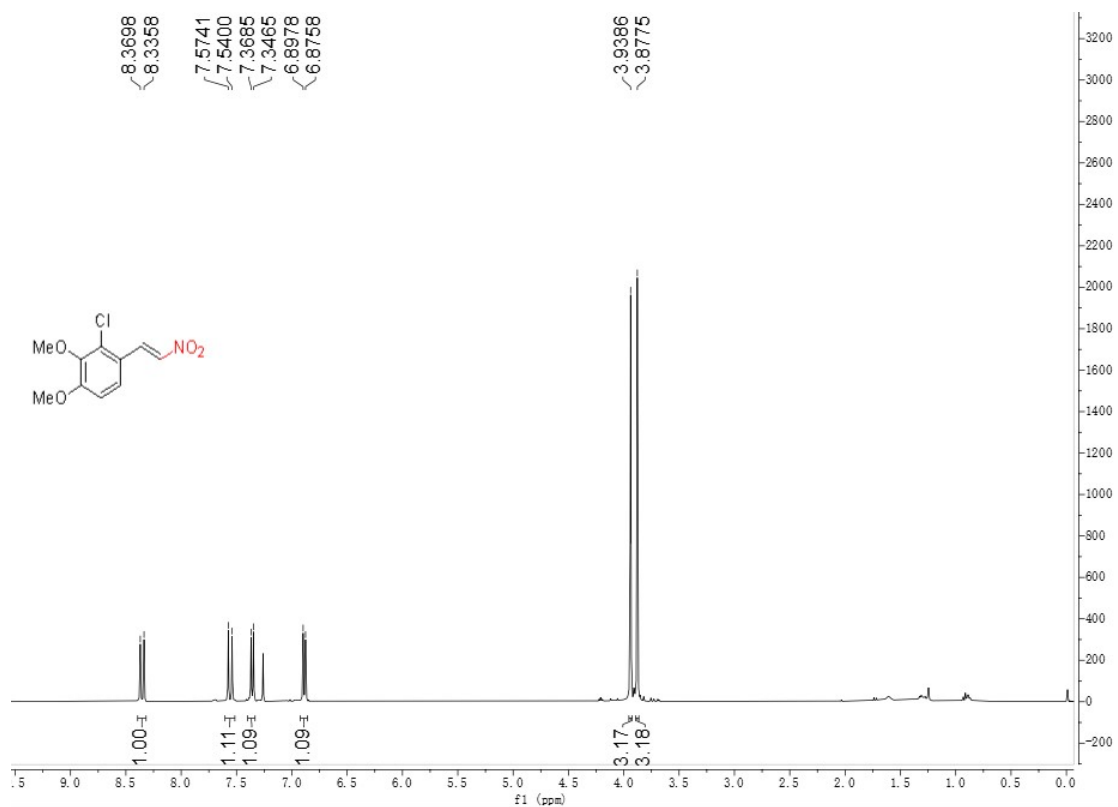

### <sup>13</sup>C NMR of 7af (100 MHz, CDCl<sub>3</sub>)

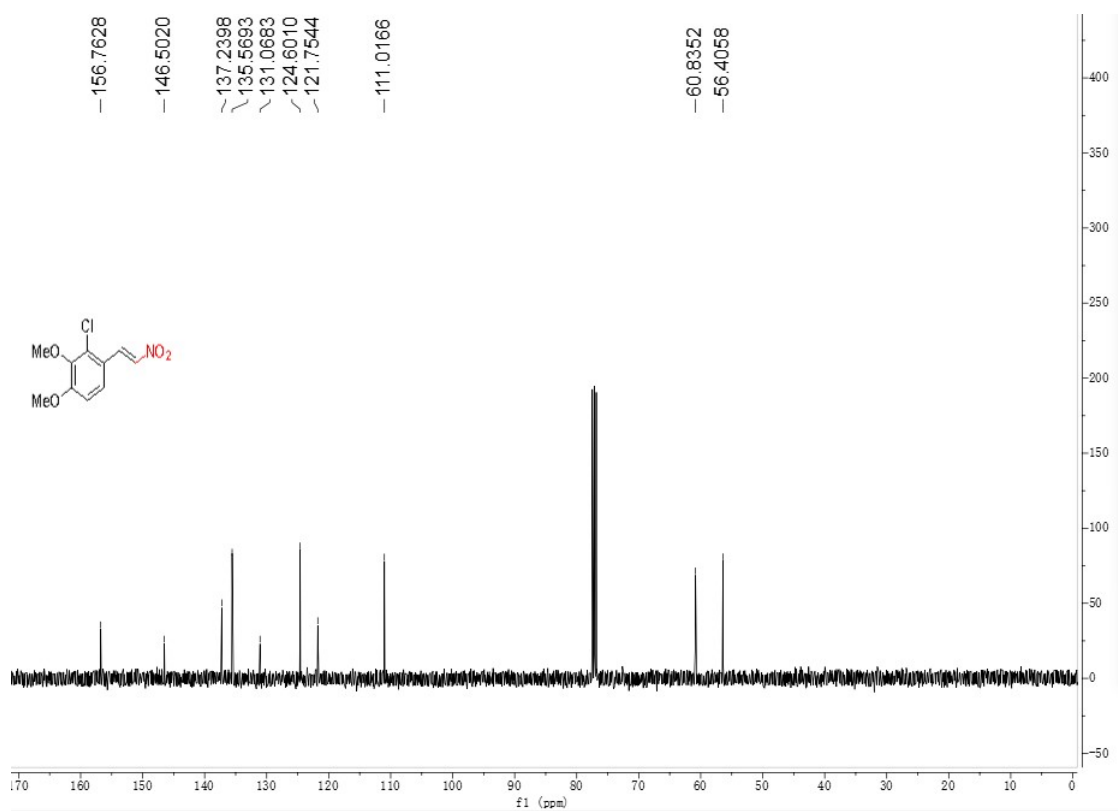

### <sup>1</sup>H NMR of 7ag (400 MHz, CDCl<sub>3</sub>)

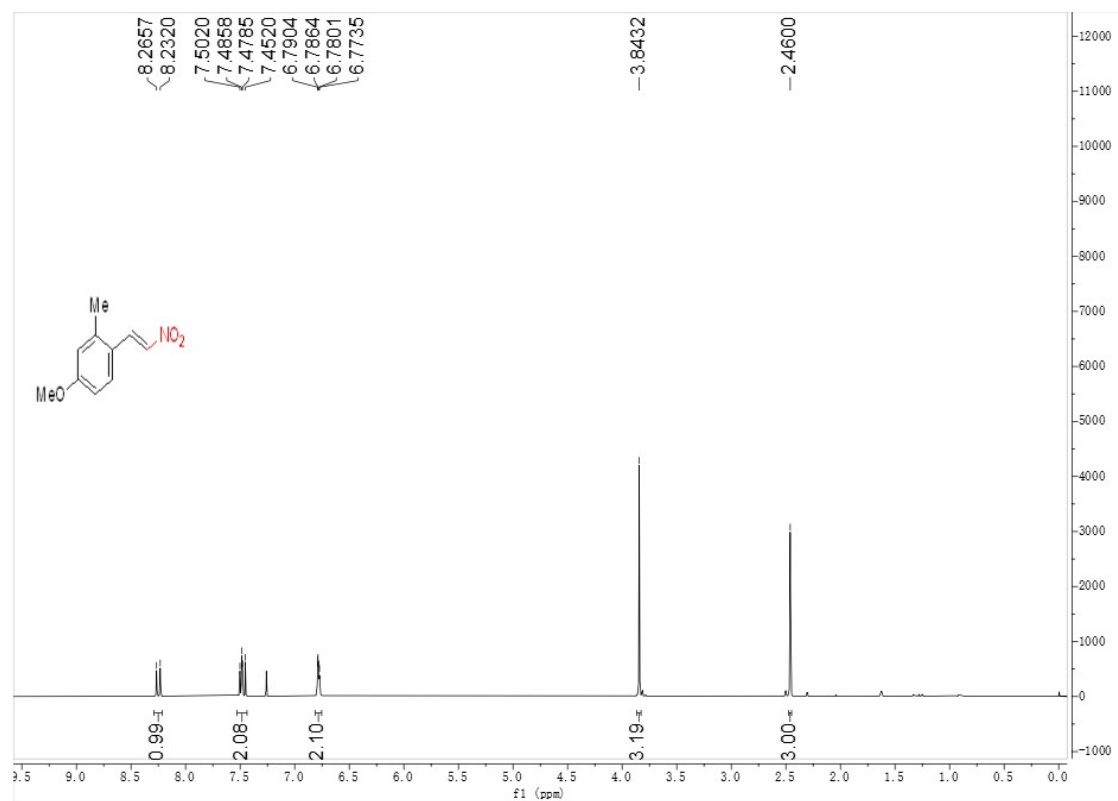

### <sup>13</sup>C NMR of 7ag (100 MHz, CDCl<sub>3</sub>)

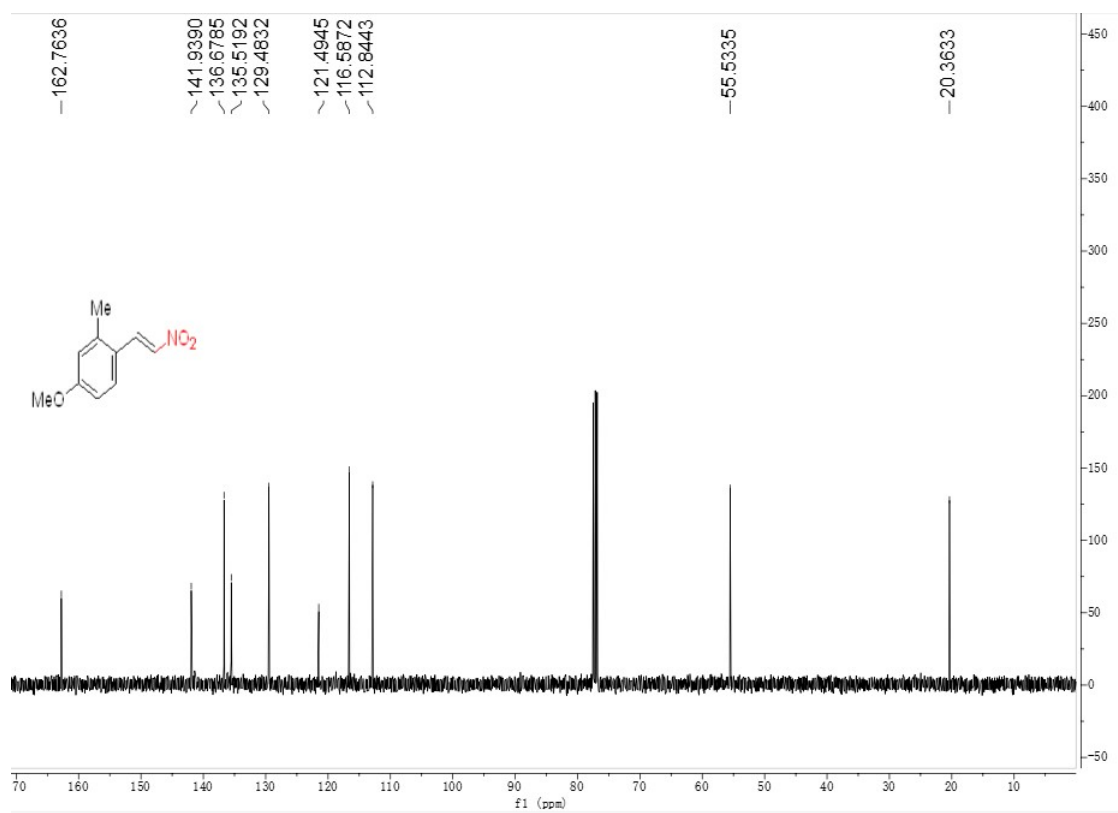



## References

- [S1] E Peyroux, F Berthiol, H Doucet, M Santelli, *Eur. J. Org. Chem.* 2004, 1075.
- [S2] W. S. Emerson and T. M. Patrick, *Jr. Organic Syntheses, Coll.*, 1963, **4**, 980.
- [S3] A. Luo, Y. Bao, X. Cheng, X. Wang, *Synthesis*, 2017, **49**, 3962.
- [S4] H. Lebel, D. Guay, V. Paquet, K. Huard, *Org. Lett.*, 2004, **6**, 3047.
- [S5] F. Cong, Y. Wei, P. Tang, *Chem. Commun.*, 2018, **54**, 4473.
- [S6] W. Su, S. Urgaonkar, P. A. McLaughlin, J. G. Verkade, *J. Am. Chem. Soc.*, 2004, **126**, 16433.
- [S7] F. J. R. Klauck, H. Yoon, M. J. James, M. Lauten, F. Glorius, *ACS Catal.*, 2019, **9**, 236.
- [S8] S. Maity, S. Manna, S. Rana, T. Naveen, A. Mallick, D. Maiti, *J. Am. Chem. Soc.*, 2013, **135**, 3355.
- [S9] S. Maity, T. Naveen, U. Sharma, D. Maiti, *Org. Lett.*, 2013, **15**, 3384.
- [S10] S. Ambala, R. Singh, M. Singh, P. S. Cham, R. Gupta, G. Munagala, K. R. Yempalla, R. A. Vishwakarmaab, P. P. Singh, *RSC Adv.*, 2019, **9**, 30428.
- [S11] I. Jovel, S. Prateptongkum, R. Jackstell, N. Vogl, C. Weckbecker, M. Beller, *Adv. Synth. Catal.* 2008, **350**, 2493.
- [S12] S. Hlekhilai, N. Samakkanad, T. Sawangphon, M. Pohmakotr, V. Reutrakul, D. Soorukram, T. Jaipetch, and C. Kuhakarn, *Eur. J. Org. Chem.*, 2014, 7433.
- [S13] E. Begari, C. Singh, U. Nookaraju, P. Kumar, *Synlett.*, 2014, **25**, 1997.
- [S14] T. Naveen, S. Maity, U. Sharma, D. Maiti, *J. Org. Chem.*, 2013, **78**, 5949.
- [S15] A. Zhao, Q. Jiang, J. Jia, B. Xu, Y. Liu, M. Zhang, Q. Liu, W. Luo, C. Guo, *Tetrahedron Letters.*, 2016, **57**, 80.
- [S16] Y .Yu, L .Cheng, Y. Li, Y .Fu, S. Zhu, Q . Zhou, *Chem. Commun.*, 2016, **52**, 4812.
